# Supplementary material for: Metastable silica high pressure polymorphs as structural proxies of deep Earth silicate melts
Source: Nat Commun. 2018 Nov 15;9:4789. doi: 10.1038/s41467-018-07265-z (PMC6237875; doi:10.1038/s41467-018-07265-z)
Supplement: Supplementary file 7 — Supplementary Data 4 [file 41467_2018_7265_MOESM7_ESM.cif]

 
data_Coesite-IV_44.18GPa

_publ_requested_journal          'Nature (London)'

_publ_contact_author_name        'Elena Bykova'
_publ_contact_author_address     
;P02.2 Extreme Conditions Beamline, Deutsches Elektronen-Synchrotron
Notkestra\&se 85,
Hamburg, D-22607
Germany
;
_publ_contact_author_email       elena.bykova@desy.de
_publ_contact_author_phone       49(0)4089985674

loop_
_publ_author_name
_publ_author_address
'Bykova, E.'
;P02.2 Extreme Conditions Beamline, Deutsches Elektronen-Synchrotron
Notkestra\&se 85,
Hamburg, D-22607
Germany
;
'\<Cernok, A.'
;School of Physical Sciences, Lunar Research Group,
The Open University 
Milton Keynes, MK7 6AA
England  
;
'Bykov, M.'
;Bayerisches Geoinstitut
University of Bayreuth, Universitaetsstrasse 30
Bayreuth, D-95440
Germany
;
'Tidholm, J.'
;Department of Physics, Chemistry and Biology (IFM), 
Link\"oping University, 
Link\"oping, SE-58183
Sweden
;
'Abrikosov, I.'
;Department of Physics, Chemistry and Biology (IFM), 
Link\"oping University, 
Link\"oping, SE-58183
Sweden
;
'Liermann, H.-P.'
;P02.2 Extreme Conditions Beamline, Deutsches Elektronen-Synchrotron
Notkestra\&se 85,
Hamburg, D-22607
Germany
;
'Hanfland M.'
;European Synchrotron Radiation Facility, 
BP 220, Grenoble F-38043, 
France
;
'Dubrovinsky, L.'
;Bayerisches Geoinstitut
University of Bayreuth, Universitaetsstrasse 30
Bayreuth, D-95440
Germany
;

_audit_creation_method           SHELXL-2014/7
_chemical_name_systematic        'silicon dioxide'
_chemical_name_common            'silicon dioxide'
_chemical_formula_moiety         'O2 Si'
_chemical_formula_sum            'O2 Si'
_chemical_melting_point          ?

_exptl_crystal_description       plate
_exptl_crystal_colour            'clear colourless'

_diffrn_ambient_temperature      296(2)
_diffrn_ambient_pressure         44180000
_chemical_formula_weight         60.09

loop_
_atom_type_symbol
_atom_type_description
_atom_type_scat_dispersion_real
_atom_type_scat_dispersion_imag
_atom_type_scat_source
O O -0.0010 0.0008 'International Tables Vol C Tables 4.2.6.8 and 6.1.1.4'
Si Si 0.0082 0.0107 'International Tables Vol C Tables 4.2.6.8 and 6.1.1.4'

_space_group_crystal_system      triclinic
_space_group_IT_number           2
_space_group_name_H-M_alt        'P -1'
_space_group_name_Hall           '-P 1'


loop_
_space_group_symop_operation_xyz
'x, y, z'
'-x, -y, -z'

_shelx_space_group_comment       
;
The symmetry employed for this shelxl refinement is uniquely defined
by the following loop, which should always be used as a source of
symmetry information in preference to the above space-group names.
They are only intended as comments.
;

_cell_length_a                   6.5586(4)
_cell_length_b                   6.9029(7)
_cell_length_c                   8.5429(8)
_cell_angle_alpha                69.599(9)
_cell_angle_beta                 83.035(6)
_cell_angle_gamma                81.933(6)
_cell_volume                     357.83(6)
_cell_formula_units_Z            16
_cell_measurement_temperature    296(2)
_cell_measurement_reflns_used    972
_cell_measurement_theta_min      1.9105
_cell_measurement_theta_max      19.5685
_exptl_crystal_density_meas      ?
_exptl_crystal_density_method    ?
_exptl_crystal_density_diffrn    4.462
_exptl_crystal_F_000             480
_exptl_transmission_factor_min   ?
_exptl_transmission_factor_max   ?
_exptl_crystal_size_max          0.020
_exptl_crystal_size_mid          0.020
_exptl_crystal_size_min          0.005
_exptl_absorpt_coefficient_mu    0.185
_shelx_estimated_absorpt_T_min   0.996
_shelx_estimated_absorpt_T_max   0.999
_exptl_absorpt_correction_T_min  0.79963
_exptl_absorpt_correction_T_max  1.00000
_exptl_absorpt_correction_type   multi-scan
_exptl_absorpt_process_details   
;
CrysAlisPro, Agilent Technologies,
Version 1.171.36.18t (release 05-06-2012 CrysAlis171 .NET)
(compiled Jun  5 2012,17:40:27)
Empirical absorption correction using spherical harmonics,
 implemented in SCALE3 ABSPACK scaling algorithm.
;
_diffrn_radiation_probe          x-ray
_diffrn_radiation_type           synchrotron
_diffrn_radiation_wavelength     0.28965
_diffrn_source                   synchrotron
_diffrn_source_type              'P02.2 Extreme Conditions Beamline, DESY'
_diffrn_measurement_device_type  
;
customized \w-circle diffractometer
;
_diffrn_measurement_method       '\w scans'

_diffrn_detector_area_resol_mean ?
_diffrn_reflns_number            2963
_diffrn_reflns_av_unetI/netI     0.0613
_diffrn_reflns_av_R_equivalents  0.0395
_diffrn_reflns_limit_h_min       -13
_diffrn_reflns_limit_h_max       14
_diffrn_reflns_limit_k_min       -10
_diffrn_reflns_limit_k_max       11
_diffrn_reflns_limit_l_min       -11
_diffrn_reflns_limit_l_max       15
_diffrn_reflns_theta_min         1.910
_diffrn_reflns_theta_max         19.569
_diffrn_reflns_theta_full        10.500
_diffrn_measured_fraction_theta_max 0.217
_diffrn_measured_fraction_theta_full 0.370
_diffrn_reflns_Laue_measured_fraction_max 0.217
_diffrn_reflns_Laue_measured_fraction_full 0.370
_diffrn_reflns_point_group_measured_fraction_max 0.217
_diffrn_reflns_point_group_measured_fraction_full 0.370
_reflns_number_total             2014
_reflns_number_gt                1562
_reflns_threshold_expression     'I > 2\s(I)'
_reflns_Friedel_coverage         0.000
_reflns_Friedel_fraction_max     .
_reflns_Friedel_fraction_full    .

_reflns_special_details          
;
 Reflections were merged by SHELXL according to the crystal
 class for the calculation of statistics and refinement.
 
 _reflns_Friedel_fraction is defined as the number of unique
 Friedel pairs measured divided by the number that would be
 possible theoretically, ignoring centric projections and
 systematic absences.
;

_computing_data_collection       
;
CrysAlisPro, Agilent Technologies,
Version 1.171.36.18t (release 05-06-2012 CrysAlis171 .NET)
(compiled Jun  5 2012,17:40:27)
;
_computing_cell_refinement       
;
CrysAlisPro, Agilent Technologies,
Version 1.171.36.18t (release 05-06-2012 CrysAlis171 .NET)
(compiled Jun  5 2012,17:40:27)
;
_computing_data_reduction        
;
CrysAlisPro, Agilent Technologies,
Version 1.171.36.18t (release 05-06-2012 CrysAlis171 .NET)
(compiled Jun  5 2012,17:40:27)
;

_computing_structure_solution    'SHELXS-2013/1 (Sheldrick, 2013)'
_computing_structure_refinement  'SHELXL-2014/7 (Sheldrick, 2014)'
_computing_molecular_graphics    ?
_computing_publication_material  ?
_refine_special_details          ?
_refine_ls_structure_factor_coef Fsqd
_refine_ls_matrix_type           full
_refine_ls_weighting_scheme      calc
_refine_ls_weighting_details     
'w=1/[\s^2^(Fo^2^)+(0.0584P)^2^] where P=(Fo^2^+2Fc^2^)/3'
_atom_sites_solution_primary     ?
_atom_sites_solution_secondary   .
_atom_sites_solution_hydrogens   .
_refine_ls_hydrogen_treatment    .
_refine_ls_extinction_method     none
_refine_ls_extinction_coef       .
_refine_ls_number_reflns         2014
_refine_ls_number_parameters     137
_refine_ls_number_restraints     0
_refine_ls_R_factor_all          0.0741
_refine_ls_R_factor_gt           0.0555
_refine_ls_wR_factor_ref         0.1399
_refine_ls_wR_factor_gt          0.1277
_refine_ls_goodness_of_fit_ref   1.167
_refine_ls_restrained_S_all      1.167
_refine_ls_shift/su_max          0.000
_refine_ls_shift/su_mean         0.000

loop_
_atom_site_label
_atom_site_type_symbol
_atom_site_fract_x
_atom_site_fract_y
_atom_site_fract_z
_atom_site_U_iso_or_equiv
_atom_site_adp_type
_atom_site_occupancy
_atom_site_site_symmetry_order
_atom_site_calc_flag
_atom_site_refinement_flags_posn
_atom_site_refinement_flags_adp
_atom_site_refinement_flags_occupancy
_atom_site_disorder_assembly
_atom_site_disorder_group
Si1 Si 0.34502(13) 0.6487(2) 0.4581(2) 0.0085(9) Uani 1 1 d . . . . .
O1 O 0.3339(4) 0.8483(6) 0.5264(6) 0.0092(4) Uiso 1 1 d . . . . .
Si2 Si 0.19452(14) 0.5156(2) 0.9955(2) 0.0091(8) Uani 1 1 d . . . . .
O2 O 0.4673(3) 0.7872(5) 0.2598(5) 0.0064(3) Uiso 1 1 d . . . . .
Si3 Si 0.09874(14) 0.3143(2) 0.6504(2) 0.0093(8) Uani 1 1 d . . . . .
O3 O 0.1507(3) 0.6814(6) 0.3255(5) 0.0064(3) Uiso 1 1 d . . . . .
Si4 Si 0.49713(14) 0.3179(2) 0.2743(2) 0.0107(9) Uani 1 1 d . . . . .
O4 O 0.1810(4) 0.5259(6) 0.6175(5) 0.0082(4) Uiso 1 1 d . . . . .
Si5 Si 0.34835(13) 0.1267(2) 0.91817(19) 0.0071(8) Uani 1 1 d . . . . .
O5 O 0.4556(4) 0.4311(6) 0.4144(5) 0.0075(3) Uiso 1 1 d . . . . .
Si6 Si 0.19587(14) 0.0639(2) 0.4449(2) 0.0084(8) Uani 1 1 d . . . . .
O6 O 0.0932(3) 0.7422(6) 0.0436(5) 0.0070(3) Uiso 1 1 d . . . . .
Si7 Si 0.04054(14) 0.8622(2) 0.83772(19) 0.0082(8) Uani 1 1 d . . . . .
O7 O 0.3731(3) 0.5161(6) 0.1294(5) 0.0077(3) Uiso 1 1 d . . . . .
Si8 Si 0.28605(13) 0.7703(2) 0.13940(19) 0.0072(8) Uani 1 1 d . . . . .
O8 O 0.0352(3) 0.3743(6) 0.1397(5) 0.0066(3) Uiso 1 1 d . . . . .
O9 O 0.1840(3) 0.0257(5) 0.1007(5) 0.0060(3) Uiso 1 1 d . . . . .
O10 O 0.3656(4) 0.1420(6) 0.2882(5) 0.0084(4) Uiso 1 1 d . . . . .
O11 O 0.1559(4) 0.2709(6) 0.4825(5) 0.0097(4) Uiso 1 1 d . . . . .
O12 O 0.1769(3) 0.0947(5) 0.7949(5) 0.0064(3) Uiso 1 1 d . . . . .
O13 O 0.2766(3) 0.3608(6) 0.8989(5) 0.0075(3) Uiso 1 1 d . . . . .
O14 O 0.2852(3) 0.7178(5) 0.8214(5) 0.0071(3) Uiso 1 1 d . . . . .
O15 O 0.0030(3) 0.9632(6) 0.6383(5) 0.0069(3) Uiso 1 1 d . . . . .
O16 O 0.4459(3) 0.8719(5) 0.9687(5) 0.0063(3) Uiso 1 1 d . . . . .

loop_
_atom_site_aniso_label
_atom_site_aniso_U_11
_atom_site_aniso_U_22
_atom_site_aniso_U_33
_atom_site_aniso_U_23
_atom_site_aniso_U_13
_atom_site_aniso_U_12
Si1 0.0060(3) 0.0074(8) 0.0095(10) 0.0004(9) -0.0001(4) -0.0005(4)
Si2 0.0058(3) 0.0074(7) 0.0107(9) 0.0005(9) 0.0015(4) -0.0005(4)
Si3 0.0055(3) 0.0072(7) 0.0113(9) 0.0017(9) -0.0001(4) -0.0007(4)
Si4 0.0057(3) 0.0094(8) 0.0126(10) 0.0011(10) 0.0015(4) -0.0007(4)
Si5 0.0052(3) 0.0058(7) 0.0087(9) -0.0005(9) -0.0003(4) -0.0004(4)
Si6 0.0068(3) 0.0076(8) 0.0095(10) -0.0012(9) -0.0007(4) -0.0009(4)
Si7 0.0058(3) 0.0074(7) 0.0088(9) 0.0004(9) -0.0005(4) -0.0007(4)
Si8 0.0054(3) 0.0062(7) 0.0083(9) -0.0003(9) 0.0003(4) -0.0012(4)

_geom_special_details            
;
 All esds (except the esd in the dihedral angle between two l.s. planes)
 are estimated using the full covariance matrix.  The cell esds are taken
 into account individually in the estimation of esds in distances, angles
 and torsion angles; correlations between esds in cell parameters are only
 used when they are defined by crystal symmetry.  An approximate (isotropic)
 treatment of cell esds is used for estimating esds involving l.s. planes.
;

loop_
_geom_bond_atom_site_label_1
_geom_bond_atom_site_label_2
_geom_bond_distance
_geom_bond_site_symmetry_2
_geom_bond_publ_flag
Si1 O1 1.664(7) . ?
Si1 O4 1.682(2) . ?
Si1 O5 1.710(4) 2_666 ?
Si1 O5 1.715(5) . ?
Si1 O3 1.746(5) . ?
Si1 O2 1.784(3) . ?
Si1 Si8 2.615(2) . ?
Si1 Si1 2.6491(18) 2_666 ?
Si1 Si4 2.713(3) 2_666 ?
O1 Si6 1.604(3) 1_565 ?
O1 Si4 2.044(4) 2_666 ?
Si2 O13 1.568(6) . ?
Si2 O8 1.643(2) 1_556 ?
Si2 O7 1.735(5) 1_556 ?
Si2 O14 1.756(2) . ?
Si2 O6 1.774(5) 1_556 ?
Si2 O8 1.915(3) 2_566 ?
Si2 Si7 2.4422(13) . ?
Si2 Si2 2.580(2) 2_567 ?
Si2 Si8 2.635(3) 1_556 ?
O2 Si8 1.704(5) . ?
O2 Si5 1.804(3) 2_666 ?
Si3 O4 1.550(5) . ?
Si3 O11 1.557(6) . ?
Si3 O3 1.621(2) 2_566 ?
Si3 O12 1.647(2) . ?
Si3 Si5 2.7993(19) . ?
Si3 Si6 2.831(3) . ?
O3 Si3 1.621(2) 2_566 ?
O3 Si8 1.680(3) . ?
Si4 O10 1.550(5) . ?
Si4 O14 1.589(3) 2_666 ?
Si4 O5 1.622(6) . ?
Si4 O7 1.679(2) . ?
Si4 O1 2.045(4) 2_666 ?
Si4 Si1 2.713(3) 2_666 ?
Si4 Si6 2.7557(15) . ?
Si5 O13 1.574(5) . ?
Si5 O16 1.707(4) 1_545 ?
Si5 O12 1.715(5) . ?
Si5 O16 1.755(5) 2_667 ?
Si5 O9 1.767(3) 1_556 ?
Si5 O2 1.804(3) 2_666 ?
Si5 Si8 2.5387(16) 2_666 ?
Si5 Si8 2.5779(13) 1_546 ?
Si5 Si5 2.6393(17) 2_657 ?
O5 Si1 1.710(4) 2_666 ?
Si6 O11 1.552(6) . ?
Si6 O1 1.604(3) 1_545 ?
Si6 O10 1.620(3) . ?
Si6 O15 1.621(5) 2_566 ?
Si6 O15 1.937(3) 1_545 ?
Si6 Si6 2.781(2) 2_556 ?
O6 Si8 1.655(5) . ?
O6 Si7 1.718(4) 1_554 ?
O6 Si2 1.774(5) 1_554 ?
Si7 O15 1.635(4) . ?
Si7 O9 1.679(3) 2_566 ?
Si7 O8 1.713(5) 2_566 ?
Si7 O6 1.718(4) 1_556 ?
Si7 O14 1.784(3) . ?
Si7 O12 1.850(5) 1_565 ?
O7 Si2 1.735(5) 1_554 ?
O7 Si8 1.796(5) . ?
Si8 O16 1.685(2) 1_554 ?
Si8 O9 1.727(4) 1_565 ?
Si8 Si5 2.5387(16) 2_666 ?
Si8 Si5 2.5779(13) 1_564 ?
Si8 Si2 2.635(3) 1_554 ?
O8 Si2 1.643(2) 1_554 ?
O8 Si7 1.713(5) 2_566 ?
O8 Si2 1.915(3) 2_566 ?
O9 Si7 1.679(3) 2_566 ?
O9 Si8 1.727(4) 1_545 ?
O9 Si5 1.768(3) 1_554 ?
O12 Si7 1.850(5) 1_545 ?
O14 Si4 1.589(3) 2_666 ?
O15 Si6 1.621(5) 2_566 ?
O15 Si6 1.937(3) 1_565 ?
O16 Si8 1.685(2) 1_556 ?
O16 Si5 1.707(4) 1_565 ?
O16 Si5 1.755(5) 2_667 ?

loop_
_geom_angle_atom_site_label_1
_geom_angle_atom_site_label_2
_geom_angle_atom_site_label_3
_geom_angle
_geom_angle_site_symmetry_1
_geom_angle_site_symmetry_3
_geom_angle_publ_flag
O1 Si1 O4 92.0(2) . . ?
O1 Si1 O5 79.2(2) . 2_666 ?
O4 Si1 O5 90.75(16) . 2_666 ?
O1 Si1 O5 156.4(2) . . ?
O4 Si1 O5 96.16(19) . . ?
O5 Si1 O5 78.7(3) 2_666 . ?
O1 Si1 O3 111.94(19) . . ?
O4 Si1 O3 87.39(17) . . ?
O5 Si1 O3 168.8(3) 2_666 . ?
O5 Si1 O3 90.5(2) . . ?
O1 Si1 O2 92.5(2) . . ?
O4 Si1 O2 166.1(2) . . ?
O5 Si1 O2 102.94(14) 2_666 . ?
O5 Si1 O2 84.69(18) . . ?
O3 Si1 O2 78.77(16) . . ?
O1 Si1 Si8 111.99(12) . . ?
O4 Si1 Si8 126.10(19) . . ?
O5 Si1 Si8 139.32(12) 2_666 . ?
O5 Si1 Si8 80.56(15) . . ?
O3 Si1 Si8 39.33(9) . . ?
O2 Si1 Si8 40.31(16) . . ?
O1 Si1 Si1 118.17(19) . 2_666 ?
O4 Si1 Si1 94.47(9) . 2_666 ?
O5 Si1 Si1 39.39(18) 2_666 2_666 ?
O5 Si1 Si1 39.28(15) . 2_666 ?
O3 Si1 Si1 129.7(2) . 2_666 ?
O2 Si1 Si1 94.86(9) . 2_666 ?
Si8 Si1 Si1 112.55(12) . 2_666 ?
O1 Si1 Si4 48.78(14) . 2_666 ?
O4 Si1 Si4 77.9(2) . 2_666 ?
O5 Si1 Si4 34.43(18) 2_666 2_666 ?
O5 Si1 Si4 111.64(15) . 2_666 ?
O3 Si1 Si4 154.39(16) . 2_666 ?
O2 Si1 Si4 114.67(19) . 2_666 ?
Si8 Si1 Si4 152.99(7) . 2_666 ?
Si1 Si1 Si4 72.91(9) 2_666 2_666 ?
Si6 O1 Si1 122.4(4) 1_565 . ?
Si6 O1 Si4 143.6(4) 1_565 2_666 ?
Si1 O1 Si4 93.48(15) . 2_666 ?
O13 Si2 O8 100.0(2) . 1_556 ?
O13 Si2 O7 110.7(2) . 1_556 ?
O8 Si2 O7 96.79(19) 1_556 1_556 ?
O13 Si2 O14 88.6(2) . . ?
O8 Si2 O14 160.48(11) 1_556 . ?
O7 Si2 O14 96.49(19) 1_556 . ?
O13 Si2 O6 163.04(15) . 1_556 ?
O8 Si2 O6 91.6(2) 1_556 1_556 ?
O7 Si2 O6 79.8(2) 1_556 1_556 ?
O14 Si2 O6 76.73(19) . 1_556 ?
O13 Si2 O8 91.9(2) . 2_566 ?
O8 Si2 O8 87.35(13) 1_556 2_566 ?
O7 Si2 O8 155.8(2) 1_556 2_566 ?
O14 Si2 O8 74.78(13) . 2_566 ?
O6 Si2 O8 76.2(2) 1_556 2_566 ?
O13 Si2 Si7 118.55(14) . . ?
O8 Si2 Si7 114.22(9) 1_556 . ?
O7 Si2 Si7 113.70(16) 1_556 . ?
O14 Si2 Si7 46.85(9) . . ?
O6 Si2 Si7 44.68(13) 1_556 . ?
O8 Si2 Si7 44.27(15) 2_566 . ?
O13 Si2 Si2 97.77(19) . 2_567 ?
O8 Si2 Si2 47.86(11) 1_556 2_567 ?
O7 Si2 Si2 138.78(15) 1_556 2_567 ?
O14 Si2 Si2 113.90(11) . 2_567 ?
O6 Si2 Si2 80.85(13) 1_556 2_567 ?
O8 Si2 Si2 39.49(7) 2_566 2_567 ?
Si7 Si2 Si2 74.32(5) . 2_567 ?
O13 Si2 Si8 147.14(14) . 1_556 ?
O8 Si2 Si8 102.0(2) 1_556 1_556 ?
O7 Si2 Si8 42.61(15) 1_556 1_556 ?
O14 Si2 Si8 78.6(2) . 1_556 ?
O6 Si2 Si8 38.14(14) 1_556 1_556 ?
O8 Si2 Si8 113.17(18) 2_566 1_556 ?
Si7 Si2 Si8 73.33(8) . 1_556 ?
Si2 Si2 Si8 115.09(11) 2_567 1_556 ?
Si8 O2 Si1 97.08(16) . . ?
Si8 O2 Si5 92.7(2) . 2_666 ?
Si1 O2 Si5 163.73(13) . 2_666 ?
O4 Si3 O11 104.0(2) . . ?
O4 Si3 O3 114.91(19) . 2_566 ?
O11 Si3 O3 103.5(3) . 2_566 ?
O4 Si3 O12 124.7(3) . . ?
O11 Si3 O12 104.2(2) . . ?
O3 Si3 O12 103.16(12) 2_566 . ?
O4 Si3 Si5 90.38(16) . . ?
O11 Si3 Si5 120.13(10) . . ?
O3 Si3 Si5 122.29(13) 2_566 . ?
O12 Si3 Si5 34.41(19) . . ?
O4 Si3 Si6 125.53(17) . . ?
O11 Si3 Si6 24.39(13) . . ?
O3 Si3 Si6 100.5(2) 2_566 . ?
O12 Si3 Si6 81.5(2) . . ?
Si5 Si3 Si6 104.67(6) . . ?
Si3 O3 Si8 124.2(2) 2_566 . ?
Si3 O3 Si1 134.9(3) 2_566 . ?
Si8 O3 Si1 99.47(14) . . ?
O10 Si4 O14 109.0(3) . 2_666 ?
O10 Si4 O5 119.1(2) . . ?
O14 Si4 O5 125.2(3) 2_666 . ?
O10 Si4 O7 99.6(2) . . ?
O14 Si4 O7 103.01(13) 2_666 . ?
O5 Si4 O7 93.7(2) . . ?
O10 Si4 O1 96.17(18) . 2_666 ?
O14 Si4 O1 79.90(15) 2_666 2_666 ?
O5 Si4 O1 70.8(2) . 2_666 ?
O7 Si4 O1 161.9(3) . 2_666 ?
O10 Si4 Si1 122.98(16) . 2_666 ?
O14 Si4 Si1 95.4(2) 2_666 2_666 ?
O5 Si4 Si1 36.60(10) . 2_666 ?
O7 Si4 Si1 124.4(2) . 2_666 ?
O1 Si4 Si1 37.74(18) 2_666 2_666 ?
O10 Si4 Si6 30.35(18) . . ?
O14 Si4 Si6 133.96(19) 2_666 . ?
O5 Si4 Si6 88.82(12) . . ?
O7 Si4 Si6 104.66(11) . . ?
O1 Si4 Si6 84.78(9) 2_666 . ?
Si1 Si4 Si6 98.33(7) 2_666 . ?
Si3 O4 Si1 127.4(4) . . ?
O13 Si5 O16 170.1(3) . 1_545 ?
O13 Si5 O12 98.4(2) . . ?
O16 Si5 O12 91.1(2) 1_545 . ?
O13 Si5 O16 90.2(2) . 2_667 ?
O16 Si5 O16 80.7(3) 1_545 2_667 ?
O12 Si5 O16 169.8(2) . 2_667 ?
O13 Si5 O9 94.62(19) . 1_556 ?
O16 Si5 O9 82.04(15) 1_545 1_556 ?
O12 Si5 O9 91.35(18) . 1_556 ?
O16 Si5 O9 93.50(18) 2_667 1_556 ?
O13 Si5 O2 89.01(17) . 2_666 ?
O16 Si5 O2 93.85(16) 1_545 2_666 ?
O12 Si5 O2 91.27(19) . 2_666 ?
O16 Si5 O2 83.29(18) 2_667 2_666 ?
O9 Si5 O2 175.18(10) 1_556 2_666 ?
O13 Si5 Si8 86.26(12) . 2_666 ?
O16 Si5 Si8 89.49(11) 1_545 2_666 ?
O12 Si5 Si8 133.26(12) . 2_666 ?
O16 Si5 Si8 41.38(9) 2_667 2_666 ?
O9 Si5 Si8 134.87(18) 1_556 2_666 ?
O2 Si5 Si8 42.12(16) 2_666 2_666 ?
O13 Si5 Si8 135.98(14) . 1_546 ?
O16 Si5 Si8 40.22(9) 1_545 1_546 ?
O12 Si5 Si8 90.45(11) . 1_546 ?
O16 Si5 Si8 87.17(9) 2_667 1_546 ?
O9 Si5 Si8 41.86(13) 1_556 1_546 ?
O2 Si5 Si8 134.06(13) 2_666 1_546 ?
Si8 Si5 Si8 117.90(4) 2_666 1_546 ?
O13 Si5 Si5 129.8(2) . 2_657 ?
O16 Si5 Si5 41.02(17) 1_545 2_657 ?
O12 Si5 Si5 131.83(19) . 2_657 ?
O16 Si5 Si5 39.64(14) 2_667 2_657 ?
O9 Si5 Si5 87.20(8) 1_556 2_657 ?
O2 Si5 Si5 88.04(8) 2_666 2_657 ?
Si8 Si5 Si5 59.68(5) 2_666 2_657 ?
Si8 Si5 Si5 58.22(4) 1_546 2_657 ?
O13 Si5 Si3 68.95(19) . . ?
O16 Si5 Si3 121.0(2) 1_545 . ?
O12 Si5 Si3 32.88(10) . . ?
O16 Si5 Si3 151.09(10) 2_667 . ?
O9 Si5 Si3 107.53(11) 1_556 . ?
O2 Si5 Si3 76.74(11) 2_666 . ?
Si8 Si5 Si3 114.65(5) 2_666 . ?
Si8 Si5 Si3 121.73(8) 1_546 . ?
Si5 Si5 Si3 156.20(14) 2_657 . ?
Si4 O5 Si1 108.97(18) . 2_666 ?
Si4 O5 Si1 145.49(18) . . ?
Si1 O5 Si1 101.3(3) 2_666 . ?
O11 Si6 O1 133.4(3) . 1_545 ?
O11 Si6 O10 96.1(2) . . ?
O1 Si6 O10 92.61(14) 1_545 . ?
O11 Si6 O15 108.8(2) . 2_566 ?
O1 Si6 O15 113.0(3) 1_545 2_566 ?
O10 Si6 O15 104.5(2) . 2_566 ?
O11 Si6 O15 84.55(19) . 1_545 ?
O1 Si6 O15 85.12(13) 1_545 1_545 ?
O10 Si6 O15 177.41(13) . 1_545 ?
O15 Si6 O15 77.5(2) 2_566 1_545 ?
O11 Si6 Si4 70.27(11) . . ?
O1 Si6 Si4 100.90(11) 1_545 . ?
O10 Si6 Si4 28.9(2) . . ?
O15 Si6 Si4 124.36(11) 2_566 . ?
O15 Si6 Si4 150.5(2) 1_545 . ?
O11 Si6 Si6 97.00(13) . 2_556 ?
O1 Si6 Si6 99.68(12) 1_545 2_556 ?
O10 Si6 Si6 147.4(2) . 2_556 ?
O15 Si6 Si6 42.85(11) 2_566 2_556 ?
O15 Si6 Si6 34.68(15) 1_545 2_556 ?
Si4 Si6 Si6 159.27(5) . 2_556 ?
O11 Si6 Si3 24.49(13) . . ?
O1 Si6 Si3 115.1(3) 1_545 . ?
O10 Si6 Si3 116.4(2) . . ?
O15 Si6 Si3 113.18(18) 2_566 . ?
O15 Si6 Si3 63.64(18) 1_545 . ?
Si4 Si6 Si3 88.06(8) . . ?
Si6 Si6 Si3 85.42(9) 2_556 . ?
Si8 O6 Si7 128.37(16) . 1_554 ?
Si8 O6 Si2 100.40(13) . 1_554 ?
Si7 O6 Si2 88.7(3) 1_554 1_554 ?
O15 Si7 O9 94.36(16) . 2_566 ?
O15 Si7 O8 94.6(3) . 2_566 ?
O9 Si7 O8 99.21(18) 2_566 2_566 ?
O15 Si7 O6 175.7(2) . 1_556 ?
O9 Si7 O6 89.69(18) 2_566 1_556 ?
O8 Si7 O6 83.3(2) 2_566 1_556 ?
O15 Si7 O14 98.48(18) . . ?
O9 Si7 O14 167.2(2) 2_566 . ?
O8 Si7 O14 79.36(18) 2_566 . ?
O6 Si7 O14 77.47(16) 1_556 . ?
O15 Si7 O12 83.6(2) . 1_565 ?
O9 Si7 O12 93.4(2) 2_566 1_565 ?
O8 Si7 O12 167.36(16) 2_566 1_565 ?
O6 Si7 O12 97.7(2) 1_556 1_565 ?
O14 Si7 O12 88.52(17) . 1_565 ?
O15 Si7 Si2 129.3(2) . . ?
O9 Si7 Si2 123.71(8) 2_566 . ?
O8 Si7 Si2 51.31(11) 2_566 . ?
O6 Si7 Si2 46.58(17) 1_556 . ?
O14 Si7 Si2 45.92(7) . . ?
O12 Si7 Si2 121.22(10) 1_565 . ?
Si4 O7 Si2 130.3(3) . 1_554 ?
Si4 O7 Si8 126.9(4) . . ?
Si2 O7 Si8 96.56(12) 1_554 . ?
O6 Si8 O3 90.29(19) . . ?
O6 Si8 O16 98.3(2) . 1_554 ?
O3 Si8 O16 171.1(3) . 1_554 ?
O6 Si8 O2 173.16(14) . . ?
O3 Si8 O2 82.88(19) . . ?
O16 Si8 O2 88.51(19) 1_554 . ?
O6 Si8 O9 87.6(2) . 1_565 ?
O3 Si8 O9 94.39(19) . 1_565 ?
O16 Si8 O9 83.88(16) 1_554 1_565 ?
O2 Si8 O9 93.1(2) . 1_565 ?
O6 Si8 O7 81.3(2) . . ?
O3 Si8 O7 94.40(18) . . ?
O16 Si8 O7 89.04(19) 1_554 . ?
O2 Si8 O7 98.86(19) . . ?
O9 Si8 O7 165.9(2) 1_565 . ?
O6 Si8 Si5 141.60(14) . 2_666 ?
O3 Si8 Si5 128.02(19) . 2_666 ?
O16 Si8 Si5 43.53(16) 1_554 2_666 ?
O2 Si8 Si5 45.21(10) . 2_666 ?
O9 Si8 Si5 91.35(12) 1_565 2_666 ?
O7 Si8 Si5 91.87(10) . 2_666 ?
O6 Si8 Si5 92.96(10) . 1_564 ?
O3 Si8 Si5 137.04(17) . 1_564 ?
O16 Si8 Si5 40.84(13) 1_554 1_564 ?
O2 Si8 Si5 92.23(11) . 1_564 ?
O9 Si8 Si5 43.07(9) 1_565 1_564 ?
O7 Si8 Si5 128.44(12) . 1_564 ?
Si5 Si8 Si5 62.10(4) 2_666 1_564 ?
O6 Si8 Si1 130.61(10) . . ?
O3 Si8 Si1 41.20(14) . . ?
O16 Si8 Si1 130.62(17) 1_554 . ?
O2 Si8 Si1 42.61(8) . . ?
O9 Si8 Si1 101.91(19) 1_565 . ?
O7 Si8 Si1 91.93(14) . . ?
Si5 Si8 Si1 87.11(7) 2_666 . ?
Si5 Si8 Si1 126.75(11) 1_564 . ?
O6 Si8 Si2 41.47(16) . 1_554 ?
O3 Si8 Si2 100.0(2) . 1_554 ?
O16 Si8 Si2 88.0(2) 1_554 1_554 ?
O2 Si8 Si2 139.58(15) . 1_554 ?
O9 Si8 Si2 126.44(18) 1_565 1_554 ?
O7 Si8 Si2 40.84(15) . 1_554 ?
Si5 Si8 Si2 117.22(8) 2_666 1_554 ?
Si5 Si8 Si2 110.46(8) 1_564 1_554 ?
Si1 Si8 Si2 122.41(6) . 1_554 ?
Si2 O8 Si7 129.6(3) 1_554 2_566 ?
Si2 O8 Si2 92.65(13) 1_554 2_566 ?
Si7 O8 Si2 84.4(2) 2_566 2_566 ?
Si7 O9 Si8 133.30(15) 2_566 1_545 ?
Si7 O9 Si5 128.34(13) 2_566 1_554 ?
Si8 O9 Si5 95.07(19) 1_545 1_554 ?
Si4 O10 Si6 120.8(4) . . ?
Si6 O11 Si3 131.12(16) . . ?
Si3 O12 Si5 112.7(3) . . ?
Si3 O12 Si7 119.6(2) . 1_545 ?
Si5 O12 Si7 126.35(13) . 1_545 ?
Si2 O13 Si5 144.9(2) . . ?
Si4 O14 Si2 119.95(16) 2_666 . ?
Si4 O14 Si7 152.22(14) 2_666 . ?
Si2 O14 Si7 87.24(11) . . ?
Si6 O15 Si7 124.72(15) 2_566 . ?
Si6 O15 Si6 102.5(2) 2_566 1_565 ?
Si7 O15 Si6 130.59(19) . 1_565 ?
Si8 O16 Si5 98.9(2) 1_556 1_565 ?
Si8 O16 Si5 95.1(2) 1_556 2_667 ?
Si5 O16 Si5 99.3(3) 1_565 2_667 ?

_refine_diff_density_max         0.800
_refine_diff_density_min         -0.672
_refine_diff_density_rms         0.160

_shelx_res_file
;

    C:\XCALIB~1\HA3C17~1\Coesite\P1_s1\struct\tmp\sol2\test.res created by SHELXL-2014/7

TITL Coes_C1_P1_s1 in P-1
CELL 0.28965 6.5586 6.9029 8.5429 69.599 83.035 81.933
ZERR 16.0000 0.0004 0.0007 0.0008 0.009 0.006 0.006
LATT 1
SFAC O SI
DISP          Si    0.00816    0.01070        28.03
DISP          O    -0.00101    0.00082         6.64
UNIT 32 16
MERG 2
FMAP 2
GRID
PLAN 20
TEMP 23
SIZE 0.02 0.02 0.005
EQIV $1 1-X,1-Y,1-Z
EQIV $2 -X,1-Y,2-Z
EQIV $3 -X,1-Y,1-Z
EQIV $4 X,Y-1,Z
OMIT     -6 -3 9
OMIT     -5 2 3
OMIT     6 1 1
OMIT     -11 1 2
OMIT     -2 -8 2
OMIT     5 -6 6
OMIT     -7 -6 5
OMIT     5 -4 7
OMIT     0 -2 10
OMIT     7 -6 6
OMIT     4 -7 3
OMIT     5 -1 4
OMIT    -1 -5 6
OMIT    -8 -9 5
OMIT    -2 -3 4
OMIT    7 -1 7
OMIT  12  -3   4
OMIT  6   1   0
OMIT  9  -8   1

L.S. 10
ACTA 21
WGHT    0.058400
FVAR       4.15047
SI1   2    0.345021    0.648711    0.458061    11.00000    0.00598    0.00736 =
         0.00950    0.00043   -0.00013   -0.00054
O1    1    0.333942    0.848325    0.526429    11.00000    0.00922
SI2   2    0.194522    0.515632    0.995467    11.00000    0.00578    0.00742 =
         0.01072    0.00054    0.00149   -0.00052
O2    1    0.467332    0.787174    0.259849    11.00000    0.00640
SI3   2    0.098742    0.314277    0.650444    11.00000    0.00554    0.00718 =
         0.01130    0.00172   -0.00014   -0.00073
O3    1    0.150724    0.681383    0.325493    11.00000    0.00639
SI4   2    0.497132    0.317870    0.274332    11.00000    0.00569    0.00942 =
         0.01261    0.00106    0.00151   -0.00075
O4    1    0.180967    0.525912    0.617523    11.00000    0.00817
SI5   2    0.348346    0.126738    0.918168    11.00000    0.00521    0.00583 =
         0.00869   -0.00046   -0.00029   -0.00045
O5    1    0.455586    0.431131    0.414407    11.00000    0.00748
SI6   2    0.195873    0.063880    0.444890    11.00000    0.00678    0.00760 =
         0.00954   -0.00120   -0.00069   -0.00091
O6    1    0.093177    0.742222    0.043630    11.00000    0.00702
SI7   2    0.040537    0.862241    0.837723    11.00000    0.00582    0.00740 =
         0.00884    0.00037   -0.00053   -0.00065
O7    1    0.373128    0.516091    0.129352    11.00000    0.00767
SI8   2    0.286054    0.770310    0.139404    11.00000    0.00538    0.00617 =
         0.00835   -0.00027    0.00028   -0.00119
O8    1    0.035150    0.374280    0.139689    11.00000    0.00660
O9    1    0.183988    0.025737    0.100652    11.00000    0.00605
O10   1    0.365577    0.141963    0.288228    11.00000    0.00844
O11   1    0.155874    0.270858    0.482535    11.00000    0.00970
O12   1    0.176904    0.094749    0.794897    11.00000    0.00640
O13   1    0.276629    0.360774    0.898879    11.00000    0.00754
O14   1    0.285198    0.717834    0.821381    11.00000    0.00707
O15   1    0.002978    0.963206    0.638310    11.00000    0.00692
O16   1    0.445870    0.871875    0.968732    11.00000    0.00627
HKLF 4

REM  Coes_C1_P1_s1 in P-1
REM R1 =  0.0555 for    1562 Fo > 4sig(Fo)  and  0.0741 for all    2014 data
REM    137 parameters refined using      0 restraints

END

WGHT      0.0584      0.0000

REM Highest difference peak  0.800,  deepest hole -0.672,  1-sigma level  0.160
Q1    1   0.1004  0.3788  0.5576  11.00000  0.05    0.80
Q2    1   0.3273  0.2169  0.8488  11.00000  0.05    0.79
Q3    1   0.2749  0.7214  0.3913  11.00000  0.05    0.71
Q4    1   0.0790  0.8613  0.0104  11.00000  0.05    0.70
Q5    1   0.2211  0.8265  0.0682  11.00000  0.05    0.66
Q6    1   0.2047  0.3275  0.5768  11.00000  0.05    0.65
Q7    1   0.2581 -0.0017  0.4761  11.00000  0.05    0.64
Q8    1   0.4960  0.1846  0.8904  11.00000  0.05    0.63
Q9    1   0.4477  0.3826  0.3224  11.00000  0.05    0.62
Q10   1   0.3620  0.8192  0.4847  11.00000  0.05    0.61
Q11   1   0.1430  0.7400  0.3098  11.00000  0.05    0.59
Q12   1   0.4249  0.8362  0.2264  11.00000  0.05    0.58
Q13   1   0.2376  0.1546  0.8800  11.00000  0.05    0.58
Q14   1   0.0656  0.6066  0.9514  11.00000  0.05    0.58
Q15   1   0.0614  0.7875  0.8024  11.00000  0.05    0.56
Q16   1   0.2565  0.4182  0.9582  11.00000  0.05    0.56
Q17   1   0.2238  0.7748  0.4302  11.00000  0.05    0.55
Q18   1   0.4000  0.1615  0.3312  11.00000  0.05    0.55
Q19   1  -0.0186  0.2421  0.2623  11.00000  0.05    0.54
Q20   1   0.3853  0.3836  0.0540  11.00000  0.05    0.54
;
_shelx_res_checksum              85796

_shelx_hkl_file                  
;
   0  -1   7 1938.79 215.536   1
   0  -1   6 9770.94 445.284   1
   0  -1   5 251.957 69.5149   1
   0  -1   4 19172.2 533.335   1
   0   1  -3 68774.9 887.600   1
   0  -1   3 69569.7 949.429   1
   0  -1   2 6799.58 254.544   1
   0   1  -2 7140.68 262.540   1
   0  -1   1 84.4000 25.6632   1
   0   1  -1 73.3900 23.8958   1
   0  -2  10 94182.9 1934.11   1
   0  -2   9 28620.1 1011.11   1
   0  -2   8 1652.78 233.701   1
   0  -2   7 34273.2 984.073   1
   0  -2   6 14673.5 610.272   1
   0   2  -5 14494.0 548.697   1
   0  -2   5 14485.2 574.338   1
   0  -2   4 9453.61 441.783   1
   0   2  -4 8956.95 407.744   1
   0   2  -3 41396.9 814.182   1
   0  -2   3 39878.4 862.932   1
   0   2  -2 464.483 86.9716   1
   0  -2   2 528.906 90.0698   1
   0   2  -1 3945.12 241.529   1
   0  -2   1 4421.95 256.630   1
   0  -2   0 17817.3 621.507   1
   0   2   0 16527.4 557.065   1
   0  -3  12 1138.43 257.618   1
   0  -3  11-11.3712 75.9340   1
   0  -3  10-60.4642 85.0291   1
   0  -3   9 19963.1 913.589   1
   0  -3   8 1821.79 271.077   1
   0  -3   7 1456.30 237.790   1
   0   3  -7 1674.62 228.377   1
   0   3  -6 4139.34 336.199   1
   0  -3   6 3635.15 358.984   1
   0  -3   5 24537.7 848.033   1
   0   3  -5 25499.3 814.539   1
   0  -3   4 4547.56 340.878   1
   0   3  -4 4310.53 318.214   1
   0  -3   3 23117.5 751.029   1
   0   3  -3 23142.8 737.925   1
   0   3  -2 20419.2 643.997   1
   0  -3   2 21644.8 718.720   1
   0  -3   1 9046.46 499.438   1
   0   3  -1 9837.91 457.648   1
   0   3   0 4.87072 32.5346   1
   0  -3   0-56.3905 60.9041   1
   0  -4  14 1059.43 304.454   1
   0  -4  13 1837.34 376.537   1
   0  -4  12 505.326 207.022   1
   0  -4  11 1230.92 288.947   1
   0  -4  10-4.62069 83.7635   1
   0  -4   9 785.788 213.687   1
   0   4  -8 28217.1 1030.07   1
   0  -4   8 28247.3 1122.06   1
   0   4  -7 271.944 109.185   1
   0  -4   7 451.635 143.858   1
   0  -4   6 1465.31 239.890   1
   0   4  -6 1388.69 221.495   1
   0  -4   5 21773.0 872.076   1
   0   4  -5 21480.1 812.564   1
   0   4  -4 408.692 119.207   1
   0  -4   4 327.545 116.559   1
   0  -4   3 1545.50 231.631   1
   0   4  -3 1504.76 208.500   1
   0   4  -2 12040.5 571.946   1
   0  -4   2 12708.1 673.977   1
   0   4  -1 3256.36 302.633   1
   0  -4   1 2566.72 330.869   1
   0   4   0 3247.49 345.884   1
   0  -4   0 3469.42 428.700   1
   0  -5  13 578.748 223.618   1
   0  -5  12 914.919 258.949   1
   0  -5  11 2924.66 428.932   1
   0  -5  10 815.496 232.768   1
   0   5  -9 3441.37 403.126   1
   0  -5   9 3313.82 434.244   1
   0   5  -8 16038.5 823.140   1
   0  -5   8 16761.8 919.394   1
   0  -5   7-205.229 122.939   1
   0   5  -7 91.4433 86.2406   1
   0  -5   6 2359.08 344.552   1
   0   5  -6 2403.68 308.363   1
   0  -5   5 2124.32 334.111   1
   0   5  -5 2079.85 283.217   1
   0  -5   4 5669.43 497.582   1
   0   5  -4 4687.43 433.049   1
   0   5  -3 3769.83 354.983   1
   0  -5   3 3871.86 424.113   1
   0  -5   2 29241.7 1199.03   1
   0   5  -2 28192.3 1001.64   1
   0  -5   1 1348.76 263.645   1
   0   5  -1 1205.14 210.855   1
   0   5   0 53474.3 1531.51   1
   0  -6  12 1558.19 360.244   1
   0  -6  11 930.777 279.343   1
   0  -6  10 1404.60 327.295   1
   0   6 -10 1531.37 301.053   1
   0  -6   9 386.958 190.016   1
   0   6  -9 599.309 191.587   1
   0   6  -8 2818.98 383.936   1
   0  -6   8 2358.40 404.265   1
   0   6  -7 303.837 140.529   1
   0  -6   7 237.760 159.711   1
   0  -6   6 8185.52 699.725   1
   0   6  -6 8091.84 608.383   1
   0  -6   5 3834.21 463.262   1
   0   6  -5 3709.42 415.806   1
   0   6  -4 9796.18 664.507   1
   0  -6   4 9711.38 753.356   1
   0   6  -3 25178.7 1013.54   1
   0  -6   3 24973.6 1245.76   1
   0  -6   2 1894.66 366.701   1
   0   6  -2 1857.13 286.909   1
   0  -6   1 2637.63 436.945   1
   0   6  -1 2648.53 340.436   1
   0   7 -10 191.726 142.861   1
   0  -7  10-155.732 178.256   1
   0  -7   9 8816.16 872.483   1
   0   7  -9 10025.6 769.987   1
   0  -7   8 309.440 193.750   1
   0   7  -8 3004.22 433.266   1
   0  -7   7 12496.9 942.810   1
   0   7  -7 12601.4 824.464   1
   0  -7   6 525.071 219.705   1
   0   7  -6-21.2799 83.6957   1
   0  -7   5 2329.20 434.211   1
   0   7  -5 2060.28 345.304   1
   0   7  -4 44.4395 85.0700   1
   0  -7   4 333.231 194.277   1
   0   7  -3 1639.77 285.157   1
   0  -7   3 2170.88 438.561   1
   0  -7   2-143.760 147.003   1
   0   7  -2 317.750 146.740   1
   0  -7   1 5010.16 715.095   1
   0   7  -1 5214.79 517.325   1
   0   8  -9 102.978 131.460   1
   0  -8   9 161.610 180.538   1
   0   8  -8 125.249 135.063   1
   0  -8   8 215.689 196.343   1
   0   8  -7 1892.51 353.677   1
   0  -8   7 1989.85 447.719   1
   0  -8   6 1033.64 341.010   1
   0   8  -6 1380.44 303.202   1
   0   8  -5 754.016 239.231   1
   0  -8   5 1012.09 336.154   1
   0   8  -4 5220.48 542.726   1
   0  -8   4 5153.45 731.783   1
   0   8  -3 802.662 223.004   1
   0  -8   3 797.046 297.727   1
   0   8  -2 13956.1 906.170   1
   0  -8   2 16688.9 1328.27   1
   0   8  -1 81387.1 2194.73   1
   0   9  -7 245.662 165.861   1
   0  -9   7 158.440 219.488   1
   0  -9   6 674.359 327.130   1
   0   9  -6 135.329 140.555   1
   0  -9   5 10121.5 1115.41   1
   0   9  -5 9108.72 826.552   1
   0  -9   4 94.8283 189.361   1
   0   9  -4 389.801 179.694   1
   0  -9   3 369.461 269.985   1
   0   9  -3 471.980 193.107   1
   0   9  -2 6065.74 648.732   1
   0  -9   2 6110.47 944.328   1
   0 -10   5 2387.81 580.798   1
   0  10  -5 1453.31 364.996   1
   0 -10   4 2.97622 210.084   1
   0  10  -4 453.231 204.790   1
   0 -10   3 378.574 351.680   1
   0  10  -3 101.211 130.289   1
   0  10  -2 1828.65 391.489   1
  -1  10  -2 4107.38 571.969   1
   1 -10   2 3148.19 767.585   1
   1 -10   3 5064.93 887.973   1
  -1  10  -3 4383.89 586.261   1
   1 -10   4 842.161 378.752   1
  -1  10  -4 890.054 284.633   1
   1 -10   5 3256.54 691.601   1
  -1   9  -1 11183.2 929.178   1
  -1   9  -2 4452.03 560.510   1
   1  -9   2 4652.72 799.238   1
   1  -9   3 3109.25 598.427   1
  -1   9  -3 2172.16 392.709   1
   1  -9   4 1767.39 493.467   1
  -1   9  -4 2064.32 389.002   1
   1  -9   5 4645.73 764.880   1
  -1   9  -5 4783.83 616.423   1
  -1   9  -6 335.976 186.567   1
   1  -9   6 641.399 321.510   1
   1  -9   7 4977.64 782.696   1
   1  -8   1 828.415 356.264   1
  -1   8  -1 915.189 261.617   1
  -1   8  -2 295.426 155.699   1
   1  -8   2-156.057 177.456   1
   1  -8   3-16.6381 151.228   1
  -1   8  -3 15.9142 85.8411   1
   1  -8   4 971.660 334.191   1
  -1   8  -4 746.794 229.789   1
   1  -8   5 130.971 178.259   1
  -1   8  -5 134.166 133.057   1
  -1   8  -6 851.928 250.321   1
   1  -8   6 508.709 256.382   1
   1  -8   7 8198.60 875.428   1
  -1   8  -7 9419.19 787.790   1
   1  -8   8 806.477 301.218   1
  -1   8  -8 1287.51 319.448   1
  -1   7   0 198.732 125.020   1
   1  -7   1 609.929 251.391   1
  -1   7  -1 365.163 162.146   1
  -1   7  -2 851.710 220.735   1
   1  -7   2 674.512 262.042   1
  -1   7  -3 1187.64 252.174   1
   1  -7   3 953.587 292.878   1
   1  -7   4 25686.7 1417.53   1
  -1   7  -4 23223.2 1134.58   1
   1  -7   5 667.964 245.288   1
  -1   7  -5 785.112 227.683   1
  -1   7  -6 337.331 158.867   1
   1  -7   6 529.059 218.033   1
  -1   7  -7 3842.18 474.850   1
   1  -7   7 3722.62 538.971   1
  -1   7  -8 516.644 202.510   1
   1  -7   8-93.1368 151.777   1
   1  -7   9 888.095 316.195   1
  -1   7  -9 222.819 151.726   1
   1  -7  10 3282.47 569.055   1
  -1   6   0-18.5344 65.7603   1
   1  -6   0 1559.34 382.188   1
  -1   6  -1 17119.2 909.130   1
   1  -6   1 19446.9 1110.99   1
   1  -6   2 5604.93 610.249   1
  -1   6  -2 6099.67 516.417   1
   1  -6   3 9305.17 771.052   1
  -1   6  -3 8674.16 601.802   1
   1  -6   4 2145.79 358.784   1
  -1   6  -4 1881.46 309.252   1
  -1   6  -5 15635.5 861.288   1
   1  -6   5 16293.9 973.822   1
   1  -6   6 2060.88 380.656   1
  -1   6  -6 2321.86 340.473   1
   1  -6   7 359.457 182.254   1
  -1   6  -7 224.404 132.873   1
   1  -6   8 997.458 276.590   1
  -1   6  -8 945.814 239.076   1
   1  -6   9 12067.2 915.814   1
  -1   6  -9 11959.4 809.894   1
   1  -6  10 1433.83 335.590   1
  -1   6 -10 1618.61 321.165   1
   1  -6  11 61.4831 124.902   1
  -1   5   0 3817.76 399.228   1
   1  -5   0 3819.81 488.884   1
  -1   5  -1 33036.9 1152.36   1
   1  -5   1 31229.9 1323.76   1
   1  -5   2 12978.8 809.347   1
  -1   5  -2 12200.2 653.996   1
   1  -5   3 31822.3 1185.01   1
  -1   5  -3 30767.7 1048.43   1
   1  -5   4 23644.9 1084.89   1
  -1   5  -4 24297.6 1001.01   1
  -1   5  -5 73.3157 78.5097   1
   1  -5   5-74.4012 91.3248   1
   1  -5   6 12345.2 785.346   1
  -1   5  -6 12398.3 720.590   1
  -1   5  -7-28.4243 73.5037   1
   1  -5   7 5.95606 71.9215   1
  -1   5  -8 4538.63 458.398   1
   1  -5   8 4576.56 504.857   1
  -1   5  -9 1244.14 259.352   1
   1  -5   9 1303.56 285.012   1
   1  -5  10 12.5289 89.6883   1
   1  -5  11 2288.79 393.696   1
   1  -5  12 443.108 202.260   1
  -1   4   0 54830.8 1352.55   1
   1  -4   0 57614.9 1519.73   1
   1  -4   1 59408.2 1538.34   1
  -1   4  -1 58314.8 1381.47   1
   1  -4   2-36.1184 54.8801   1
  -1   4  -2 30.9904 47.0807   1
  -1   4  -3 11747.7 620.614   1
   1  -4   3 11897.0 682.572   1
   1  -4   4 5746.15 458.930   1
  -1   4  -4 5805.78 433.294   1
   1  -4   5 3841.62 380.738   1
  -1   4  -5 4059.30 369.674   1
   1  -4   6 899.588 194.396   1
  -1   4  -6 840.532 181.912   1
   1  -4   7 55.3569 77.3570   1
  -1   4  -7 13.5978 58.7775   1
   1  -4   8 187.466 119.091   1
  -1   4  -8 445.250 148.046   1
   1  -4   9 812.418 226.119   1
   1  -4  10 485.180 192.639   1
   1  -4  11 4861.42 570.983   1
   1  -4  12 636.325 233.612   1
   1  -4  13 366.899 196.961   1
  -1   3   0 117438. 1706.65   1
   1  -3   0 114082. 1897.50   1
  -1   3  -1 26276.3 771.719   1
   1  -3   1 26564.6 828.667   1
   1  -3   2 6286.79 418.739   1
  -1   3  -2 7326.40 399.844   1
  -1   3  -3 1670.74 206.370   1
   1  -3   3 1618.43 204.803   1
  -1   3  -4 12532.6 568.096   1
   1  -3   4 12483.2 584.480   1
  -1   3  -5 55941.7 1255.44   1
   1  -3   5 52582.9 1332.20   1
  -1   3  -6 2347.40 266.903   1
   1  -3   6 2301.70 295.113   1
   1  -3   7 7503.77 542.118   1
  -1   3  -7 7670.07 503.700   1
   1  -3   8 73.7439 79.1419   1
   1  -3   9 6999.84 561.217   1
   1  -3  10 751.024 202.485   1
   1  -3  11 5858.80 558.695   1
   1  -3  12 102.409 110.882   1
   1  -2   0 46572.2 956.180   1
  -1   2   0 46926.4 872.692   1
   1  -2   1 13184.6 494.120   1
  -1   2  -1 14283.5 457.861   1
  -1   2  -2 18363.6 570.580   1
   1  -2   2 17968.6 549.591   1
   1  -2   3 564.321 113.618   1
  -1   2  -3 631.868 109.539   1
   1  -2   4 40062.4 951.141   1
  -1   2  -4 38429.6 897.002   1
   1  -2   5 6333.68 399.695   1
  -1   2  -5 6630.23 393.859   1
   1  -2   6 8071.50 476.343   1
   1  -2   7 1012.51 182.240   1
   1  -2   8 606.071 152.788   1
   1  -2   9 2788.92 334.057   1
   1  -2  10 395.792 145.047   1
  -1   1   0 84.2319 28.8975   1
   1  -1   0 72.5298 26.2165   1
  -1   1  -1 37728.6 607.607   1
   1  -1   1 37311.0 615.807   1
   1  -1   2 53569.3 794.806   1
  -1   1  -2 56168.6 811.197   1
  -1   1  -3 272.428 63.0937   1
   1  -1   3 287.819 68.7579   1
   1  -1   4 58880.5 1010.51   1
   1  -1   5 2882.97 239.485   1
   1  -1   6 37533.3 922.325   1
   1  -1   7 1014.17 165.620   1
  -1  -1   7 9537.06 448.108   1
  -1  -1   6 96.7718 49.0664   1
  -1  -1   5 799.892 111.530   1
  -1  -1   4 36652.6 681.759   1
   1   1  -3 7371.38 257.533   1
  -1  -1   3 7457.65 272.446   1
  -1  -1   2 1888.67 121.837   1
   1   1  -2 2080.98 121.873   1
  -1  -2  11 9154.88 603.788   1
  -1  -2  10 3075.24 336.699   1
  -1  -2   9 15792.4 715.158   1
  -1  -2   8 8141.67 486.137   1
  -1  -2   7 247.868 88.7086   1
  -1  -2   6 498.195 112.313   1
  -1  -2   5 2536.17 229.097   1
   1   2  -5 2414.11 210.148   1
  -1  -2   4 1052.21 143.974   1
   1   2  -4 1061.78 132.093   1
   1   2  -3 1188.95 129.424   1
  -1  -2   3 1165.42 130.661   1
   1   2  -2 14516.0 416.285   1
  -1  -2   2 12944.3 449.629   1
  -1  -2   1 32274.8 755.214   1
   1   2  -1 34073.5 654.592   1
  -1  -3  13 429.311 173.080   1
  -1  -3  12-38.8184 88.5216   1
  -1  -3  11 1794.49 295.485   1
  -1  -3  10 3000.18 361.847   1
  -1  -3   9 1646.10 261.775   1
  -1  -3   8 23.1218 63.4628   1
   1   3  -7 1650.08 215.557   1
  -1  -3   7 1342.13 222.253   1
  -1  -3   6 855.891 168.956   1
   1   3  -6 883.127 151.691   1
   1   3  -5 3077.27 268.582   1
  -1  -3   5 3033.10 276.523   1
  -1  -3   4 1075.82 160.747   1
   1   3  -4 909.486 141.475   1
  -1  -3   3 111103. 1678.28   1
   1   3  -3 110067. 1535.84   1
  -1  -3   2 5828.34 372.011   1
   1   3  -2 6032.33 334.299   1
  -1  -3   1 1706.57 212.042   1
   1   3  -1 1661.47 189.303   1
  -1  -4  14 907.957 273.348   1
  -1  -4  13 36.9837 112.150   1
  -1  -4  12 1680.16 332.540   1
  -1  -4  11 960.657 246.451   1
  -1  -4  10 4380.48 476.183   1
  -1  -4   9 1654.00 280.611   1
   1   4  -8 10972.7 615.779   1
  -1  -4   8 11382.0 671.037   1
  -1  -4   7 9737.58 605.849   1
   1   4  -7 9300.45 541.366   1
  -1  -4   6 9213.75 565.466   1
   1   4  -6 9295.45 535.927   1
  -1  -4   5 181.898 94.4839   1
   1   4  -5 361.145 108.868   1
   1   4  -4 6547.08 434.007   1
  -1  -4   4 6444.95 480.668   1
  -1  -4   3 123468. 1996.51   1
   1   4  -3 128002. 1755.88   1
   1   4  -2 63104.6 1304.93   1
  -1  -4   2 69419.6 1585.89   1
  -1  -4   1 6342.44 513.645   1
   1   4  -1 6275.52 431.918   1
  -1  -5  13 304.437 173.725   1
  -1  -5  12 1031.85 270.221   1
  -1  -5  11 320.036 163.986   1
  -1  -5  10 744.289 219.873   1
  -1  -5   9 990.987 236.852   1
   1   5  -9 612.004 174.199   1
   1   5  -8 1850.17 274.740   1
  -1  -5   8 1749.30 301.646   1
  -1  -5   7 298.025 140.561   1
   1   5  -7 229.646 110.576   1
  -1  -5   6 2304.20 347.986   1
   1   5  -6 2574.81 306.139   1
   1   5  -5 9552.00 576.418   1
  -1  -5   5 9736.46 654.853   1
  -1  -5   4 70.0233 83.4710   1
   1   5  -4 108.862 81.3787   1
  -1  -5   3 1487.26 274.015   1
   1   5  -3 1389.27 214.082   1
  -1  -5   2 17077.7 929.947   1
   1   5  -2 15398.5 756.935   1
   1   5  -1 135948. 2254.53   1
  -1  -5   1 132543. 2878.46   1
  -1  -6  12 5344.34 636.132   1
  -1  -6  11 203.449 161.836   1
  -1  -6  10-134.866 140.972   1
   1   6 -10 86.4393 105.592   1
   1   6  -9 99.2482 103.061   1
  -1  -6   9-168.172 148.796   1
  -1  -6   8 39.0942 114.369   1
   1   6  -8 186.036 118.478   1
   1   6  -7 2007.46 306.786   1
  -1  -6   7 1966.90 353.955   1
  -1  -6   6 94.0673 108.197   1
   1   6  -6 58.9085 80.9433   1
   1   6  -5 1189.08 236.055   1
  -1  -6   5 1010.08 251.851   1
  -1  -6   4 4084.10 502.287   1
   1   6  -4 3669.02 385.563   1
  -1  -6   3 2561.52 419.617   1
   1   6  -3 2595.16 317.660   1
   1   6  -2 14650.7 811.975   1
  -1  -6   2 17106.3 1012.07   1
   1   6  -1 3054.66 374.404   1
  -1  -7  11 4478.15 649.408   1
   1   7 -11 5185.33 564.288   1
  -1  -7  10 716.515 276.314   1
   1   7 -10 694.566 219.519   1
   1   7  -9 1008.68 248.470   1
  -1  -7   9 676.076 252.425   1
  -1  -7   8 353.234 191.459   1
   1   7  -8 681.053 212.887   1
   1   7  -7 2333.53 350.608   1
  -1  -7   7 2514.97 433.584   1
   1   7  -6 16901.1 915.402   1
  -1  -7   6 17687.0 1137.32   1
   1   7  -5 135.685 114.908   1
  -1  -7   5 55.0469 135.590   1
   1   7  -4 3532.87 401.640   1
  -1  -7   4 3429.24 534.374   1
   1   7  -3 6005.12 528.031   1
  -1  -7   3 6734.92 709.192   1
  -1  -7   2 372.199 224.027   1
   1   7  -2 195.894 126.081   1
   1   7  -1 13108.0 829.124   1
  -1  -8  10 239.451 201.501   1
   1   8  -9 1415.38 315.200   1
  -1  -8   9 1303.39 370.501   1
  -1  -8   8 358.502 228.828   1
   1   8  -8 378.926 179.135   1
   1   8  -7 300.102 158.844   1
  -1  -8   7 141.427 184.594   1
   1   8  -6 85.3661 112.532   1
  -1  -8   6 6.79641 143.757   1
  -1  -8   5 1583.80 419.570   1
   1   8  -5 1418.00 304.253   1
   1   8  -4 1818.96 314.985   1
  -1  -8   4 2015.68 446.504   1
   1   8  -3 9350.66 712.918   1
  -1  -8   3 10148.0 981.163   1
   1   8  -2 5308.98 584.558   1
  -1  -8   2 5632.18 821.299   1
  -1  -9   8 40.7755 190.936   1
   1   9  -8-47.1343 117.004   1
   1   9  -7 32.4413 109.338   1
  -1  -9   7-38.6435 193.016   1
   1   9  -6 1741.20 358.702   1
  -1  -9   6 1801.77 496.571   1
  -1  -9   5-258.801 235.669   1
   1   9  -5 185.279 151.543   1
   1   9  -4 1134.17 273.776   1
  -1  -9   4 1581.25 447.665   1
   1   9  -3 16.5649 93.3267   1
  -1  -9   3-196.112 262.736   1
   1   9  -2 1083.98 297.995   1
  -1 -10   6 1329.14 450.336   1
   1  10  -6 898.909 289.503   1
   1  10  -5 1501.60 359.965   1
  -1 -10   5 1916.04 544.538   1
  -1 -10   4 406.705 349.006   1
   1  10  -4 641.297 231.046   1
   1  10  -3 2234.84 407.749   1
   1  11  -3 2299.64 439.245   1
  -2  10  -1 1631.38 380.216   1
   2 -10   2-261.548 321.311   1
  -2  10  -2-53.2925 121.997   1
   2 -10   3 14349.4 1399.78   1
  -2  10  -3 8807.87 825.058   1
   2 -10   4 2861.82 645.501   1
   2  -9   1 27.8431 220.258   1
  -2   9  -1 133.828 135.594   1
  -2   9  -2 1576.11 337.698   1
   2  -9   2 1647.55 465.244   1
  -2   9  -3 577.059 216.658   1
   2  -9   3 513.647 297.535   1
   2  -9   4 306.636 267.799   1
  -2   9  -4 223.047 167.522   1
   2  -9   5 1075.90 393.040   1
  -2   9  -5 663.069 254.463   1
   2  -9   6 2707.72 593.511   1
  -2   8   0 5645.99 598.938   1
   2  -8   1 628.822 298.873   1
  -2   8  -1 510.521 202.731   1
  -2   8  -2 199.764 133.711   1
   2  -8   2 619.975 280.876   1
   2  -8   3 2873.26 563.079   1
  -2   8  -3 2914.39 418.135   1
  -2   8  -4 2557.90 427.481   1
   2  -8   4 2588.26 522.770   1
   2  -8   5 347.787 233.642   1
  -2   8  -5 519.054 211.257   1
  -2   8  -6 622.961 225.584   1
   2  -8   6 342.341 222.320   1
  -2   8  -7 56.6771 115.331   1
   2  -8   7 335.281 217.610   1
   2  -8   8 2510.61 496.160   1
  -2   7   0 23739.9 1127.36   1
   2  -7   0 22113.4 1514.66   1
  -2   7  -1 349.507 159.586   1
   2  -7   1 490.965 224.489   1
  -2   7  -2 982.883 232.835   1
   2  -7   2 1276.57 353.669   1
  -2   7  -3 14410.6 856.598   1
   2  -7   3 14064.9 1069.00   1
   2  -7   4 1079.65 305.839   1
  -2   7  -4 940.148 252.766   1
  -2   7  -5 16.1942 86.8809   1
   2  -7   5 219.295 161.356   1
  -2   7  -6 117.528 116.656   1
   2  -7   6 90.5000 132.593   1
   2  -7   7 190.802 170.754   1
  -2   7  -7 153.364 131.548   1
   2  -7   8 839.006 302.329   1
  -2   7  -8 706.374 233.686   1
   2  -7   9 1086.76 346.693   1
  -2   7  -9-5.68949 97.2089   1
  -2   6   0 27308.1 1115.09   1
   2  -6   0 28665.2 1446.25   1
   2  -6   1 1033.88 289.508   1
  -2   6  -1 1029.35 228.992   1
   2  -6   2 8783.44 767.044   1
  -2   6  -2 9101.51 628.834   1
  -2   6  -3 170.517 107.498   1
   2  -6   3-132.460 122.199   1
  -2   6  -4 2470.46 362.981   1
   2  -6   4 2467.93 386.317   1
  -2   6  -5 8865.28 666.732   1
   2  -6   5 8219.16 732.229   1
   2  -6   6 1084.47 291.615   1
  -2   6  -6 1375.13 274.445   1
   2  -6   7 8823.17 777.576   1
  -2   6  -7 10731.3 788.174   1
   2  -6   8 3611.89 511.316   1
  -2   6  -8 3270.14 440.433   1
  -2   6  -9 1922.46 345.755   1
   2  -6   9 1841.87 376.888   1
   2  -6  10 1950.82 394.280   1
  -2   6 -10 1957.20 362.397   1
  -2   5   1 28779.7 1153.53   1
  -2   5   0 3495.16 366.872   1
   2  -5   0 3710.42 449.375   1
  -2   5  -1 2318.46 303.587   1
   2  -5   1 2658.04 383.505   1
  -2   5  -2 1234.66 219.289   1
   2  -5   2 1231.69 254.151   1
  -2   5  -3 3237.48 371.744   1
   2  -5   3 3524.27 408.957   1
  -2   5  -4 125.251 93.7119   1
   2  -5   4 74.0752 97.7198   1
  -2   5  -5 467.432 153.581   1
   2  -5   5-182.870 120.376   1
  -2   5  -6 137.515 101.811   1
   2  -5   6 230.159 128.874   1
   2  -5   7 472.373 175.165   1
  -2   5  -7 472.497 165.781   1
  -2   5  -8 905.447 221.844   1
   2  -5   8 795.959 229.230   1
  -2   5  -9 60.7827 97.5112   1
   2  -5   9 170.365 130.410   1
   2  -5  10 4188.01 523.918   1
   2  -5  11-161.761 143.708   1
   2  -4  -1 50940.1 1719.29   1
  -2   4   1 55103.6 1445.29   1
   2  -4   0 993.494 222.008   1
  -2   4   0 1152.34 191.532   1
  -2   4  -1 31033.1 976.014   1
   2  -4   1 32106.5 1132.06   1
  -2   4  -2 5196.05 391.752   1
   2  -4   2 5488.65 448.034   1
   2  -4   3 62.0619 70.3516   1
  -2   4  -3 4.93832 47.8836   1
   2  -4   4 33603.2 1127.99   1
  -2   4  -4 34129.6 1083.96   1
   2  -4   5 14.4194 59.5032   1
  -2   4  -5-3.39814 52.3421   1
   2  -4   6 5599.31 486.060   1
  -2   4  -6 5562.88 468.661   1
   2  -4   7 49937.9 1542.52   1
  -2   4  -7 51235.1 1433.43   1
  -2   4  -8 3780.04 413.232   1
   2  -4   8 3267.38 429.306   1
   2  -4   9 3995.16 498.060   1
   2  -4  10 349.891 175.371   1
   2  -4  11 8240.68 759.550   1
   2  -4  12 247.056 168.865   1
   2  -3  -1 1171.64 227.165   1
  -2   3   1 788.254 154.625   1
   2  -3   0 52.9781 55.3387   1
  -2   3   0 52.4432 45.9326   1
  -2   3  -1 1163.37 163.881   1
   2  -3   1 1192.49 179.982   1
   2  -3   2 983.058 169.372   1
  -2   3  -2 998.295 166.578   1
  -2   3  -3 30321.5 898.213   1
   2  -3   3 30410.6 931.170   1
   2  -3   4 13730.6 654.483   1
  -2   3  -4 14099.5 631.398   1
  -2   3  -5 7579.71 487.093   1
   2  -3   5 6555.83 497.606   1
  -2   3  -6 10653.3 588.979   1
   2  -3   6 10188.6 639.607   1
  -2   3  -7 6114.61 469.741   1
   2  -3   7 5989.90 502.465   1
   2  -3   8 3493.27 397.677   1
   2  -3   9 1274.00 255.457   1
   2  -3  10 4749.43 501.054   1
   2  -3  11 577.139 195.811   1
   2  -3  12 1997.41 358.587   1
   2  -2  -1 1345.10 192.152   1
  -2   2   1 1227.44 159.206   1
   2  -2   0 21870.3 647.847   1
  -2   2   0 20204.5 597.524   1
   2  -2   1 6232.55 343.278   1
  -2   2  -1 6439.40 332.927   1
   2  -2   2 17671.2 583.534   1
  -2   2  -2 18259.1 588.088   1
  -2   2  -3 10275.2 467.486   1
   2  -2   3 10330.3 499.671   1
  -2   2  -4 3092.22 268.006   1
   2  -2   4 3114.42 281.507   1
   2  -2   5 3170.51 299.003   1
  -2   2  -5 3382.82 297.503   1
   2  -2   6 46244.9 1192.06   1
   2  -2   7 2848.44 313.699   1
   2  -2   8 3165.43 350.052   1
   2  -2   9 82.3852 81.7982   1
  -2   1   1 50927.5 759.521   1
   2  -1  -1 51281.0 860.783   1
   2  -1   0 18411.8 445.578   1
  -2   1   0 19868.7 426.417   1
   2  -1   1 31.2317 24.2344   1
  -2   1  -1 37.0771 23.6405   1
  -2   1  -2 81586.2 1063.02   1
   2  -1   2 81858.8 1080.18   1
   2  -1   3 53436.3 973.265   1
  -2   1  -3 52669.3 922.044   1
   2  -1   4 3556.14 267.523   1
   2  -1   5 1738.06 199.978   1
   2  -1   6 19080.8 695.693   1
   2  -1   7 906.656 165.077   1
   2   0   1 10254.6 271.636   1
  -2  -1   8 469.232 106.386   1
  -2  -1   7 915.146 133.822   1
  -2  -1   6 7067.25 334.058   1
  -2  -1   5 10064.1 363.179   1
  -2  -1   4 314.224 60.0116   1
  -2  -1   3 305858. 1529.08   1
  -2  -2  11 4271.92 396.966   1
  -2  -2  10 3563.43 345.295   1
  -2  -2   9 466.000 126.469   1
  -2  -2   8 2296.62 249.978   1
  -2  -2   7 700.414 134.119   1
  -2  -2   6 17668.1 607.835   1
  -2  -2   5 57507.3 1050.87   1
   2   2  -4 46763.2 776.554   1
  -2  -2   4 47521.7 860.657   1
   2   2  -3 30575.5 589.101   1
  -2  -2   3 31121.4 647.822   1
   2   2  -2 1089.96 105.813   1
  -2  -2   2 1210.44 134.849   1
   2   2  -1 2981.80 208.891   1
  -2  -3  13 2180.71 344.781   1
  -2  -3  12 785.958 207.416   1
  -2  -3  11 1396.32 257.582   1
  -2  -3  10 1934.69 288.936   1
  -2  -3   9 6372.79 497.266   1
  -2  -3   8 39348.1 1182.90   1
  -2  -3   7 463.976 130.721   1
  -2  -3   6 6595.39 410.800   1
   2   3  -6 6550.28 382.604   1
   2   3  -5 12007.4 493.896   1
  -2  -3   5 12495.1 540.393   1
  -2  -3   4 3159.13 270.040   1
   2   3  -4 2805.14 229.262   1
  -2  -3   3 9355.95 447.416   1
   2   3  -3 9540.54 416.485   1
   2   3  -2 2851.33 229.995   1
  -2  -3   2 3080.68 290.545   1
   2   3  -1 31297.3 850.733   1
  -2  -4  15-8.20604 106.875   1
  -2  -4  14 1723.30 344.037   1
  -2  -4  13 288.921 159.970   1
  -2  -4  12-3.75883 88.0873   1
  -2  -4  11 208.742 127.700   1
  -2  -4  10 1404.98 258.327   1
  -2  -4   9-3.82203 64.8542   1
  -2  -4   8 340.655 128.790   1
   2   4  -8 317.124 112.389   1
  -2  -4   7 3902.40 370.792   1
   2   4  -7 3474.67 318.387   1
  -2  -4   6 16734.6 760.881   1
   2   4  -6 18948.4 719.947   1
  -2  -4   5 611.396 158.059   1
   2   4  -5 647.437 134.152   1
   2   4  -4 4148.39 331.746   1
  -2  -4   4 4156.24 358.153   1
   2   4  -3 16442.7 614.064   1
  -2  -4   3 16167.2 752.699   1
   2   4  -2 29927.9 889.996   1
  -2  -4   2 33579.6 1075.09   1
   2   4  -1-23.2073 50.3206   1
  -2  -5  14 1337.71 320.253   1
  -2  -5  13 640.406 227.146   1
  -2  -5  12 419.813 182.263   1
  -2  -5  11 1007.65 248.905   1
  -2  -5  10 707.084 207.667   1
  -2  -5   9 5032.99 506.002   1
   2   5  -9 4894.03 439.519   1
  -2  -5   8 63.0619 94.6371   1
   2   5  -8 18.0042 64.9389   1
   2   5  -7 5071.76 424.066   1
  -2  -5   7 4553.67 483.951   1
   2   5  -6 9702.69 562.483   1
  -2  -5   6 10134.7 670.477   1
  -2  -5   5-6.62164 66.4635   1
   2   5  -5-26.2639 58.0914   1
  -2  -5   4 10989.2 714.131   1
   2   5  -4 10157.1 571.012   1
   2   5  -3 589.233 138.117   1
  -2  -5   3 129.264 112.187   1
  -2  -5   2 3689.33 452.736   1
   2   5  -2 3996.95 363.637   1
   2   5  -1 21274.5 917.717   1
  -2  -6  13 2502.48 452.463   1
  -2  -6  12 2275.72 420.256   1
  -2  -6  11 102.907 135.424   1
  -2  -6  10 471.880 211.351   1
   2   6 -10 385.009 155.018   1
  -2  -6   9 1379.36 319.675   1
   2   6  -9 1174.66 238.826   1
  -2  -6   8 176.888 138.702   1
   2   6  -8-35.5165 80.8139   1
   2   6  -7 3718.86 398.549   1
  -2  -6   7 4042.10 474.008   1
   2   6  -6 5662.41 473.063   1
  -2  -6   6 5397.88 554.670   1
   2   6  -5 8349.19 588.098   1
  -2  -6   5 9662.92 760.185   1
  -2  -6   4 118.064 129.424   1
   2   6  -4-17.0362 59.7929   1
  -2  -6   3 2520.67 388.233   1
   2   6  -3 2161.28 287.982   1
  -2  -6   2 7586.74 770.781   1
   2   6  -2 7068.51 533.074   1
   2   6  -1 12250.7 766.098   1
  -2  -7  12 108.077 167.977   1
  -2  -7  11-98.3126 152.530   1
  -2  -7  10 674.099 251.051   1
   2   7 -10 365.019 165.888   1
  -2  -7   9 1236.55 315.079   1
   2   7  -9 938.965 230.938   1
   2   7  -8 155.054 120.222   1
  -2  -7   8 101.399 142.287   1
  -2  -7   7 9751.52 852.198   1
   2   7  -7 9238.02 660.830   1
  -2  -7   6 1734.04 377.593   1
   2   7  -6 1798.86 297.248   1
  -2  -7   5 23376.6 1347.63   1
   2   7  -5 21928.7 1045.14   1
   2   7  -4 2671.99 340.903   1
  -2  -7   4 3221.43 496.774   1
  -2  -7   3 1471.42 367.756   1
   2   7  -3 1478.60 267.315   1
   2   7  -2 389.621 153.837   1
  -2  -8  11 4430.38 656.511   1
   2   8 -10 5840.78 593.606   1
  -2  -8  10 5251.69 709.948   1
  -2  -8   9 39.5189 162.984   1
   2   8  -9-149.289 133.252   1
  -2  -8   8 3637.38 598.884   1
   2   8  -8 3840.63 478.123   1
  -2  -8   7-23.0999 153.541   1
   2   8  -7-4.02707 86.9351   1
  -2  -8   6 10857.2 1032.18   1
   2   8  -6 11587.3 803.155   1
   2   8  -5 443.259 180.154   1
  -2  -8   5 1113.12 347.736   1
   2   8  -4 3074.73 400.115   1
  -2  -8   4 3820.75 600.946   1
   2   8  -3 4101.24 473.346   1
  -2  -8   3 3714.69 669.843   1
   2   8  -2 368377. 4628.18   1
  -2  -9   9 607.729 318.460   1
   2   9  -9 1468.50 328.463   1
   2   9  -8-240.788 160.263   1
  -2  -9   8 1268.09 431.851   1
   2   9  -7 256.571 159.605   1
  -2  -9   7-292.928 263.629   1
   2   9  -6 231.163 158.606   1
  -2  -9   6-76.7941 191.160   1
   2   9  -5 52.7549 112.422   1
  -2  -9   5-288.037 245.510   1
   2   9  -4 5759.35 586.595   1
  -2  -9   4 6002.18 912.019   1
   2   9  -3 12599.4 880.616   1
   2   9  -2 2785.99 449.720   1
  -2 -10   7 1202.08 431.790   1
   2  10  -7 2287.60 418.081   1
  -2 -10   6 4976.52 831.648   1
   2  10  -6 4552.29 597.981   1
   2  10  -5 4532.32 582.955   1
  -2 -10   5 4331.50 852.456   1
   2  10  -4 974.003 273.863   1
   2  10  -3 2650.46 440.904   1
   2  11  -4 199.641 165.475   1
  -3  10  -1 928.217 293.473   1
   3 -10   1 3279.65 805.808   1
  -3  10  -2 4586.14 617.453   1
   3 -10   2 4695.27 871.459   1
   3 -10   3 2627.84 614.881   1
  -3   9   0 406.102 207.661   1
  -3   9  -1 435.890 200.681   1
   3  -9   1 364.344 300.162   1
  -3   9  -2 7530.84 734.085   1
   3  -9   2 8956.28 1021.81   1
   3  -9   3 2349.94 576.074   1
  -3   9  -3 3310.00 494.706   1
   3  -9   4 428.124 290.990   1
  -3   9  -4 672.520 262.337   1
   3  -9   5 2438.90 575.106   1
  -3   8   0 14111.1 995.048   1
   3  -8   0 14031.9 1347.43   1
   3  -8   1 566.751 271.619   1
  -3   8  -1 641.248 217.767   1
   3  -8   2 299.462 232.404   1
  -3   8  -2 25.5723 93.0157   1
  -3   8  -3 799.065 242.205   1
   3  -8   3 813.295 319.639   1
   3  -8   4 4931.20 719.978   1
  -3   8  -4 4132.64 556.758   1
   3  -8   5 7049.76 845.891   1
  -3   8  -5 6810.79 695.679   1
   3  -8   6 6664.35 811.438   1
  -3   8  -6 7003.97 709.132   1
   3  -8   7 2254.56 479.095   1
  -3   7   1 1927.61 334.370   1
   3  -7   0 4103.06 629.778   1
  -3   7   0 3603.92 473.123   1
   3  -7   1 466.006 235.189   1
  -3   7  -1 414.320 166.226   1
  -3   7  -2 605.392 193.244   1
   3  -7   2 515.685 237.936   1
  -3   7  -3 16164.0 962.963   1
   3  -7   3 18222.8 1231.54   1
  -3   7  -4 11844.7 862.772   1
   3  -7   4 10917.7 927.556   1
   3  -7   5 92.7172 132.548   1
  -3   7  -5 248.624 148.339   1
  -3   7  -6 3165.11 449.884   1
   3  -7   6 3382.14 529.554   1
  -3   7  -7 407.842 189.282   1
   3  -7   7 163.905 173.078   1
   3  -7   8 3729.84 612.825   1
  -3   7  -8 4370.09 555.924   1
   3  -6  -1 730.900 292.131   1
  -3   6   1 798.404 206.218   1
  -3   6   0 209.128 124.183   1
   3  -6   0 461.925 200.146   1
   3  -6   1 559.676 225.683   1
  -3   6  -1 985.732 221.080   1
  -3   6  -2 102.411 90.8876   1
   3  -6   2 13.6881 98.3820   1
   3  -6   3 29694.5 1362.54   1
  -3   6  -3 29982.8 1250.77   1
   3  -6   4 10056.5 789.316   1
  -3   6  -4 9297.95 702.993   1
  -3   6  -5 1139.90 254.429   1
   3  -6   5 153.093 140.298   1
   3  -6   6 12360.1 942.151   1
  -3   6  -6 15778.1 925.152   1
  -3   6  -7 1295.99 289.361   1
   3  -6   7 1001.41 284.199   1
  -3   6  -8 846.631 240.701   1
   3  -6   8 645.208 238.345   1
   3  -6   9 221.178 166.002   1
  -3   6  -9 403.445 182.573   1
   3  -6  10 4777.30 619.464   1
  -3   5   1 3508.60 383.525   1
   3  -5  -1 3642.28 519.803   1
   3  -5   0 16930.4 1017.49   1
  -3   5   0 17200.6 868.344   1
   3  -5   1 2208.68 358.136   1
  -3   5  -1 2849.90 331.632   1
  -3   5  -2 2650.75 321.368   1
   3  -5   2 2395.53 348.906   1
   3  -5   3 2336.34 351.209   1
  -3   5  -3 2158.40 318.102   1
  -3   5  -4 5960.47 512.123   1
   3  -5   4 5075.43 535.641   1
   3  -5   5 18058.0 990.864   1
  -3   5  -5 17769.9 895.527   1
   3  -5   6 13458.3 853.079   1
  -3   5  -6 14751.3 867.798   1
   3  -5   7 2451.82 384.281   1
  -3   5  -7 2130.30 337.297   1
   3  -5   8 1061.65 267.204   1
  -3   5  -8 1025.97 243.506   1
  -3   5  -9 123.141 117.663   1
   3  -5   9 200.896 142.277   1
   3  -5  10 107.039 126.202   1
   3  -5  11 1108.85 306.503   1
  -3   4   1 165.794 86.0138   1
   3  -4  -1-61.6063 86.2794   1
   3  -4   0 43994.3 1407.19   1
  -3   4   0 37961.4 1146.05   1
  -3   4  -1 1877.69 244.627   1
   3  -4   1 1772.08 269.570   1
   3  -4   2 37845.1 1253.51   1
  -3   4  -2 39707.4 1179.60   1
  -3   4  -3 4511.26 405.739   1
   3  -4   3 3985.75 406.806   1
   3  -4   4 2393.45 313.219   1
  -3   4  -4 2037.88 278.885   1
   3  -4   5 14444.9 786.060   1
  -3   4  -5 15136.5 782.429   1
   3  -4   6 11458.2 723.471   1
  -3   4  -6 11125.7 688.145   1
  -3   4  -7 12474.4 736.162   1
   3  -4   7 11863.1 786.042   1
  -3   4  -8 257.973 130.103   1
   3  -4   8 112.135 113.883   1
   3  -4   9 1257.74 298.566   1
   3  -4  10 304.009 173.871   1
   3  -4  11 994.617 289.511   1
   3  -4  12 3058.57 502.295   1
  -3   3   2 48718.6 1275.69   1
   3  -3  -1 602.801 150.823   1
  -3   3   1 538.382 119.705   1
   3  -3   0 34087.8 1064.97   1
  -3   3   0 30531.2 877.611   1
   3  -3   1 125.931 74.0264   1
  -3   3  -1 221.861 79.2097   1
   3  -3   2 1874.39 238.276   1
  -3   3  -2 1701.23 224.409   1
   3  -3   3 1440.23 212.932   1
  -3   3  -3 32.1162 48.9100   1
   3  -3   4 15972.4 741.166   1
  -3   3  -4 16730.6 731.459   1
  -3   3  -5 1746.81 246.775   1
   3  -3   5 1585.07 259.901   1
   3  -3   6-19.5858 63.5198   1
  -3   3  -6 53.1137 65.5628   1
  -3   3  -7 1987.79 282.095   1
   3  -3   7 1839.36 293.714   1
   3  -3   8 1504.52 275.237   1
   3  -3   9 6534.65 583.876   1
   3  -3  10 2025.85 344.140   1
   3  -3  11 385.954 173.038   1
  -3   2   2 2528.33 248.664   1
   3  -2  -1 14044.7 613.269   1
  -3   2   1 15500.0 526.047   1
   3  -2   0 49990.2 1001.09   1
  -3   2   0 48071.1 916.463   1
   3  -2   1 106.479 53.0342   1
  -3   2  -1 108.565 53.7921   1
   3  -2   2 42690.4 980.139   1
  -3   2  -2 43877.6 961.478   1
  -3   2  -3 4110.11 318.629   1
   3  -2   3 3723.55 318.658   1
  -3   2  -4 2802.22 266.447   1
   3  -2   4 2943.89 288.940   1
   3  -2   5 409.865 118.647   1
  -3   2  -5 607.651 136.681   1
   3  -2   6 18913.5 798.894   1
   3  -2   7 770.124 175.144   1
   3  -2   8 2503.93 323.681   1
   3  -2   9 1454.11 262.782   1
  -3   1   2 30137.3 660.325   1
   3  -1  -1 43591.0 808.838   1
  -3   1   1 45120.5 688.713   1
   3  -1   0 17181.5 461.403   1
  -3   1   0 16820.6 455.808   1
  -3   1  -1 4893.73 258.219   1
   3  -1   1 4897.41 279.113   1
  -3   1  -2 211.157 60.2987   1
   3  -1   2 243.799 67.1352   1
   3  -1   3 39740.8 885.434   1
  -3   1  -3 39445.7 850.589   1
   3  -1   4 26979.9 787.008   1
   3  -1   5 9269.68 492.288   1
   3  -1   6 22602.3 808.175   1
   3  -1   7 929.764 176.230   1
  -3   0   0 2063.92 114.170   1
   3   0   0 2232.90 126.012   1
   3   0   1 7936.07 273.974   1
   3   0   2 44.9946 27.8265   1
   3   0   3 46815.9 845.060   1
  -3  -1   9 8914.35 451.252   1
  -3  -1   8 42.8268 44.9805   1
  -3  -1   7 669.259 109.660   1
  -3  -1   6 23788.0 579.497   1
  -3  -1   5 9763.12 330.835   1
  -3  -1   4 25315.6 453.607   1
  -3  -2  12 128.773 93.0233   1
  -3  -2  11 341.521 121.763   1
  -3  -2  10 9921.52 551.678   1
  -3  -2   9 297.742 101.916   1
  -3  -2   8 3536.32 296.812   1
  -3  -2   7 2695.22 243.216   1
  -3  -2   6 226.265 75.7553   1
  -3  -2   5 7775.49 357.438   1
  -3  -2   4 9626.74 353.805   1
   3   2  -4 9350.36 314.689   1
   3   2  -3 205.260 45.5747   1
  -3  -2   3 287.028 64.1706   1
   3   2  -2 55043.4 666.609   1
  -3  -3  14 242.395 145.582   1
  -3  -3  13 190.975 128.523   1
  -3  -3  12 7144.75 579.176   1
  -3  -3  11 1728.88 280.046   1
  -3  -3  10 1217.77 229.939   1
  -3  -3   9 7902.68 531.146   1
  -3  -3   8 13802.1 652.585   1
  -3  -3   7 2853.39 272.829   1
   3   3  -6 4063.92 281.257   1
  -3  -3   6 4045.87 310.686   1
  -3  -3   5 1872.61 210.925   1
   3   3  -5 2034.38 190.624   1
   3   3  -4 5570.90 296.761   1
  -3  -3   4 6010.75 353.132   1
   3   3  -3 17957.6 516.748   1
  -3  -3   3 16390.2 633.158   1
   3   3  -2 104656. 1297.94   1
  -3  -4  14 38.2563 103.128   1
  -3  -4  13-145.517 120.377   1
  -3  -4  12 3267.90 397.054   1
  -3  -4  11 7449.64 568.929   1
  -3  -4  10 858.565 199.748   1
  -3  -4   9 90.7889 88.0978   1
  -3  -4   8-118.194 88.0763   1
   3   4  -7 7380.35 442.338   1
  -3  -4   7 6851.79 492.581   1
  -3  -4   6 21497.4 873.608   1
   3   4  -6 20389.2 709.669   1
   3   4  -5 5446.59 351.962   1
  -3  -4   5 5581.95 412.033   1
  -3  -4   4 546.294 147.871   1
   3   4  -4 482.518 113.220   1
   3   4  -3 49.5080 46.8682   1
  -3  -4   3-71.7611 74.5781   1
   3   4  -2 471.302 108.898   1
  -3  -5  14 1199.39 289.761   1
  -3  -5  13 12.2714 101.904   1
  -3  -5  12-62.3309 109.061   1
  -3  -5  11 274.885 150.046   1
  -3  -5  10 2486.41 367.943   1
  -3  -5   9 465.592 174.754   1
   3   5  -8 1865.59 256.170   1
  -3  -5   8 1672.05 300.227   1
  -3  -5   7 145.223 107.660   1
   3   5  -7 165.631 91.4978   1
   3   5  -6 6178.49 430.096   1
  -3  -5   6 5970.01 502.285   1
  -3  -5   5 7253.16 578.351   1
   3   5  -5 7232.93 459.865   1
   3   5  -4 29845.1 922.376   1
  -3  -5   4 28214.8 1180.80   1
  -3  -5   3 13041.7 809.793   1
   3   5  -3 13505.9 614.488   1
   3   5  -2 4819.15 380.544   1
  -3  -6  13 352.672 207.204   1
  -3  -6  12 452.988 220.931   1
  -3  -6  11 4108.77 546.670   1
  -3  -6  10 6.60465 109.340   1
   3   6  -9 2275.63 314.171   1
  -3  -6   9 2322.83 375.315   1
  -3  -6   8 1337.36 283.474   1
   3   6  -8 1305.90 234.333   1
   3   6  -7 21807.7 921.387   1
  -3  -6   7 20724.8 1081.00   1
  -3  -6   6 4669.04 531.522   1
   3   6  -6 4290.13 396.360   1
  -3  -6   5 589.002 217.020   1
   3   6  -5 761.111 180.636   1
   3   6  -4 9101.52 546.108   1
  -3  -6   4 10593.8 772.478   1
   3   6  -3 3581.89 365.510   1
  -3  -6   3 3007.43 487.989   1
   3   6  -2 10263.5 619.199   1
  -3  -7  12 133.272 159.243   1
  -3  -7  11 10.9010 123.424   1
  -3  -7  10 815.518 269.993   1
   3   7 -10 1137.63 250.862   1
  -3  -7   9 247.261 179.848   1
   3   7  -9 675.203 192.401   1
   3   7  -8 2355.01 337.219   1
  -3  -7   8 2576.31 456.587   1
  -3  -7   7 2830.03 475.486   1
   3   7  -7 2583.05 341.726   1
   3   7  -6 191.310 115.632   1
  -3  -7   6 97.6779 159.876   1
  -3  -7   5 595.307 238.466   1
   3   7  -5 208.284 121.400   1
   3   7  -4 530.564 159.507   1
  -3  -7   4 429.444 226.763   1
   3   7  -3 418.283 152.277   1
   3   7  -2 3275.80 388.279   1
   3   8 -11 62.6289 114.980   1
  -3  -8  11-84.0802 180.751   1
  -3  -8  10 3333.22 583.801   1
   3   8 -10 3376.09 440.863   1
  -3  -8   9 2102.86 469.100   1
   3   8  -9 2106.65 350.358   1
   3   8  -8 825.080 229.392   1
  -3  -8   8 706.979 295.515   1
  -3  -8   7 5198.13 724.565   1
   3   8  -7 5656.00 542.553   1
  -3  -8   6 3455.52 564.549   1
   3   8  -6 1564.81 296.709   1
  -3  -8   5 4368.33 643.067   1
   3   8  -5 4224.52 479.318   1
   3   8  -4 4662.03 480.621   1
  -3  -8   4 4450.97 721.081   1
   3   8  -3 462.730 174.478   1
   3   8  -2 6245.64 580.718   1
  -3  -9  10 656.888 333.480   1
  -3  -9   9 289.107 268.769   1
   3   9  -9 317.700 172.539   1
   3   9  -8 793.950 236.953   1
  -3  -9   8 323.411 267.391   1
  -3  -9   7 157.427 211.784   1
   3   9  -7 261.066 154.948   1
   3   9  -6 181.584 144.287   1
  -3  -9   6 47.3712 199.612   1
  -3  -9   5 889.041 406.290   1
   3   9  -5 936.056 253.263   1
   3   9  -4 3670.33 463.998   1
   3   9  -3 8216.84 711.724   1
  -3 -10   8 157.944 245.241   1
  -3 -10   7 839.182 408.370   1
   3  10  -7 823.587 257.902   1
  -3 -10   6-627.567 404.416   1
   3  10  -6-111.497 143.327   1
   3  10  -5 158.384 146.054   1
   3  10  -4 1364.62 314.605   1
   3  10  -3 40.3487 114.219   1
   3  11  -5 361.996 203.267   1
   3  11  -4 532.991 226.716   1
  -4  10  -1 848.820 279.176   1
   4 -10   1 886.515 474.359   1
   4  -9   0-207.326 295.173   1
  -4   9   0 154.885 146.368   1
  -4   9  -1-34.9956 106.327   1
   4  -9   1-158.179 233.551   1
  -4   9  -2 1670.31 353.974   1
   4  -9   2 1375.06 442.884   1
   4  -9   3 1425.80 475.572   1
  -4   9  -3 1473.53 361.035   1
   4  -9   4 4520.75 771.760   1
  -4   8   1 75.8539 115.597   1
  -4   8   0 4394.86 543.402   1
   4  -8   0 4486.10 757.416   1
   4  -8   1 1120.47 365.110   1
  -4   8  -1 1120.90 274.830   1
   4  -8   2 3139.49 614.185   1
  -4   8  -2 3098.86 442.474   1
   4  -8   3 17678.5 1364.65   1
  -4   8  -3 1904.32 382.952   1
  -4   8  -4 1080.03 300.040   1
   4  -8   4 1286.53 395.493   1
   4  -8   5 1037.60 350.865   1
  -4   8  -5 1013.97 287.775   1
   4  -8   6 5930.04 772.444   1
  -4   7   1 19750.5 1075.60   1
   4  -7  -1 20268.9 1530.01   1
   4  -7   0-116.061 160.724   1
  -4   7   0-39.6947 91.2274   1
   4  -7   1 8860.93 921.067   1
  -4   7  -1 10076.9 734.288   1
  -4   7  -2 1514.57 295.708   1
   4  -7   2 2041.03 437.923   1
  -4   7  -3 432793. 5218.99   1
   4  -7   3 384432. 5782.72   1
  -4   7  -4 696.571 227.176   1
   4  -7   4 599.576 245.586   1
  -4   7  -5 98.9399 117.993   1
   4  -7   5 70.6814 132.124   1
  -4   7  -6 908.491 258.460   1
   4  -7   6 1068.59 324.086   1
   4  -7   7 945.445 326.615   1
  -4   7  -7 883.811 276.835   1
  -4   6   2 8921.77 679.999   1
  -4   6   1 7238.45 604.687   1
   4  -6  -1 7776.27 848.379   1
   4  -6   0 12986.8 989.334   1
  -4   6   0 11490.2 751.311   1
   4  -6   1-79.1049 125.795   1
  -4   6  -1 39.4102 75.9789   1
  -4   6  -2 10660.4 724.028   1
   4  -6   2 10935.8 881.562   1
  -4   6  -3 6496.12 603.161   1
   4  -6   3 6434.22 642.079   1
   4  -6   4 2793.94 437.381   1
  -4   6  -4 3020.04 407.650   1
   4  -6   5 420.659 204.037   1
  -4   6  -5 591.368 195.669   1
  -4   6  -6 218.874 138.997   1
   4  -6   6 55.7247 115.698   1
   4  -6   7 676.333 248.267   1
  -4   6  -7 304.660 160.985   1
   4  -6   8 209.192 162.760   1
  -4   6  -8 439.769 187.909   1
   4  -6   9 3719.17 551.094   1
  -4   5   2 1330.23 248.676   1
   4  -5  -1 4880.87 560.083   1
  -4   5   1 4387.57 436.272   1
   4  -5   0 124.897 126.500   1
  -4   5   0 49.6792 71.2240   1
  -4   5  -1 14009.5 740.744   1
   4  -5   1 14640.6 923.668   1
  -4   5  -2 1494.23 265.576   1
   4  -5   2 1589.85 290.940   1
  -4   5  -3 1235.24 246.055   1
   4  -5   3 1256.04 276.532   1
  -4   5  -4 21.4036 70.9118   1
   4  -5   4 8.86656 79.5219   1
   4  -5   5 4381.44 502.692   1
  -4   5  -5 4212.59 452.316   1
   4  -5   6 19494.5 1054.23   1
  -4   5  -6 21516.8 1064.41   1
   4  -5   7 6055.95 616.548   1
  -4   5  -7 6326.28 583.328   1
   4  -5   8 3283.19 467.067   1
  -4   5  -8 3600.82 457.297   1
  -4   5  -9 562.754 203.950   1
   4  -5   9 484.009 202.192   1
   4  -5  10 173.794 150.485   1
  -4   4   2 9885.57 596.804   1
   4  -4  -1 14190.8 824.462   1
  -4   4   1 12441.3 671.662   1
  -4   4   0 103.195 72.2384   1
   4  -4   0 90.0530 94.2368   1
  -4   4  -1 5980.96 441.818   1
   4  -4   1 6040.77 496.771   1
   4  -4   2 33652.1 1238.26   1
  -4   4  -2 34958.8 1153.43   1
   4  -4   3 1258.72 241.580   1
  -4   4  -3 1367.14 231.161   1
   4  -4   4 2057.85 301.886   1
  -4   4  -4 2152.38 293.427   1
   4  -4   5 88.2905 88.2411   1
  -4   4  -5 124.582 96.3257   1
  -4   4  -6 45.0445 76.2475   1
   4  -4   6 289.878 135.779   1
   4  -4   7 138.320 115.805   1
  -4   4  -7 30.0199 75.7558   1
  -4   4  -8 1692.58 300.653   1
   4  -4   8 1641.76 332.533   1
   4  -4   9 657.724 233.125   1
   4  -4  10 120.815 139.596   1
   4  -4  11 1050.51 308.349   1
  -4   3   2 390.660 110.276   1
  -4   3   1 15662.2 653.686   1
   4  -3  -1 17071.3 833.392   1
   4  -3   0 546.287 141.571   1
  -4   3   0 483.925 115.680   1
   4  -3   1 77504.5 1637.76   1
  -4   3  -1 68773.9 1434.56   1
   4  -3   2 250.140 99.2927   1
  -4   3  -2 272.392 97.3622   1
   4  -3   3 12311.1 638.658   1
  -4   3  -3 12412.8 618.198   1
   4  -3   4 45.0535 63.8487   1
  -4   3  -4-3.85190 48.4533   1
  -4   3  -5 19780.2 835.392   1
   4  -3   5 15983.8 842.066   1
  -4   3  -6 2392.15 309.347   1
   4  -3   6 1914.31 306.019   1
  -4   3  -7 238.906 115.621   1
   4  -3   7 370.214 149.720   1
   4  -3   8 3343.23 421.352   1
   4  -3   9 3041.64 416.889   1
   4  -3  10 12112.8 855.392   1
   4  -3  11-126.956 125.420   1
  -4   2   2 624.772 111.058   1
   4  -2  -1 82.1714 62.3826   1
  -4   2   1 75.2068 45.0547   1
   4  -2   0 8126.67 443.050   1
  -4   2   0 7884.55 406.392   1
   4  -2   1 48191.5 1039.85   1
  -4   2  -1 46374.3 992.754   1
  -4   2  -2 125464. 1702.21   1
   4  -2   2 126160. 1784.72   1
  -4   2  -3 100006. 1610.87   1
   4  -2   3 103610. 1765.22   1
   4  -2   4 2705.31 293.367   1
  -4   2  -4 2748.79 276.777   1
   4  -2   5 364.170 119.695   1
  -4   2  -5 424.365 121.614   1
   4  -2   6 2194.97 289.067   1
   4  -2   7 21143.3 925.482   1
   4  -2   8 2461.66 333.748   1
   4  -2   9 1983.54 315.652   1
  -4   1   3 1603.17 156.070   1
  -4   1   2 399.036 73.5995   1
  -4   1   1 42388.7 732.284   1
   4  -1  -1 41893.4 813.468   1
  -4   1   0 7303.00 313.159   1
   4  -1   0 7090.80 321.613   1
  -4   1  -1 22094.7 588.079   1
   4  -1   1 20334.8 621.437   1
  -4   1  -2 4631.56 286.565   1
   4  -1   2 4736.58 306.272   1
  -4   1  -3 116173. 1541.97   1
   4  -1   3 116678. 1603.84   1
   4  -1   4 8674.34 482.094   1
   4  -1   5 3202.52 306.675   1
   4  -1   6 722.179 158.965   1
   4  -1   7 5.95912 48.2532   1
   4   0  -1 84.1789 29.9945   1
  -4   0   1 92.1887 25.6978   1
   4   0   0 135.035 39.5716   1
   4   0   1 40541.7 712.493   1
   4   0   2 34359.7 710.041   1
   4   0   3 104.504 49.6104   1
  -4  -1  10 6672.82 402.207   1
  -4  -1   9 480.491 108.351   1
  -4  -1   8 289.410 80.0797   1
  -4  -1   7 9014.44 367.321   1
  -4  -1   6 50017.7 786.426   1
  -4  -1   5 1148.03 101.864   1
  -4  -2  13 4241.34 406.932   1
  -4  -2  12-15.7008 66.2417   1
  -4  -2  11 140.246 87.0376   1
  -4  -2  10 5062.24 380.737   1
  -4  -2   9 177.418 81.6512   1
  -4  -2   8 2070.90 220.820   1
  -4  -2   7 4852.72 318.946   1
  -4  -2   6 90258.5 1206.36   1
  -4  -2   5 46.5505 37.5073   1
  -4  -2   4 537.771 83.4316   1
   4   2  -3 66.2811 24.6178   1
  -4  -3  14 1324.65 270.980   1
  -4  -3  13 596.075 185.743   1
  -4  -3  12 4299.25 435.871   1
  -4  -3  11 4.76286 72.0022   1
  -4  -3  10 147.348 94.0664   1
  -4  -3   9 140.745 83.6598   1
  -4  -3   8 1324.56 193.200   1
  -4  -3   7 1144.45 170.270   1
  -4  -3   6 37414.1 937.271   1
  -4  -3   5 88.4107 58.4561   1
   4   3  -5 3.87892 29.7130   1
  -4  -3   4 7916.20 437.265   1
   4   3  -4 8647.35 332.634   1
   4   3  -3 930.046 109.979   1
   4   3  -2 570.233 92.8223   1
  -4  -4  13 135.057 117.291   1
  -4  -4  12 211.539 127.152   1
  -4  -4  11 1938.05 291.346   1
  -4  -4  10 717.574 179.192   1
  -4  -4   9 5046.17 435.742   1
  -4  -4   8 64.8758 80.3807   1
  -4  -4   7 268.630 116.660   1
   4   4  -7 340.841 98.8173   1
  -4  -4   6 7014.72 465.373   1
   4   4  -6 7076.18 384.413   1
  -4  -4   5 1931.28 262.027   1
   4   4  -5 2234.88 212.311   1
   4   4  -4 26969.1 741.512   1
  -4  -4   4 29531.9 974.180   1
   4   4  -3 234.403 73.4000   1
   4   4  -2 1800.45 203.196   1
  -4  -5  12 18.9824 103.199   1
  -4  -5  11 3241.50 424.392   1
  -4  -5  10 282.873 156.021   1
  -4  -5   9 1793.56 305.236   1
  -4  -5   8 353.870 145.408   1
   4   5  -8 123.280 84.7947   1
   4   5  -7 2826.99 283.596   1
  -4  -5   7 1120.80 233.314   1
  -4  -5   6 1632.60 284.029   1
   4   5  -6 1187.36 187.125   1
  -4  -5   5 16334.0 890.576   1
   4   5  -5 18394.4 690.566   1
  -4  -5   4 21403.7 1042.46   1
   4   5  -4 21317.6 737.113   1
   4   5  -3 513.711 125.993   1
   4   5  -2 318.698 109.560   1
  -4  -6  12-166.462 154.395   1
  -4  -6  11 3655.50 478.525   1
  -4  -6  10 124.133 129.175   1
   4   6  -9 372.490 135.984   1
  -4  -6   9 475.686 192.665   1
  -4  -6   8-12.7726 111.278   1
   4   6  -8-159.681 98.4197   1
  -4  -6   7 122.939 141.456   1
   4   6  -7 472.942 147.927   1
  -4  -6   6 3815.11 499.613   1
   4   6  -6 4209.06 376.063   1
  -4  -6   5 9479.24 722.693   1
   4   6  -5 8868.49 557.329   1
   4   6  -4 1701.61 231.745   1
  -4  -6   4 4044.04 554.646   1
   4   6  -3 10249.2 593.099   1
   4   6  -2 7791.13 541.126   1
  -4  -7  11 74.6683 148.931   1
   4   7 -10 114.342 109.102   1
  -4  -7  10 56.5461 152.697   1
  -4  -7   9 851.222 286.103   1
   4   7  -9 721.900 190.215   1
   4   7  -8 1880.04 290.629   1
  -4  -7   8 1823.59 386.891   1
   4   7  -7-50.8156 83.3305   1
  -4  -7   7 130.583 172.691   1
  -4  -7   6 3116.14 475.416   1
   4   7  -6 3022.66 352.336   1
  -4  -7   5 547.564 259.622   1
   4   7  -5 588.212 172.642   1
   4   7  -4 4431.28 415.535   1
   4   7  -3 15998.4 828.217   1
   4   7  -2 11465.1 710.005   1
  -4  -8  10 2036.77 462.632   1
   4   8 -10 2354.88 360.497   1
  -4  -8   9 1571.76 425.558   1
   4   8  -9 2066.98 329.439   1
  -4  -8   8 4876.24 688.246   1
   4   8  -8 5721.08 552.929   1
  -4  -8   7-25.4135 154.748   1
   4   8  -7 115.560 108.677   1
  -4  -8   6 11815.3 1078.27   1
   4   8  -6 11998.4 760.259   1
   4   8  -5 481.753 173.578   1
   4   8  -4 3124.95 384.490   1
   4   8  -3 3135.32 399.522   1
  -4  -9  10 2478.08 566.621   1
   4   9 -10 1615.48 318.683   1
   4   9  -9-115.027 126.662   1
  -4  -9   9 107.586 210.298   1
   4   9  -8-41.2359 106.451   1
  -4  -9   8 745.957 325.700   1
   4   9  -7 4078.61 479.625   1
  -4  -9   7 4031.33 720.539   1
   4   9  -6-26.9138 103.611   1
  -4  -9   6 196.418 276.112   1
   4   9  -5 1238.58 279.291   1
   4   9  -4 5414.44 542.578   1
   4   9  -3 147.149 129.257   1
  -4 -10   9 1296.50 470.972   1
   4  10  -8-188.603 149.427   1
  -4 -10   8-70.5217 275.154   1
  -4 -10   7 2536.40 672.436   1
   4  10  -7 2811.12 433.583   1
   4  10  -6 231.572 166.218   1
   4  10  -5 25.5928 109.134   1
   4  10  -4 936.136 259.345   1
   4  10  -3-215.911 156.143   1
   4  11  -6-35.2240 139.362   1
   4  11  -5 3886.33 542.644   1
   4  11  -4 1863.85 381.060   1
  -5  10   0 3381.22 532.576   1
  -5   9   1 1602.15 357.584   1
  -5   9   0 7891.50 757.311   1
   5  -9   0 7550.73 1124.28   1
  -5   9  -1 126.753 136.348   1
   5  -9   1 576.076 323.672   1
   5  -9   2 805.928 373.491   1
  -5   9  -2 373.386 198.609   1
   5  -9   3 1252.08 457.839   1
   5  -8  -1 319.127 298.833   1
  -5   8   1 20.4716 99.8486   1
  -5   8   0 122.740 123.194   1
   5  -8   0 92.7461 199.625   1
  -5   8  -1 267.348 155.936   1
   5  -8   1 278.720 235.862   1
  -5   8  -2 5884.86 638.083   1
   5  -8   2 5449.45 807.595   1
   5  -8   3 1268.94 403.360   1
  -5   8  -3 1472.81 349.749   1
  -5   8  -4 158.335 147.205   1
   5  -8   4 144.409 199.690   1
   5  -8   5 816.479 323.587   1
  -5   8  -5 3045.86 484.814   1
  -5   7   2 29.4042 87.9189   1
   5  -7  -1 16805.9 1405.48   1
  -5   7   1 19.3809 96.0915   1
  -5   7   0 2458.19 373.545   1
   5  -7   0 2948.86 525.525   1
  -5   7  -1 3880.65 465.831   1
   5  -7   1 3686.53 616.771   1
  -5   7  -2 1348.30 302.205   1
   5  -7   2 1697.78 413.041   1
   5  -7   3 3613.08 573.971   1
  -5   7  -3 3688.35 500.806   1
   5  -7   4 968.029 305.834   1
  -5   7  -4 1483.78 319.765   1
  -5   7  -5 18289.0 1100.81   1
   5  -7   5 17796.2 1218.92   1
  -5   7  -6 4119.53 543.348   1
   5  -7   6 3076.99 549.003   1
   5  -7   7 1238.88 370.890   1
  -5   6   2 262.487 132.341   1
  -5   6   1 1854.86 307.934   1
   5  -6  -1 2284.67 458.130   1
  -5   6   0 5773.93 520.435   1
   5  -6   0 5364.76 669.660   1
  -5   6  -1 66735.8 1765.18   1
   5  -6   1 61912.9 2164.08   1
   5  -6   2 15256.7 1041.95   1
  -5   6  -2 12134.8 820.288   1
  -5   6  -3 34.2815 87.6678   1
   5  -6   3 75.4837 114.740   1
   5  -6   4 5809.83 647.860   1
  -5   6  -4 5700.60 568.925   1
   5  -6   5 176.102 161.906   1
  -5   6  -5 121.020 115.141   1
   5  -6   6 826726. 7887.98   1
  -5   6  -6 751793. 7041.59   1
   5  -6   7 78.0372 132.807   1
  -5   6  -7 312.436 169.625   1
   5  -6   8 89.7357 138.000   1
  -5   6  -8-165.373 138.746   1
  -5   5   3 1754.74 287.658   1
  -5   5   2 8955.53 611.499   1
  -5   5   1 1580.42 263.077   1
   5  -5  -1 1951.75 358.413   1
  -5   5   0 865.307 194.092   1
   5  -5   0 620.268 218.828   1
  -5   5  -1 816.350 194.799   1
   5  -5   1 962.490 253.575   1
   5  -5   2 12887.4 831.922   1
  -5   5  -2 12696.8 778.154   1
   5  -5   3 15795.4 983.436   1
  -5   5  -3 17186.8 893.401   1
  -5   5  -4 1588.00 283.723   1
   5  -5   4 1377.50 293.815   1
   5  -5   5 4779.94 539.925   1
  -5   5  -5 4884.35 511.843   1
   5  -5   6 279.622 154.400   1
  -5   5  -6 152.139 119.237   1
   5  -5   7 4712.58 563.648   1
  -5   5  -7 4887.75 526.981   1
   5  -5   8 2757.21 446.139   1
  -5   5  -8 3126.23 444.108   1
   5  -5   9 6010.20 662.907   1
  -5   5  -9 6445.66 648.789   1
  -5   4   3 1812.44 264.723   1
   5  -4  -2 9206.39 805.131   1
  -5   4   2 7741.50 528.509   1
  -5   4   1 1725.03 242.791   1
   5  -4  -1 1547.96 300.567   1
  -5   4   0 1042.74 188.727   1
   5  -4   0 1359.19 269.080   1
   5  -4   1 3165.13 372.339   1
  -5   4  -1 2501.46 317.049   1
   5  -4   2-106.138 99.9410   1
  -5   4  -2 89.1469 78.5250   1
   5  -4   3 39747.0 1360.72   1
  -5   4  -3 41293.2 1277.65   1
   5  -4   4 3942.18 429.984   1
  -5   4  -4 4158.40 425.818   1
   5  -4   5 1193.96 251.305   1
  -5   4  -5 1140.41 234.439   1
  -5   4  -6 889.669 212.762   1
   5  -4   6 1010.84 239.322   1
   5  -4   7 144540. 2912.82   1
  -5   4  -7 139857. 2665.22   1
  -5   4  -8 11365.9 783.565   1
   5  -4   8 10254.2 832.756   1
   5  -4   9 311.359 178.695   1
   5  -4  10 714.046 261.964   1
  -5   3   3 60087.2 1302.16   1
  -5   3   2 24792.0 849.631   1
   5  -3  -2 26779.1 1200.74   1
  -5   3   1 16381.3 642.611   1
   5  -3  -1 16019.0 820.896   1
   5  -3   0 12501.2 660.640   1
  -5   3   0 12959.0 612.629   1
   5  -3   1 5439.91 459.024   1
  -5   3  -1 5958.56 425.006   1
   5  -3   2 2460.03 295.833   1
  -5   3  -2 2657.43 290.758   1
   5  -3   3 1288.02 221.618   1
  -5   3  -3 1294.01 216.099   1
   5  -3   4 2949.13 348.442   1
  -5   3  -4 2773.90 321.743   1
  -5   3  -5 9033.00 583.956   1
   5  -3   5 7869.85 611.343   1
  -5   3  -6 9249.84 622.665   1
   5  -3   6 8533.85 660.789   1
  -5   3  -7 297.300 131.720   1
   5  -3   7 252.742 136.591   1
   5  -3   8 8979.13 715.054   1
   5  -3   9 1277.24 288.552   1
   5  -3  10 6673.26 662.919   1
   5  -3  11 3175.55 480.177   1
  -5   2   3 999999. 4382.32   1
  -5   2   2 4021.33 275.421   1
   5  -2  -2 4360.58 414.727   1
   5  -2  -1 3569.39 325.996   1
  -5   2   1 3296.71 255.492   1
  -5   2   0 1539.89 185.032   1
   5  -2   0 1519.89 209.669   1
  -5   2  -1 438.791 105.648   1
   5  -2   1 3317.09 290.981   1
   5  -2   2 6474.22 423.325   1
  -5   2  -2 6840.45 428.792   1
  -5   2  -3 2628.61 269.832   1
   5  -2   3 2334.78 285.486   1
  -5   2  -4 923.570 173.063   1
   5  -2   4 872.977 181.153   1
   5  -2   5 8855.95 576.358   1
  -5   2  -5 8917.34 544.131   1
   5  -2   6 891.453 197.048   1
   5  -2   7 363.148 139.451   1
   5  -2   8 30867.5 1217.00   1
   5  -2   9 1773.48 311.035   1
  -5   1   4 353.617 82.6463   1
  -5   1   3 13623.2 415.171   1
  -5   1   2 85.3705 39.5290   1
   5  -1  -2 105.105 75.3329   1
  -5   1   1 103144. 1168.68   1
   5  -1  -1 104115. 1332.84   1
   5  -1   0 115.506 52.8814   1
  -5   1   0 41.6327 37.8040   1
  -5   1  -1 24129.8 642.382   1
   5  -1   1 22940.0 703.636   1
   5  -1   2 229.638 79.2947   1
  -5   1  -2 291.451 82.0748   1
   5  -1   3 9524.19 491.527   1
   5  -1   4 5969.60 412.951   1
   5  -1   5 31871.0 1037.02   1
   5  -1   6 1162.99 209.945   1
   5  -1   7 95.9194 79.9626   1
   5   0  -1 438.277 69.9175   1
   5   0   0 187.084 54.2506   1
   5   0   1 785.181 110.456   1
   5   0   2 12302.8 472.111   1
   5   0   3 70.0240 47.4135   1
   5   0   4 424.968 105.327   1
  -5  -1  11 213.554 88.0939   1
  -5  -1  10 170.082 76.1164   1
  -5  -1   9-43.1489 49.3465   1
  -5  -1   8 33711.0 720.674   1
  -5  -1   7 235.557 60.4361   1
  -5  -1   6 7601.34 267.681   1
   5   1   0 29094.6 499.950   1
  -5  -2  13 1372.45 232.754   1
  -5  -2  12 56.3344 77.3697   1
  -5  -2  11 3645.42 334.906   1
  -5  -2  10 6109.29 412.430   1
  -5  -2   9 133.511 76.5278   1
  -5  -2   8 4548.45 308.125   1
  -5  -2   7 17054.6 517.988   1
  -5  -2   6 71.2411 45.2322   1
  -5  -2   5 2224.89 166.839   1
  -5  -3  12 996.353 198.107   1
  -5  -3  11 715.818 161.935   1
  -5  -3  10 57.7144 72.1902   1
  -5  -3   9-150.113 82.7623   1
  -5  -3   8 167.038 83.6850   1
  -5  -3   7 2634.72 261.720   1
  -5  -3   6 2761.16 246.962   1
  -5  -3   5 3437.18 291.325   1
   5   3  -4 7149.79 267.516   1
   5   3  -3 16125.4 402.940   1
   5   3  -2 88.3286 46.4080   1
  -5  -4  11 88.6050 98.4249   1
  -5  -4  10 8658.27 573.759   1
  -5  -4   9 7933.04 554.249   1
  -5  -4   8 599.056 152.502   1
  -5  -4   7 1990.21 260.212   1
   5   4  -6 699.647 118.651   1
  -5  -4   6 551.648 151.785   1
  -5  -4   5 675.950 163.217   1
   5   4  -5 788.560 124.998   1
   5   4  -4 711.921 114.497   1
   5   4  -3 29101.0 678.542   1
   5   4  -2 29.5528 53.0710   1
  -5  -5  11-355.570 167.849   1
  -5  -5  10 758.592 202.275   1
  -5  -5   9 6738.42 550.696   1
  -5  -5   8 2725.93 364.670   1
   5   5  -7 918.950 157.942   1
  -5  -5   7 1146.53 244.049   1
   5   5  -6 3142.68 279.737   1
  -5  -5   6 2922.70 370.821   1
   5   5  -5 5438.14 353.909   1
  -5  -5   5 4736.06 518.874   1
   5   5  -4 996.564 158.401   1
   5   5  -3 257.732 91.9057   1
   5   5  -2 4103.90 355.681   1
  -5  -6  10 35.6412 123.770   1
  -5  -6   9 593.434 220.991   1
  -5  -6   8 2994.29 440.611   1
   5   6  -8 3609.70 342.938   1
  -5  -6   7 240.097 166.690   1
   5   6  -7 109.946 84.2092   1
   5   6  -6 257.560 103.489   1
  -5  -6   6 432.778 199.905   1
   5   6  -5 6576.65 454.287   1
   5   6  -4 1084.77 179.817   1
   5   6  -3 1699.58 245.060   1
   5   6  -2 1208.84 220.318   1
  -5  -7  10 1715.82 380.596   1
  -5  -7   9 1521.75 376.351   1
   5   7  -9 1983.66 289.795   1
  -5  -7   8 9615.79 840.636   1
   5   7  -8 9284.30 595.413   1
   5   7  -7-92.2673 90.9165   1
  -5  -7   7 63.0995 148.052   1
   5   7  -6 19.8775 71.6200   1
  -5  -7   6 206.134 215.563   1
   5   7  -5 172.550 109.707   1
   5   7  -4 1499.87 239.461   1
   5   7  -3 4494.75 439.347   1
   5   7  -2 30876.6 1163.28   1
   5   8 -10 480.066 173.142   1
   5   8  -9 1314.98 254.785   1
  -5  -8   9 1235.54 357.527   1
  -5  -8   8 407.352 253.739   1
   5   8  -8 377.648 155.261   1
   5   8  -7-81.8322 98.3846   1
  -5  -8   7 116.863 226.169   1
   5   8  -6 3802.29 414.242   1
   5   8  -5 266.345 137.161   1
   5   8  -4 3739.43 405.195   1
   5   8  -3 1827.21 314.506   1
   5   9 -10 684.277 212.022   1
   5   9  -9 3318.76 428.581   1
  -5  -9   8-263.492 298.423   1
   5   9  -8 503.853 189.254   1
   5   9  -7 5992.97 558.226   1
   5   9  -6-220.332 141.452   1
   5   9  -5 25.0077 96.8317   1
   5   9  -4-119.591 114.769   1
   5   9  -3 236.251 147.234   1
   5  10  -9 131.383 137.255   1
   5  10  -8 140.219 135.703   1
   5  10  -7 807.230 239.881   1
   5  10  -6 281.490 171.040   1
   5  10  -5 2478.92 396.203   1
   5  10  -4 945.632 253.582   1
   5  11  -7 448.389 205.875   1
   5  11  -6-36.3084 130.119   1
   5  11  -5 4589.87 571.591   1
   5  11  -4 1024.28 284.410   1
  -6   9   1 787.491 258.583   1
  -6   9   0 257.213 169.212   1
   6  -9   0 941.014 453.032   1
  -6   9  -1 4082.00 557.394   1
   6  -9   1 3737.45 714.191   1
   6  -9   2 2602.17 628.779   1
  -6   8   2 2904.45 461.889   1
   6  -8  -1 171.625 274.884   1
  -6   8   1 196.717 143.377   1
  -6   8   0 443.485 190.907   1
   6  -8   0 672.350 327.209   1
   6  -8   1 1553.15 457.646   1
  -6   8  -1 1511.73 329.408   1
   6  -8   2 1965.91 514.446   1
  -6   8  -2 2097.49 414.448   1
  -6   8  -3 2490.70 446.605   1
   6  -8   3 2156.54 522.312   1
  -6   8  -4 3924.17 551.977   1
   6  -8   4 2182.16 529.966   1
  -6   7   2 185.883 138.418   1
  -6   7   1 5931.72 576.674   1
   6  -7  -1 5650.50 822.167   1
  -6   7   0 7144.94 634.392   1
   6  -7   0 7406.48 840.295   1
  -6   7  -1 2803.29 416.166   1
   6  -7   1 2483.82 522.476   1
  -6   7  -2 1363.78 316.149   1
   6  -7   2 1511.55 403.258   1
  -6   7  -3 1515.72 326.671   1
   6  -7   3 1033.28 331.955   1
  -6   7  -4 640.008 224.896   1
   6  -7   4 679.237 271.171   1
  -6   7  -5 2570.14 429.753   1
   6  -7   5 2331.53 468.656   1
   6  -7   6 3592.44 607.465   1
  -6   6   3 2288.68 341.011   1
  -6   6   2 1137.93 250.437   1
  -6   6   1 1227.70 248.583   1
   6  -6  -1 1322.27 350.612   1
  -6   6   0 16175.2 872.709   1
   6  -6   0 14124.7 1111.19   1
  -6   6  -1 562.013 192.057   1
   6  -6   1 347.716 202.914   1
   6  -6   2 2867.93 472.863   1
  -6   6  -2 2592.87 393.098   1
  -6   6  -3 94.4358 107.601   1
   6  -6   3 28.9678 108.787   1
  -6   6  -4 91.5125 109.066   1
   6  -6   4-119.973 141.740   1
  -6   6  -5-31.1466 97.9379   1
   6  -6   5 31.7310 129.234   1
  -6   6  -6 2597.72 419.895   1
   6  -6   6 2043.11 419.267   1
   6  -6   7 8471.10 858.424   1
  -6   6  -7 9098.13 786.372   1
  -6   5   3 32724.1 1165.36   1
  -6   5   2 30.9002 72.3274   1
   6  -5  -2 72.3936 167.065   1
  -6   5   1 3895.88 395.479   1
   6  -5  -1 4615.39 559.608   1
   6  -5   0 40.0067 111.931   1
  -6   5   0-35.9751 72.2992   1
   6  -5   1-63.0850 109.574   1
  -6   5  -1-123.584 103.460   1
   6  -5   2 1079.27 259.935   1
  -6   5  -2 1236.07 249.471   1
   6  -5   3 734.062 237.380   1
  -6   5  -3 291.034 137.894   1
   6  -5   4 8656.58 751.257   1
  -6   5  -4 10636.2 737.686   1
   6  -5   5 856.206 250.748   1
  -6   5  -5 1076.11 256.783   1
   6  -5   6 744.607 237.240   1
  -6   5  -6 878.345 237.611   1
   6  -5   7 244.958 161.647   1
  -6   5  -7 528.110 195.753   1
   6  -5   8 696.830 247.453   1
  -6   5  -8 535.513 207.064   1
  -6   4   4 5472.81 449.852   1
  -6   4   3 473.673 142.470   1
  -6   4   2 11023.4 606.087   1
   6  -4  -2 10336.0 864.634   1
  -6   4   1 3221.26 327.377   1
   6  -4  -1 2995.27 431.373   1
  -6   4   0 224.811 108.993   1
   6  -4   0 230.860 137.404   1
  -6   4  -1 2835.10 336.142   1
   6  -4   1 2826.08 365.699   1
   6  -4   2 762.732 213.518   1
  -6   4  -2 829.058 188.327   1
  -6   4  -3 926.204 203.572   1
   6  -4   3 827.049 216.173   1
   6  -4   4 3295.24 409.004   1
  -6   4  -4 3681.32 415.067   1
   6  -4   5 12251.4 811.688   1
  -6   4  -5 12486.5 769.042   1
  -6   4  -6-23.9514 79.0773   1
   6  -4   6-4.26604 76.7138   1
  -6   4  -7 106.273 108.823   1
   6  -4   7 194.364 140.088   1
   6  -4   8 1065.08 289.163   1
  -6   4  -8 1515.66 304.922   1
   6  -4   9 7166.79 753.753   1
   6  -4  10 2433.73 463.126   1
  -6   3   4 3312.86 307.569   1
  -6   3   3 5960.16 418.513   1
  -6   3   2 9812.18 496.078   1
   6  -3  -2 6392.13 573.155   1
   6  -3  -1 18.1378 76.4792   1
  -6   3   1-34.3280 54.1211   1
  -6   3   0 1277.38 202.791   1
   6  -3   0 1188.11 216.634   1
   6  -3   1 43069.2 1339.90   1
  -6   3  -1 48524.1 1220.24   1
   6  -3   2 4559.59 421.138   1
  -6   3  -2 4721.81 397.138   1
   6  -3   3 6519.61 512.068   1
  -6   3  -3 6541.75 485.068   1
   6  -3   4 11511.9 701.080   1
  -6   3  -4 11527.8 657.479   1
  -6   3  -5 3310.02 372.714   1
   6  -3   5 2947.67 391.269   1
  -6   3  -6 3467.04 395.568   1
   6  -3   6 2978.08 414.772   1
   6  -3   7 425.750 178.107   1
   6  -3   8 894.077 249.387   1
   6  -3   9 58.1586 106.708   1
   6  -3  10 282.436 168.533   1
  -6   2   4 1545.59 174.580   1
  -6   2   3 12129.1 473.591   1
   6  -2  -2 65084.9 1492.61   1
  -6   2   2 61612.4 1087.75   1
   6  -2  -1 14770.9 689.899   1
  -6   2   1 13641.5 544.807   1
  -6   2   0 32184.5 851.173   1
   6  -2   0 30689.8 975.675   1
   6  -2   1 8071.19 479.913   1
  -6   2  -1 8642.62 479.253   1
  -6   2  -2 142.681 74.7888   1
   6  -2   2 133.657 77.3638   1
  -6   2  -3 10341.7 551.607   1
   6  -2   3 9456.70 592.769   1
  -6   2  -4 13416.2 661.851   1
   6  -2   4 12128.0 697.665   1
   6  -2   5 2288.43 311.621   1
   6  -2   6 532.117 164.955   1
   6  -2   7 1474.20 273.817   1
   6  -2   8 203.394 124.691   1
   6  -2   9 4881.27 529.580   1
  -6   1   5 1947.55 178.205   1
  -6   1   4 8885.33 325.870   1
  -6   1   3 66.3374 38.7161   1
  -6   1   2 10764.7 369.926   1
   6  -1  -2 11717.5 521.724   1
  -6   1   1 483.793 91.4078   1
   6  -1   0 8112.86 403.331   1
  -6   1   0 7779.08 359.586   1
  -6   1  -1 28632.2 747.233   1
   6  -1   1 29055.5 827.823   1
  -6   1  -2 1449.22 181.318   1
   6  -1   2 1474.69 202.602   1
   6  -1   3 5606.47 401.868   1
   6  -1   4 850.321 169.011   1
   6  -1   5 27368.6 978.748   1
   6  -1   6 6916.31 530.275   1
   6  -1   7 2851.18 365.257   1
   6   0  -2 921.727 117.949   1
   6   0  -1 11571.2 391.097   1
   6   0   0 48766.8 901.044   1
   6   0   1 1693.40 175.890   1
   6   0   2 13359.0 535.035   1
   6   0   3 6333.85 392.376   1
   6   0   4 7294.42 443.051   1
  -6  -1  12 3964.56 317.115   1
  -6  -1  11 4425.91 314.115   1
  -6  -1  10 597.627 114.311   1
  -6  -1   9 2638.81 207.496   1
  -6  -1   8 301.709 68.9603   1
  -6  -1   7 9298.48 311.888   1
   6   1  -1 2312.08 138.074   1
   6   1   0 183.548 50.6831   1
   6   1   1 178191. 1583.79   1
  -6  -2  11 717.598 150.872   1
  -6  -2  10 297.720 96.0687   1
  -6  -2   9 1738.48 184.644   1
  -6  -2   8 305.498 79.1795   1
  -6  -2   7 661.336 104.863   1
  -6  -2   6 905.156 111.115   1
  -6  -3  10 2096.39 251.182   1
  -6  -3   9 918903. 5066.66   1
  -6  -3   8 187.176 83.2843   1
  -6  -3   7 6525.93 390.636   1
  -6  -3   6 335.228 96.9740   1
   6   3  -4 4716.02 170.749   1
   6   3  -3 102.579 30.4422   1
   6   3  -2 2839.91 189.496   1
  -6  -4  10 1594.85 243.936   1
  -6  -4   9 1508.34 235.470   1
  -6  -4   8 5798.20 451.393   1
  -6  -4   7 1779.39 261.039   1
  -6  -4   6 1929.13 290.073   1
   6   4  -5 1624.13 148.179   1
   6   4  -4 404.990 77.8548   1
   6   4  -3 3669.92 221.169   1
   6   4  -2 3524.17 275.728   1
  -6  -5   9 428.042 175.254   1
  -6  -5   8 221.256 147.916   1
  -6  -5   7 549.555 180.405   1
   6   5  -7 530.410 115.922   1
   6   5  -6 490.007 108.381   1
   6   5  -5 3303.85 254.508   1
   6   5  -4-35.7754 53.4407   1
   6   5  -3 43106.0 965.144   1
   6   5  -2 2156.13 256.838   1
  -6  -6   9 2260.01 391.279   1
   6   6  -8 3969.94 337.856   1
  -6  -6   8 3768.76 463.027   1
   6   6  -7 3422.79 304.596   1
  -6  -6   7 2803.07 462.527   1
   6   6  -6 1718.00 218.160   1
   6   6  -5 6134.87 404.544   1
   6   6  -4 12181.2 550.734   1
   6   6  -3 13375.1 645.968   1
   6   6  -2 15245.5 753.446   1
   6   7  -9 117.518 96.3083   1
  -6  -7   8 1159.42 353.913   1
   6   7  -8 1789.50 251.609   1
   6   7  -7 2334.19 292.665   1
   6   7  -6 2993.28 317.306   1
   6   7  -5 2979.72 331.120   1
   6   7  -4 1269.85 211.315   1
   6   7  -3 2928.15 347.341   1
   6   8  -9 136.269 110.712   1
   6   8  -8 136.620 109.895   1
   6   8  -7 1139.72 224.978   1
   6   8  -6-71.9949 91.9949   1
   6   8  -5 989.339 220.223   1
   6   8  -4 1516.01 256.218   1
   6   8  -3 2076.07 326.610   1
   6   9  -8 1350.90 275.027   1
   6   9  -7 50.4030 99.8225   1
   6   9  -6 2068.91 326.999   1
   6   9  -5 39.5207 100.997   1
   6   9  -4 2354.07 343.054   1
   6   9  -3 1350.33 288.059   1
   6  10  -7-29.9079 104.610   1
   6  10  -6 28.3649 109.326   1
   6  10  -5 622.016 213.360   1
   6  10  -4 42.7617 106.744   1
   6  11  -6 186.576 159.841   1
   6  11  -5 130.401 143.991   1
  -7   9   2 69.2081 122.808   1
  -7   9   1 612.845 235.123   1
   7  -9   0 367.730 345.516   1
  -7   9   0 439.087 204.713   1
   7  -9   1 4138.75 753.230   1
  -7   8   2 35.4292 103.606   1
  -7   8   1 8784.10 757.061   1
   7  -8  -1 6854.98 1042.60   1
   7  -8   0 611.695 324.199   1
  -7   8   0 407.656 186.871   1
  -7   8  -1 1586.94 360.943   1
   7  -8   1 1431.73 457.298   1
   7  -8   2-72.3810 202.725   1
  -7   8  -2 114.361 143.773   1
   7  -8   3 2575.16 583.234   1
  -7   7   3 3497.26 464.940   1
  -7   7   2 129.308 116.660   1
  -7   7   1 2339.44 369.692   1
   7  -7  -1 2459.07 559.117   1
  -7   7   0 1507.22 308.714   1
   7  -7   0 1022.40 352.473   1
   7  -7   1 613.581 301.804   1
  -7   7  -1 269.606 168.014   1
   7  -7   2 4153.40 663.235   1
  -7   7  -2 4038.54 525.017   1
  -7   7  -3 108.193 127.725   1
   7  -7   3 75.6020 162.654   1
  -7   7  -4 212.508 155.076   1
   7  -7   4-30.5730 142.678   1
   7  -7   5 1268.37 366.581   1
  -7   6   4 124.152 109.103   1
  -7   6   3 5072.12 509.394   1
  -7   6   2 7303.71 585.123   1
  -7   6   1 518.476 171.638   1
   7  -6  -1 582.688 259.331   1
   7  -6   0 943.157 325.458   1
  -7   6   0 633.802 200.091   1
  -7   6  -1 182.286 132.515   1
   7  -6   1 227.507 187.790   1
   7  -6   2 2771.41 480.147   1
  -7   6  -2 2963.00 414.275   1
  -7   6  -3 489.911 187.971   1
   7  -6   3 327.807 189.460   1
  -7   6  -4 6579.21 635.973   1
   7  -6   4 6499.42 724.797   1
   7  -6   5 1619.50 401.051   1
  -7   6  -5 4049.35 533.079   1
   7  -6   6 8614.80 880.736   1
  -7   6  -6 8487.23 770.372   1
  -7   5   4 4592.26 445.396   1
  -7   5   3 2518.12 329.450   1
  -7   5   2 15219.9 772.519   1
   7  -5  -2 14556.0 1170.82   1
   7  -5  -1 336.434 192.779   1
  -7   5   1 116.063 93.3998   1
   7  -5   0 28826.1 1418.99   1
  -7   5   0 26391.0 1130.51   1
  -7   5  -1 820.227 208.290   1
   7  -5   1 686.330 233.369   1
  -7   5  -2 2383.53 345.624   1
   7  -5   2 2411.33 392.424   1
   7  -5   3 9941.50 833.103   1
  -7   5  -3 10446.9 725.317   1
   7  -5   4 493.906 211.522   1
  -7   5  -4 529.544 192.223   1
   7  -5   5 3840.26 527.566   1
  -7   5  -5 3653.90 466.042   1
   7  -5   6 43.5829 112.953   1
  -7   5  -6 316.341 160.438   1
   7  -5   7 2084.09 404.374   1
  -7   5  -7 2406.69 402.836   1
   7  -5   8 1305.46 336.308   1
  -7   4   5 1211.63 214.740   1
  -7   4   4 1570.96 247.824   1
  -7   4   3 28140.6 955.564   1
  -7   4   2 594.650 148.269   1
   7  -4  -2 593.335 237.809   1
   7  -4  -1 887.346 259.471   1
  -7   4   1 477.230 146.968   1
   7  -4   0 10793.2 784.690   1
  -7   4   0 10347.4 637.672   1
  -7   4  -1 2565.03 321.947   1
   7  -4   1 2554.54 362.567   1
  -7   4  -2 388.704 139.593   1
   7  -4   2 270.403 149.620   1
   7  -4   3 3666.62 454.052   1
  -7   4  -3 4360.05 455.869   1
   7  -4   4-199.728 129.243   1
  -7   4  -4 26.3765 77.4052   1
   7  -4   5 6201.43 604.827   1
  -7   4  -5 6587.60 568.696   1
   7  -4   6 170.737 130.989   1
  -7   4  -6 45.3608 92.6660   1
  -7   4  -7 990.270 250.198   1
   7  -4   7 712.104 232.332   1
   7  -4   8 981.267 284.502   1
   7  -4   9 722.733 264.823   1
  -7   3   5 25.1093 57.0314   1
  -7   3   4 8456.12 475.704   1
  -7   3   3 4567.04 340.138   1
   7  -3  -2 838.325 225.464   1
  -7   3   2 730.430 150.086   1
   7  -3  -1 13939.6 805.644   1
  -7   3   1 14159.3 653.589   1
  -7   3   0 1937.06 247.360   1
   7  -3   0 1633.64 263.261   1
   7  -3   1 1290.13 250.506   1
  -7   3  -1 1454.57 221.878   1
   7  -3   2 309.669 130.594   1
  -7   3  -2 336.076 123.246   1
   7  -3   3 2305.81 321.846   1
  -7   3  -3 2215.31 292.660   1
  -7   3  -4 275.191 120.433   1
   7  -3   4 294.536 132.039   1
  -7   3  -5 23.1872 72.2629   1
   7  -3   5 97.1355 101.434   1
  -7   3  -6 342.869 144.136   1
   7  -3   6 21.2838 89.2686   1
   7  -3   7 9414.61 782.232   1
   7  -3   8 633.891 228.303   1
   7  -3   9 718.197 248.962   1
   7  -3  10 4732.35 611.252   1
  -7   2   6 17465.1 634.878   1
  -7   2   5 94.0874 60.4227   1
  -7   2   4 13870.2 487.711   1
  -7   2   3 26118.8 714.259   1
  -7   2   2 565.516 114.663   1
   7  -2  -2 571.946 159.489   1
   7  -2  -1 23638.2 917.712   1
  -7   2   1 22551.0 701.567   1
  -7   2   0 1412.77 194.622   1
   7  -2   0 5792.63 448.199   1
   7  -2   1 3090.32 317.773   1
  -7   2  -1 2991.91 286.639   1
   7  -2   2 76.7898 71.8216   1
  -7   2  -2 7.73471 47.9960   1
  -7   2  -3 3475.91 337.245   1
   7  -2   3 3241.67 360.867   1
  -7   2  -4 27209.6 970.547   1
   7  -2   4 26437.6 1082.15   1
   7  -2   5 2718.65 359.591   1
   7  -2   6 306.168 139.553   1
   7  -2   7 30855.4 1272.37   1
   7  -2   8 2399.44 377.136   1
   7  -2   9 965.908 257.193   1
  -7   1   6 5365.89 259.935   1
  -7   1   5 722.932 85.7084   1
  -7   1   4 4168.68 216.281   1
  -7   1   3 712.924 94.4419   1
   7  -1  -2 515.394 132.679   1
  -7   1   2 437.327 83.0717   1
  -7   1   1 2405.44 195.357   1
   7  -1  -1 2566.03 243.987   1
   7  -1   0 2308.56 236.380   1
  -7   1   0 2405.15 213.770   1
   7  -1   1 1222.87 179.103   1
  -7   1  -1 1317.12 169.841   1
   7  -1   2 1540.07 224.282   1
   7  -1   3 5823.54 434.303   1
   7  -1   4 523.975 144.529   1
   7  -1   5 3342.83 361.394   1
   7  -1   6 6274.87 516.386   1
   7  -1   7 21513.3 1010.82   1
  -7   0   9 35.0688 32.7135   1
  -7   0   8 871.570 85.3211   1
   7   0  -2 26644.6 704.921   1
   7   0  -1 1821.55 173.414   1
   7   0   0 16048.4 541.074   1
   7   0   1 43.9941 47.2500   1
   7   0   2 3415.84 285.567   1
   7   0   3 4438.25 354.922   1
   7   0   4 8875.31 521.277   1
   7   0   5 139.908 84.8718   1
  -7  -1  10 2569.85 213.010   1
  -7  -1   9 16.1916 33.8522   1
  -7  -1   8 123.892 37.5585   1
   7   1  -1 16202.8 420.089   1
   7   1   0 5294.55 267.424   1
   7   1   1 6157.64 325.070   1
   7   1   2 60.4279 47.6684   1
  -7  -2   9 21791.1 620.052   1
  -7  -2   8 421.847 83.5711   1
   7   2  -1 1353.67 100.898   1
  -7  -3   9 491.584 125.463   1
  -7  -3   8 115.414 77.7828   1
  -7  -4   8 1401.42 232.326   1
   7   4  -4 11526.7 325.784   1
   7   4  -3 717.084 88.5568   1
   7   4  -2 1138.37 152.090   1
   7   5  -6 310.047 81.7578   1
   7   5  -5 228.803 73.1975   1
   7   5  -4 101.821 58.5808   1
   7   5  -3 2.83056 44.5186   1
   7   5  -2 428.812 123.618   1
   7   6  -7 2664.11 253.090   1
   7   6  -6 2863.21 258.302   1
   7   6  -5 267655. 2431.32   1
   7   6  -4 3560.11 289.238   1
   7   6  -3 4565.46 353.118   1
   7   7  -8 550.887 143.772   1
   7   7  -7 2327.68 268.664   1
   7   7  -6 9309.73 515.382   1
   7   7  -5 109.281 87.2080   1
   7   7  -4 969.381 175.868   1
   7   7  -3 729.099 178.237   1
   7   8  -7 319.277 133.014   1
   7   8  -6 92.7457 91.9283   1
   7   8  -5 1223.45 234.547   1
   7   8  -4 82.9362 90.1593   1
   7   8  -3 4821.22 468.739   1
   7   9  -6 932.036 216.769   1
   7   9  -5 7386.96 595.283   1
   7   9  -4 1864.44 299.447   1
   7  10  -6 5925.79 558.981   1
   7  10  -5-25.6790 109.154   1
   7  10  -4 2664.20 385.124   1
   7  11  -5 146.500 146.295   1
  -8   9   2 9359.22 827.246   1
  -8   9   1 286.958 175.730   1
  -8   8   3 291.587 163.012   1
  -8   8   2 5807.28 612.866   1
   8  -8  -1 631.105 402.881   1
  -8   8   1 1224.27 295.032   1
   8  -8   0 1979.47 525.392   1
  -8   8   0 1676.03 368.454   1
  -8   8  -1 687.882 255.684   1
   8  -8   1 694.939 356.309   1
   8  -8   2 2154.88 561.115   1
  -8   7   4 524.541 191.386   1
  -8   7   3 1541.04 298.061   1
  -8   7   2 132.348 120.005   1
   8  -7  -1 395.814 293.044   1
  -8   7   1 123.470 121.602   1
  -8   7   0 4.67552 101.901   1
   8  -7   0-213.366 223.559   1
   8  -7   1 53.3272 190.112   1
  -8   7  -1 699.857 235.945   1
  -8   7  -2 2129.87 385.912   1
   8  -7   2 2207.31 509.542   1
   8  -7   3 4512.86 703.295   1
  -8   7  -3 4468.84 559.581   1
   8  -7   4 1725.25 435.596   1
  -8   6   4 311.540 145.134   1
  -8   6   3 2435.72 339.994   1
  -8   6   2 12314.2 752.066   1
   8  -6  -2 9608.77 1071.87   1
   8  -6  -1 698.819 286.443   1
  -8   6   1 513.673 184.944   1
   8  -6   0 10508.4 1016.20   1
  -8   6   0 12721.8 851.863   1
  -8   6  -1 558.527 194.789   1
   8  -6   1 416.813 238.162   1
  -8   6  -2 299.367 157.048   1
   8  -6   2 440.512 230.934   1
  -8   6  -3-39.2010 100.002   1
   8  -6   3 185.381 169.388   1
  -8   6  -4 4616.52 566.596   1
   8  -6   4 3953.99 585.151   1
  -8   6  -5 5665.10 628.323   1
   8  -6   5 4953.45 699.084   1
  -8   5   5 5623.92 499.188   1
  -8   5   4 1093.57 218.512   1
  -8   5   3 2619.06 326.681   1
   8  -5  -2 651.063 304.149   1
  -8   5   2 1001.83 212.512   1
   8  -5  -1 4323.14 583.074   1
  -8   5   1 3316.90 404.387   1
   8  -5   0-138.139 157.237   1
  -8   5   0 5.25768 75.3421   1
   8  -5   1 2306.21 417.716   1
  -8   5  -1 2168.09 328.710   1
  -8   5  -2 1.06708 76.2723   1
   8  -5   2 277.363 166.985   1
  -8   5  -3 6230.36 590.908   1
   8  -5   3 5430.79 633.424   1
   8  -5   4 7222.39 760.889   1
  -8   5  -4 8796.33 709.219   1
  -8   5  -5 1941.24 346.485   1
   8  -5   5 1539.32 358.916   1
   8  -5   6 6410.96 708.142   1
  -8   5  -6 7370.67 683.608   1
   8  -5   7 1990.12 409.261   1
  -8   4   6 6403.19 453.253   1
  -8   4   5 394.553 134.861   1
  -8   4   4 10329.7 565.025   1
  -8   4   3 4446.37 373.818   1
  -8   4   2-40.0435 74.8613   1
   8  -4  -2-137.991 165.904   1
  -8   4   1-57.1081 78.5647   1
   8  -4  -1 138.109 151.029   1
  -8   4   0 1063.78 211.288   1
   8  -4   0 1230.97 290.390   1
  -8   4  -1 142.688 98.9136   1
   8  -4   1 187.877 131.573   1
   8  -4   2-87.3826 119.297   1
  -8   4  -2 123.605 103.815   1
   8  -4   3 14015.4 908.838   1
  -8   4  -3 15956.2 866.403   1
   8  -4   4 2698.22 408.087   1
  -8   4  -4 2901.19 379.162   1
   8  -4   5 1126.87 276.616   1
  -8   4  -5 1257.08 267.697   1
   8  -4   6 3547.71 489.765   1
  -8   4  -6 3794.74 467.265   1
   8  -4   7 610.260 224.570   1
   8  -4   8 49.8114 119.264   1
  -8   3   6 7215.55 432.525   1
  -8   3   5 95.6195 70.0129   1
  -8   3   4 87.4576 66.4124   1
  -8   3   3 1207.32 191.793   1
   8  -3  -2 3888.17 459.078   1
  -8   3   2 4123.15 346.525   1
   8  -3  -1 5070.80 511.124   1
  -8   3   1 5314.42 398.464   1
  -8   3   0 5932.25 434.706   1
   8  -3   0 5392.14 497.072   1
   8  -3   1 1133.15 246.764   1
  -8   3  -1 1348.46 225.451   1
   8  -3   2-108.817 102.761   1
  -8   3  -2 24.0834 66.1811   1
   8  -3   3 1040.07 229.983   1
  -8   3  -3 984.417 204.434   1
   8  -3   4 126.819 108.025   1
  -8   3  -4 34.5635 77.0149   1
   8  -3   5 9148.41 707.390   1
  -8   3  -5 9548.89 663.453   1
   8  -3   6 8312.62 726.509   1
   8  -3   7 564.931 221.613   1
   8  -3   8-723.629 254.212   1
   8  -3   9-86.9330 133.965   1
  -8   2   7 2234.92 206.187   1
  -8   2   6 618.432 109.639   1
  -8   2   5 15806.5 499.537   1
  -8   2   4 354.032 93.5992   1
  -8   2   3 215.137 75.8934   1
  -8   2   2 1241.97 165.037   1
   8  -2  -2 1132.01 224.833   1
   8  -2  -1 4221.34 411.636   1
  -8   2   1 3875.64 310.641   1
  -8   2   0 21405.8 739.344   1
   8  -2   0 22289.5 892.489   1
   8  -2   1 681.083 168.894   1
  -8   2  -1 626.468 139.415   1
   8  -2   2 15300.3 759.424   1
  -8   2  -2 15678.5 697.454   1
   8  -2   3 4767.70 442.615   1
  -8   2  -3 4532.14 393.692   1
   8  -2   4 456.619 165.034   1
   8  -2   5 6034.66 564.866   1
   8  -2   6 2317.42 363.504   1
   8  -2   7 6660.06 622.348   1
   8  -2   8 245.279 149.670   1
  -8   1   7 27.4520 28.2866   1
  -8   1   6 41.8582 26.7056   1
  -8   1   5 5070.15 205.574   1
  -8   1   4 11338.3 347.125   1
  -8   1   3 28707.7 582.150   1
   8  -1  -2 15143.1 688.061   1
  -8   1   2 14486.2 457.731   1
  -8   1   1 3280.72 238.307   1
   8  -1  -1 3258.40 294.213   1
   8  -1   0 8156.20 477.049   1
   8  -1   1 15.1865 53.1147   1
   8  -1   2 5296.22 430.161   1
   8  -1   3 2313.76 299.995   1
   8  -1   4 17426.2 823.046   1
   8  -1   5-6.44725 63.7417   1
   8  -1   6 323.090 138.609   1
   8  -1   7 487.793 171.372   1
  -8   0   9 305.265 47.3929   1
   8   0  -2 6447.20 381.168   1
   8   0  -1 1470.93 180.974   1
   8   0   0 3645.91 268.780   1
   8   0   1 723.630 143.523   1
   8   0   2 15169.6 639.327   1
   8   0   3 123.531 77.5031   1
   8   0   4 13867.6 692.762   1
   8   0   5 340.505 129.973   1
   8   1  -2 1475.79 132.114   1
   8   1  -1 3067.28 197.257   1
   8   1   0 1026.31 134.032   1
   8   1   1 3791.91 272.589   1
   8   1   2 4023.81 306.250   1
   8   1   3 13890.9 599.058   1
   8   2  -1 394.330 64.1474   1
   8   2   0 167.054 54.8624   1
   8   4  -3 188.339 40.0046   1
   8   4  -2 1892.69 182.213   1
   8   5  -5 161.287 50.5370   1
   8   5  -4 1413.19 132.657   1
   8   5  -3 3409.44 220.822   1
   8   6  -6 5517.68 312.454   1
   8   6  -5 1593.23 173.535   1
   8   6  -4 4043.01 292.707   1
   8   6  -3 180.519 83.7836   1
   8   7  -6 134.583 84.6570   1
   8   7  -5 10887.9 524.372   1
   8   7  -4 5073.00 364.208   1
   8   7  -3 3530.67 331.391   1
   8   8  -5 837.612 184.997   1
   8   8  -4 30.2732 74.4431   1
   8   8  -3 293.058 132.977   1
   8   9  -5 5237.84 484.594   1
   8   9  -4 965.227 211.944   1
   8  10  -4 2726.45 372.266   1
  -9   9   3 1990.81 387.795   1
  -9   8   4 1351.53 297.459   1
  -9   8   3 140.033 132.849   1
  -9   8   2 1522.59 327.478   1
   9  -8  -1-203.486 325.669   1
  -9   8   1 207.359 165.035   1
  -9   8   0-149.095 154.731   1
   9  -8   0-121.898 241.331   1
   9  -8   1 4689.20 808.957   1
  -9   7   4-117.318 114.898   1
  -9   7   3 1.51416 84.5333   1
  -9   7   2 1762.51 332.503   1
   9  -7  -1 1666.27 509.783   1
  -9   7   1 2496.20 416.430   1
  -9   7   0 577.888 216.025   1
   9  -7   0 524.477 294.687   1
  -9   7  -1 338.896 176.914   1
   9  -7   1 216.165 245.672   1
  -9   7  -2 2772.27 442.170   1
   9  -7   2 2558.32 563.178   1
   9  -7   3 2881.77 588.874   1
  -9   6   5 3914.64 427.409   1
  -9   6   4 2147.66 319.230   1
  -9   6   3 1210.28 245.902   1
   9  -6  -2 3089.27 648.859   1
  -9   6   2 3537.87 442.109   1
   9  -6  -1 1126.97 360.399   1
  -9   6   1 983.057 249.922   1
  -9   6   0 982.537 246.090   1
   9  -6   0 687.494 312.007   1
   9  -6   1 283.801 222.203   1
  -9   6  -1 166.753 130.884   1
  -9   6  -2 547.368 199.788   1
   9  -6   2 559.948 267.360   1
  -9   6  -3 3791.24 508.718   1
   9  -6   3 3283.52 548.421   1
   9  -6   4 1060.75 329.885   1
  -9   6  -4 1219.64 301.545   1
  -9   5   6 4533.94 427.096   1
  -9   5   5 11863.3 660.802   1
  -9   5   4 1572.17 250.359   1
  -9   5   3 136.257 104.569   1
  -9   5   2 97.2478 102.846   1
   9  -5  -2 469.682 288.578   1
   9  -5  -1 7549.38 782.166   1
  -9   5   1 7460.68 582.096   1
   9  -5   0 685.983 268.706   1
  -9   5   0 1045.88 232.147   1
  -9   5  -1 1015.59 234.562   1
   9  -5   1 1139.32 326.445   1
  -9   5  -2 1283.21 277.873   1
   9  -5   2 1324.15 325.607   1
   9  -5   3 2097.28 410.510   1
  -9   5  -3 3194.68 429.562   1
   9  -5   4 305.040 202.736   1
  -9   5  -4 459.637 184.119   1
  -9   5  -5-53.0300 107.338   1
   9  -5   5 106.507 148.398   1
  -9   5  -6 2879.90 446.220   1
   9  -5   6 1004.84 313.983   1
  -9   4   7 94.8066 88.1545   1
  -9   4   6 270.104 109.733   1
  -9   4   5 308.052 113.070   1
  -9   4   4 214.484 102.096   1
  -9   4   3 203.596 108.808   1
  -9   4   2 6497.69 484.335   1
   9  -4  -2 6138.06 713.101   1
   9  -4  -1 6076.90 673.338   1
  -9   4   1 7726.46 538.114   1
   9  -4   0 13084.6 930.734   1
  -9   4   0 13751.1 733.862   1
   9  -4   1-79.6357 122.316   1
  -9   4  -1 59.6566 95.0605   1
  -9   4  -2 10921.9 711.100   1
   9  -4   2 13350.2 916.196   1
   9  -4   3-27.1670 113.522   1
  -9   4  -3 84.9588 98.4224   1
   9  -4   4 398.381 188.723   1
  -9   4  -4 380.052 160.504   1
   9  -4   5-176.040 144.267   1
  -9   4  -5 103.447 114.209   1
   9  -4   6 31.0405 113.000   1
  -9   4  -6 270.348 153.366   1
   9  -4   7 264.649 175.502   1
  -9   3   7-50.9599 63.2255   1
  -9   3   6 191.774 81.0018   1
  -9   3   5 690.783 136.077   1
  -9   3   4 3081.70 290.307   1
  -9   3   3 5643.43 388.627   1
   9  -3  -2 1023.23 266.372   1
  -9   3   2 1042.84 178.486   1
  -9   3   1 32.8174 65.2750   1
   9  -3  -1 22.5308 107.188   1
   9  -3   0 686.649 203.896   1
  -9   3   0 962.865 187.446   1
   9  -3   1 1429.97 279.466   1
  -9   3  -1 1241.04 217.046   1
   9  -3   2 3679.37 439.057   1
  -9   3  -2 4377.92 411.076   1
   9  -3   3 112.704 110.260   1
  -9   3  -3 22.8828 76.1805   1
   9  -3   4 1532.62 301.777   1
  -9   3  -4 1700.12 283.889   1
   9  -3   5 6694.84 616.960   1
   9  -3   6 4468.49 542.565   1
   9  -3   7 1173.77 312.120   1
   9  -3   8 1521.49 366.278   1
  -9   2   7 2174.20 174.506   1
  -9   2   6 842.293 120.026   1
  -9   2   5 10955.1 415.781   1
  -9   2   4 253.293 77.2042   1
  -9   2   3 2054.78 208.733   1
  -9   2   2 5773.27 358.648   1
   9  -2  -2 6227.19 522.598   1
   9  -2  -1 1735.89 286.045   1
  -9   2   1 1864.03 213.796   1
   9  -2   0 290.027 125.203   1
  -9   2   0 322.265 105.056   1
  -9   2  -1 1186.65 193.977   1
   9  -2   1 988.461 211.737   1
   9  -2   2 14017.2 750.106   1
   9  -2   3 169.751 108.163   1
   9  -2   4 914.404 225.686   1
   9  -2   5 139.002 123.861   1
   9  -2   6 496.399 195.725   1
   9  -2   7 1350.99 309.017   1
   9  -2   8 2679.82 435.887   1
  -9   1   5 183.444 39.8077   1
  -9   1   4 548.352 76.2817   1
   9  -1  -2 134.719 104.546   1
   9  -1  -1 3436.72 328.311   1
   9  -1   0-22.7786 69.4021   1
   9  -1   1 8836.08 527.397   1
   9  -1   2 3000.25 329.687   1
   9  -1   3 15612.3 818.751   1
   9  -1   4 1454.03 263.154   1
   9  -1   5 4156.30 444.640   1
   9  -1   6 3782.17 442.582   1
   9  -1   7 41.3061 92.8054   1
   9   0  -2 411.330 120.483   1
   9   0  -1 1489.97 190.850   1
   9   0   0 845.578 146.416   1
   9   0   1 8728.28 501.264   1
   9   0   2 33035.5 1016.07   1
   9   0   3 17076.4 758.507   1
   9   0   4 173.246 99.1486   1
   9   0   5 1389.34 246.651   1
   9   1  -2 19.9439 41.2349   1
   9   1  -1 22325.5 583.783   1
   9   1   0 1653.09 190.926   1
   9   1   1 4467.11 318.533   1
   9   1   2 939.304 161.663   1
   9   1   3 12684.3 621.666   1
   9   2  -1 440.518 79.8473   1
   9   2   0 2245.07 188.114   1
   9   2   1 71.9130 55.1784   1
   9   3  -1 395.552 64.7661   1
   9   4  -2 118.260 48.5274   1
   9   5  -4 11.8114 17.3485   1
   9   5  -3-31.9084 28.8581   1
   9   6  -5 753.643 104.465   1
   9   6  -4 4552.74 262.188   1
   9   6  -3 715.324 119.709   1
   9   7  -4 5128.33 354.686   1
   9   7  -3 201.247 96.6729   1
   9   8  -4 957.739 178.409   1
   9   8  -3 1242.06 220.010   1
 -10   8   4 85.6151 116.895   1
 -10   8   3-107.326 133.198   1
 -10   8   2 940.668 285.137   1
 -10   8   1-22.6787 120.665   1
  10  -8  -1 166.044 335.665   1
 -10   7   5 204.034 134.159   1
 -10   7   4 232.323 138.911   1
 -10   7   3 90.7908 123.678   1
 -10   7   2 1258.62 297.131   1
  10  -7  -1 2732.91 658.395   1
 -10   7   1 3439.23 469.538   1
  10  -7   0 3074.43 618.424   1
 -10   7   0 2654.37 420.974   1
 -10   7  -1 51.2766 115.694   1
  10  -7   1 468.836 317.343   1
  10  -7   2 4354.13 737.470   1
 -10   6   6-76.4118 93.4732   1
 -10   6   5-58.1928 90.8832   1
 -10   6   4 2600.40 355.329   1
 -10   6   3 1258.92 273.102   1
 -10   6   2 62.1854 105.320   1
 -10   6   1-30.9392 95.4461   1
  10  -6  -1 126.221 212.232   1
 -10   6   0 58.3607 104.872   1
  10  -6   0-220.951 235.575   1
 -10   6  -1 404.890 178.138   1
  10  -6   1 755.830 318.924   1
  10  -6   2 4123.72 664.071   1
 -10   6  -2 4538.96 552.355   1
  10  -6   3 681.455 290.588   1
 -10   6  -3 726.082 239.680   1
 -10   5   6 495.501 147.885   1
 -10   5   5-32.6464 76.2987   1
 -10   5   4-84.9230 97.2489   1
 -10   5   3 951.966 215.731   1
  10  -5  -2 273.755 268.344   1
 -10   5   2 328.052 140.051   1
  10  -5  -1 344.297 223.380   1
 -10   5   1 206.527 123.079   1
 -10   5   0 711.029 199.162   1
  10  -5   0 201.683 203.643   1
  10  -5   1 3169.02 534.792   1
 -10   5  -1 3825.24 464.734   1
  10  -5   2 0.28120 123.260   1
 -10   5  -2-45.9128 101.321   1
 -10   5  -3 3366.59 442.117   1
  10  -5   3 2756.23 476.460   1
  10  -5   4 2357.46 476.996   1
 -10   5  -4 2867.04 422.639   1
 -10   5  -5 4686.81 560.756   1
  10  -5   5 3309.40 570.788   1
 -10   4   6 12849.5 593.123   1
 -10   4   5 194.933 103.879   1
 -10   4   4 303.388 119.126   1
 -10   4   3 1152.87 206.501   1
 -10   4   2 265.423 116.530   1
  10  -4  -2 1991.15 454.673   1
 -10   4   1-29.0016 76.2191   1
  10  -4  -1-221.863 191.409   1
  10  -4   0 6013.97 666.878   1
 -10   4   0 6715.96 531.610   1
 -10   4  -1 11309.0 707.733   1
  10  -4   1 9688.97 802.039   1
 -10   4  -2 5215.47 491.502   1
  10  -4   2 4682.33 557.049   1
  10  -4   3 448.930 217.184   1
 -10   4  -3 1156.11 253.103   1
 -10   4  -4 1399.72 286.062   1
  10  -4   4 1239.64 317.506   1
 -10   4  -5 1295.25 285.393   1
  10  -4   5 1304.77 325.899   1
  10  -4   6 1284.67 328.660   1
 -10   3   6 3164.98 270.327   1
 -10   3   5 3151.73 270.297   1
 -10   3   4 2235.41 237.477   1
 -10   3   3 59.9949 67.5345   1
  10  -3  -2-100.998 160.139   1
 -10   3   2 26.5958 65.7878   1
  10  -3  -1 160.471 156.815   1
 -10   3   1 250.753 107.104   1
  10  -3   0 168.791 140.622   1
 -10   3   0-103.188 84.1991   1
  10  -3   1 895.025 233.110   1
 -10   3  -1 1091.07 210.158   1
 -10   3  -2 4814.34 442.770   1
  10  -3   2 3701.31 485.078   1
  10  -3   3 6211.25 603.019   1
 -10   3  -3 6926.66 549.753   1
  10  -3   4 52.7378 105.156   1
  10  -3   5-133.308 131.444   1
  10  -3   6-76.4390 119.489   1
  10  -3   7 1057.58 300.017   1
 -10   2   5-23.6455 40.3719   1
 -10   2   4 191.302 70.1168   1
 -10   2   3 1411.75 168.670   1
 -10   2   2 4561.17 320.484   1
  10  -2  -2 5128.00 503.111   1
 -10   2   1 40.4067 59.2751   1
  10  -2  -1 193.022 137.015   1
  10  -2   0-4.04183 79.2078   1
  10  -2   1 2158.45 336.073   1
  10  -2   2 3112.37 383.426   1
  10  -2   3 6726.01 574.289   1
  10  -2   4 2509.10 363.398   1
  10  -2   5 557.659 203.118   1
  10  -2   6-165.576 147.031   1
  10  -2   7 1908.74 384.480   1
  10  -2   8 1926.40 398.878   1
  10  -1  -2 270.083 133.099   1
  10  -1  -1 5442.26 447.828   1
  10  -1   0 569.669 163.719   1
  10  -1   1 725.573 172.662   1
  10  -1   2 322.913 128.569   1
  10  -1   3 878.806 210.511   1
  10  -1   4 1250.18 264.057   1
  10  -1   5 3515.38 438.543   1
  10  -1   6 4616.76 512.774   1
  10  -1   7-67.2996 108.093   1
  10   0  -2 1754.14 231.831   1
  10   0  -1 677.790 141.326   1
  10   0   0 410.357 118.918   1
  10   0   1 1102.29 184.434   1
  10   0   2 73.5771 85.1499   1
  10   0   3 5950.32 479.404   1
  10   0   4 137.832 100.383   1
  10   0   5 1548.03 272.770   1
  10   1  -2 131.371 68.2623   1
  10   1  -1 16216.2 574.445   1
  10   1   0 234.904 83.6081   1
  10   1   1 7656.22 455.398   1
  10   1   2 2743.51 286.016   1
  10   1   3 60.2677 72.1355   1
  10   2  -1 70.7677 43.5886   1
  10   2   0 2464.04 214.137   1
  10   2   1 259.246 87.3691   1
  10   2   2 3013.40 281.892   1
  10   3  -1 3367.46 191.728   1
  10   3   0 15480.3 492.565   1
  10   5  -2 3.69873 35.9071   1
  10   6  -3 10009.8 350.150   1
 -11   8   4 2444.57 415.024   1
 -11   8   3 1841.80 372.212   1
 -11   8   2-169.157 153.062   1
 -11   7   4 91.5109 127.800   1
 -11   7   3-146.351 136.616   1
 -11   7   2 1292.07 291.216   1
  11  -7  -1 1816.99 593.515   1
 -11   7   1 2271.25 383.931   1
 -11   7   0-149.595 139.844   1
  11  -7   0-109.373 231.160   1
 -11   6   4 77.9502 111.450   1
 -11   6   3 234.223 138.250   1
 -11   6   2 3107.83 403.272   1
 -11   6   1-129.253 122.106   1
  11  -6  -1 40.0156 220.664   1
 -11   6   0-308.154 165.855   1
  11  -6   0 7420.25 921.780   1
  11  -6   1 1869.61 491.832   1
 -11   6  -1 1976.64 366.100   1
  11  -6   2 769.838 335.341   1
 -11   6  -2 1123.25 286.275   1
 -11   5   4 718.617 180.627   1
 -11   5   3 2282.96 311.944   1
 -11   5   2 766.330 195.472   1
  11  -5  -2 774.919 373.346   1
 -11   5   1 463.552 168.205   1
  11  -5  -1 169.072 201.685   1
  11  -5   0 1967.55 471.947   1
 -11   5   0 3199.83 406.676   1
  11  -5   1 76.6244 174.016   1
 -11   5  -1 39.5686 98.3457   1
  11  -5   2 368.492 226.276   1
 -11   5  -2 1076.59 255.851   1
  11  -5   3 1228.36 343.973   1
 -11   5  -3 1760.01 332.843   1
  11  -5   4 748.215 293.074   1
 -11   5  -4 963.309 265.012   1
 -11   4   3 576.545 153.100   1
  11  -4  -2 674.623 323.667   1
 -11   4   2 1514.58 250.950   1
  11  -4  -1 970.744 311.275   1
 -11   4   1 800.596 191.008   1
  11  -4   0 7643.31 776.871   1
 -11   4   0 7597.69 559.552   1
  11  -4   1 329.741 198.450   1
 -11   4  -1 39.4394 86.9620   1
  11  -4   2 933.559 276.816   1
 -11   4  -2 1297.80 263.465   1
  11  -4   3 373.321 211.058   1
 -11   4  -3 85.5147 108.442   1
  11  -4   4 593.314 255.152   1
  11  -4   5-38.8925 133.427   1
 -11   3   3 12647.0 577.046   1
 -11   3   2 4458.39 358.135   1
  11  -3  -2 4250.56 595.245   1
  11  -3  -1 6199.80 671.112   1
 -11   3   1 7343.33 484.280   1
 -11   3   0 288.953 120.060   1
  11  -3   0 279.897 177.674   1
  11  -3   1 101.725 124.406   1
 -11   3  -1-65.7181 84.9332   1
  11  -3   2 583.301 223.133   1
  11  -3   3 414.077 192.275   1
  11  -3   4-58.4319 118.683   1
  11  -3   5 642.164 231.559   1
  11  -3   6 316.147 185.015   1
  11  -2  -2 1450.92 314.784   1
  11  -2  -1 542.133 202.831   1
  11  -2   0 16.5261 97.0695   1
  11  -2   1 183.170 135.833   1
  11  -2   2 252.954 145.618   1
  11  -2   3 62.1945 101.410   1
  11  -2   4 6371.35 598.355   1
  11  -2   5 2187.98 371.063   1
  11  -2   6 621.139 232.236   1
  11  -2   7-213.548 170.625   1
  11  -1  -2 292056. 3504.50   1
  11  -1  -1 436.524 165.252   1
  11  -1   0-194.505 115.873   1
  11  -1   1 14585.0 776.786   1
  11  -1   2 223.395 121.938   1
  11  -1   3 293.867 135.867   1
  11  -1   4 431.272 176.083   1
  11  -1   5 3400.16 460.977   1
  11  -1   6 249.304 158.394   1
  11  -1   7 1666.04 346.026   1
  11   0  -2 9376.31 538.416   1
  11   0  -1 993.877 187.185   1
  11   0   0 10096.7 584.340   1
  11   0   1 31.9592 73.0366   1
  11   0   2 57.0098 83.0506   1
  11   0   3-244.678 131.173   1
  11   0   4 1658.72 289.037   1
  11   0   5 95.2813 105.249   1
  11   1  -1 173.973 80.6941   1
  11   1   0 36.7484 61.3691   1
  11   1   1 8058.37 492.589   1
  11   1   2-22.1765 69.8187   1
  11   1   3 2332.12 297.185   1
  11   1   4-12.3362 71.4481   1
  11   2  -1 114.779 58.1698   1
  11   2   0 6473.12 376.351   1
  11   2   1 268.909 96.5668   1
  11   2   2 3437.28 314.291   1
  11   3  -1 300.305 66.4874   1
  11   3   0 2681.45 217.313   1
  11   4  -1 759.129 94.2367   1
 -12   7   1 602.345 215.946   1
  12  -7  -1 276.419 364.191   1
  12  -6  -1 3342.88 711.903   1
 -12   6   1 4137.98 494.174   1
 -12   6   0 1057.25 263.296   1
  12  -6   0 586.076 319.012   1
  12  -6   1 145.724 246.477   1
 -12   6  -1 461.729 193.687   1
  12  -5  -1 717.885 324.759   1
 -12   5   1 243.040 135.419   1
  12  -5   0 691.936 326.858   1
 -12   5   0 1284.32 262.248   1
  12  -5   1 490.115 276.658   1
 -12   5  -1 387.702 166.273   1
 -12   5  -2 2465.41 385.327   1
  12  -5   2 2030.04 475.318   1
  12  -5   3 851.644 315.085   1
 -12   5  -3 991.971 262.997   1
  12  -4  -2 1994.54 508.798   1
 -12   4   1 319.449 131.561   1
  12  -4  -1-6.44880 156.753   1
  12  -4   0 94.5417 184.418   1
 -12   4   0 469.539 160.640   1
 -12   4  -1 138.320 112.864   1
  12  -4   1 422.586 237.385   1
 -12   4  -2 2173.11 336.223   1
  12  -4   2 1832.70 395.093   1
  12  -4   3-81.2253 150.137   1
  12  -4   4 1558.17 400.459   1
  12  -3  -2 375.136 265.332   1
  12  -3  -1 1507.70 361.144   1
  12  -3   0 6645.18 695.888   1
  12  -3   1 7.30343 117.144   1
  12  -3   2 1681.48 348.239   1
  12  -3   3 1832.56 392.693   1
  12  -3   4 4739.55 602.689   1
  12  -3   5 3848.83 543.724   1
  12  -2  -2-55.3825 177.734   1
  12  -2  -1 1473.19 331.485   1
  12  -2   0 224.948 158.449   1
  12  -2   1 650.737 208.081   1
  12  -2   2 329.687 178.339   1
  12  -2   3 1041.04 264.557   1
  12  -2   4 536.731 203.712   1
  12  -2   5 1168.05 291.321   1
  12  -2   6-183.464 154.460   1
  12  -1  -2 50.3920 150.760   1
  12  -1  -1 1036.78 245.200   1
  12  -1   0 457.131 163.630   1
  12  -1   1-150.285 128.886   1
  12  -1   2-54.7490 99.2929   1
  12  -1   3-190.190 130.256   1
  12  -1   4 841.654 228.392   1
  12  -1   5-478.932 200.899   1
  12  -1   6 600.063 235.545   1
  12   0  -1 6140.84 483.260   1
  12   0   0 401.141 145.373   1
  12   0   1 398.397 142.412   1
  12   0   2-56.3130 87.8943   1
  12   0   3 1213.96 249.898   1
  12   0   4 5843.44 565.471   1
  12   0   5 2030.80 349.754   1
  12   1  -1 788.022 156.878   1
  12   1   0-4.40865 68.0595   1
  12   1   1 302.075 114.159   1
  12   1   2 3168.51 355.442   1
  12   1   3-39.8321 86.7413   1
  12   1   4 110.611 104.436   1
  12   2  -1 443.001 100.325   1
  12   2   0 1550.20 191.504   1
  12   2   1 321.481 117.816   1
  12   2   2-125.286 89.8796   1
  12   3   0 815.739 138.693   1
  12   3   1 1068.79 168.466   1
  12   4   0 1826.05 179.506   1
  13  -6  -1 2105.18 630.696   1
  13  -6   0 1429.32 458.293   1
  13  -5  -1 2165.36 556.287   1
  13  -5   0 850.167 355.732   1
  13  -5   1 103.791 217.878   1
 -13   5  -2 91.4838 121.731   1
  13  -5   2-140.258 217.608   1
  13  -4   0 3078.89 576.247   1
  13  -4   1 787.450 312.620   1
  13  -4   2 2.80096 146.984   1
  13  -4   3-262.925 201.443   1
  13  -3   0 674.481 270.709   1
  13  -3   1 1633.53 375.843   1
  13  -3   2-108.938 148.995   1
  13  -3   3 434.381 227.452   1
  13  -3   4 2110.33 442.746   1
  13  -3   5 4084.92 591.051   1
  13  -2   0 767.791 256.912   1
  13  -2   1 489.961 200.837   1
  13  -2   2 90.1021 140.466   1
  13  -2   3 1610.62 339.995   1
  13  -2   4 172.076 154.539   1
  13  -2   5 806.670 261.349   1
  13  -2   6 2130.48 410.867   1
  13  -1   0 1635.99 304.368   1
  13  -1   1 67.4561 115.652   1
  13  -1   2 87.1398 120.275   1
  13  -1   3 1722.96 316.605   1
  13  -1   4 376.650 178.448   1
  13  -1   5 2221.09 384.294   1
  13  -1   6 2803.15 466.326   1
  13   0   1-78.0232 110.709   1
  13   0   2 3059.47 369.479   1
  13   0   3 1522.90 276.165   1
  13   0   4-57.6916 115.935   1
  13   0   5 208.531 161.583   1
  13   1   1 73.3905 88.3452   1
  13   1   2 503.400 154.463   1
  13   1   3 146.293 121.002   1
  13   1   4 1220.47 265.935   1
  13   2   2 2321.45 303.541   1
  13   2   3 209.606 117.984   1
  14  -3   3-194.317 183.120   1
  14  -3   4 1366.48 382.838   1
  14  -2   3 511.974 238.661   1
  14  -2   4 127.550 158.979   1
  14  -2   5 1083.41 311.553   1
  14  -1   3 1433.26 315.767   1
  14  -1   4-88.3623 131.425   1
  14  -1   5 1110.60 296.246   1
  14  -1   6 2168.65 407.779   1
  14   0   4 140.563 131.583   1
  14   0   5 641.294 229.063   1
  14   1   4 1427.80 301.236   1
   0   0   0    0.00    0.00   0
TITL Coes_C1_P1_s1 in P-1
REM P-1 (#2 in standard setting)
CELL 0.28965   6.558587   6.902903   8.542874  69.5991  83.0353  81.9332
ZERR   16.00   0.000380   0.000668   0.000838   0.0089   0.0063   0.0062
LATT  1
SFAC O Si
UNIT 32.00 16.00
TREF
HKLF 4
END
;
_shelx_hkl_checksum              40414

# start Validation Reply Form
_vrf_PLAT029_Coesite-IV_44.18GPa
;
PROBLEM: _diffrn_measured_fraction_theta_full value Low .      0.370 Why?  
RESPONSE: The dataset was incomplete since the data were collected in
 a diamond anvil cell metallic body of which shadows
 more than 60% of the reflections.

;
_vrf_PLAT911_Coesite-IV_44.18GPa
;
PROBLEM: Missing FCF Refl Between Thmin & STh/L=    0.600        808 Report
RESPONSE: Certain part of the reflections is missing due to geometry 
of the experiment. The metallic body of the diamond anvil cell 
absorbs more than 60% of the reflections.
;

# end Validation Reply Form
