# Supplementary material for: Metastable silica high pressure polymorphs as structural proxies of deep Earth silicate melts
Source: Nat Commun. 2018 Nov 15;9:4789. doi: 10.1038/s41467-018-07265-z (PMC6237875; doi:10.1038/s41467-018-07265-z)
Supplement: Supplementary file 8 — Supplementary Data 5 [file 41467_2018_7265_MOESM8_ESM.cif]

 
data_Coesite-IV_49.31GPa
 
_publ_requested_journal          'Nature (London)'

_publ_contact_author_name        'Elena Bykova'
_publ_contact_author_address     
;P02.2 Extreme Conditions Beamline, Deutsches Elektronen-Synchrotron
Notkestra\&se 85,
Hamburg, D-22607
Germany
;
_publ_contact_author_email       elena.bykova@desy.de
_publ_contact_author_phone       49(0)4089985674

loop_
_publ_author_name
_publ_author_address
'Bykova, E.'
;P02.2 Extreme Conditions Beamline, Deutsches Elektronen-Synchrotron
Notkestra\&se 85,
Hamburg, D-22607
Germany
;
'\<Cernok, A.'
;School of Physical Sciences, Lunar Research Group,
The Open University 
Milton Keynes, MK7 6AA
England  
;
'Bykov, M.'
;Bayerisches Geoinstitut
University of Bayreuth, Universitaetsstrasse 30
Bayreuth, D-95440
Germany
;
'Tidholm, J.'
;Department of Physics, Chemistry and Biology (IFM), 
Link\"oping University, 
Link\"oping, SE-58183
Sweden
;
'Abrikosov, I.'
;Department of Physics, Chemistry and Biology (IFM), 
Link\"oping University, 
Link\"oping, SE-58183
Sweden
;
'Liermann, H.-P.'
;P02.2 Extreme Conditions Beamline, Deutsches Elektronen-Synchrotron
Notkestra\&se 85,
Hamburg, D-22607
Germany
;
'Hanfland M.'
;European Synchrotron Radiation Facility, 
BP 220, Grenoble F-38043, 
France
;
'Dubrovinsky, L.'
;Bayerisches Geoinstitut
University of Bayreuth, Universitaetsstrasse 30
Bayreuth, D-95440
Germany
;

_audit_creation_method           SHELXL-2014/7
_chemical_name_systematic        'silicon dioxide'
_chemical_name_common            'silicon dioxide'
_chemical_formula_moiety         'O2 Si'
_chemical_formula_sum            'O2 Si'
_chemical_melting_point          ?

_exptl_crystal_description       plate
_exptl_crystal_colour            'clear colourless'

_diffrn_ambient_temperature      296(2)
_diffrn_ambient_pressure         49310000
_chemical_formula_weight         60.09


loop_
 _atom_type_symbol
 _atom_type_description
 _atom_type_scat_dispersion_real
 _atom_type_scat_dispersion_imag
 _atom_type_scat_source
 'O'  'O'  -0.0010   0.0008
 'International Tables Vol C Tables 4.2.6.8 and 6.1.1.4'
 'Si'  'Si'   0.0082   0.0107
 'International Tables Vol C Tables 4.2.6.8 and 6.1.1.4'
 
_space_group_crystal_system       triclinic
_space_group_IT_number            2
_space_group_name_H-M_alt         'P -1'
_space_group_name_Hall            '-P 1'
 
_shelx_space_group_comment
;
The symmetry employed for this shelxl refinement is uniquely defined
by the following loop, which should always be used as a source of
symmetry information in preference to the above space-group names.
They are only intended as comments.
;
 
loop_
 _space_group_symop_operation_xyz
 'x, y, z'
 '-x, -y, -z'
 
_cell_length_a                    6.5175(8)
_cell_length_b                    6.8754(12)
_cell_length_c                    8.4943(15)
_cell_angle_alpha                 69.612(16)
_cell_angle_beta                  83.289(12)
_cell_angle_gamma                 81.990(12)
_cell_volume                      352.35(10)
_cell_formula_units_Z             16
_cell_measurement_temperature     296(2)
_cell_measurement_reflns_used   620
_cell_measurement_theta_min     1.9193
_cell_measurement_theta_max     19.6480

_exptl_crystal_density_meas       ?
_exptl_crystal_density_method     ?
_exptl_crystal_density_diffrn     4.531          
_exptl_crystal_F_000              480
_exptl_transmission_factor_min    ?
_exptl_transmission_factor_max    ?
_exptl_crystal_size_max           0.020
_exptl_crystal_size_mid           0.020
_exptl_crystal_size_min           0.005
_exptl_absorpt_coefficient_mu     0.188
_shelx_estimated_absorpt_T_min    0.996
_shelx_estimated_absorpt_T_max    0.999
_exptl_absorpt_correction_T_min                   0.19007
_exptl_absorpt_correction_T_max                   1.00000
_exptl_absorpt_correction_type            'multi-scan'
_exptl_absorpt_process_details
;
CrysAlisPro, Agilent Technologies,
Version 1.171.36.18t (release 05-06-2012 CrysAlis171 .NET)
(compiled Jun  5 2012,17:40:27)
Empirical absorption correction using spherical harmonics,
 implemented in SCALE3 ABSPACK scaling algorithm.
;


_diffrn_radiation_probe          x-ray
_diffrn_radiation_type           synchrotron
_diffrn_radiation_wavelength     0.28965
_diffrn_source                   synchrotron
_diffrn_source_type              'P02.2 Extreme Conditions Beamline, DESY'
_diffrn_measurement_device_type  
;
customized \w-circle diffractometer
;
_diffrn_measurement_method       '\w scans'


_diffrn_detector_area_resol_mean  ?
_diffrn_reflns_number             1524
_diffrn_reflns_av_unetI/netI      0.0570
_diffrn_reflns_av_R_equivalents   0.0397
_diffrn_reflns_limit_h_min        -9
_diffrn_reflns_limit_h_max        10
_diffrn_reflns_limit_k_min        -9
_diffrn_reflns_limit_k_max        9
_diffrn_reflns_limit_l_min        -8
_diffrn_reflns_limit_l_max        11
_diffrn_reflns_theta_min          1.919
_diffrn_reflns_theta_max          12.872
_diffrn_reflns_theta_full         10.500
_diffrn_measured_fraction_theta_max   0.360
_diffrn_measured_fraction_theta_full  0.366
_diffrn_reflns_Laue_measured_fraction_max    0.360
_diffrn_reflns_Laue_measured_fraction_full   0.366
_diffrn_reflns_point_group_measured_fraction_max   0.360
_diffrn_reflns_point_group_measured_fraction_full  0.366
_reflns_number_total              968
_reflns_number_gt                 798
_reflns_threshold_expression      'I > 2\s(I)'
_reflns_Friedel_coverage          0.000
_reflns_Friedel_fraction_max      .
_reflns_Friedel_fraction_full     .
 
_reflns_special_details
;
 Reflections were merged by SHELXL according to the crystal
 class for the calculation of statistics and refinement.
 
 _reflns_Friedel_fraction is defined as the number of unique
 Friedel pairs measured divided by the number that would be
 possible theoretically, ignoring centric projections and
 systematic absences.
;
 
_computing_data_collection       
;
CrysAlisPro, Agilent Technologies,
Version 1.171.36.18t (release 05-06-2012 CrysAlis171 .NET)
(compiled Jun  5 2012,17:40:27)
;
_computing_cell_refinement       
;
CrysAlisPro, Agilent Technologies,
Version 1.171.36.18t (release 05-06-2012 CrysAlis171 .NET)
(compiled Jun  5 2012,17:40:27)
;
_computing_data_reduction        
;
CrysAlisPro, Agilent Technologies,
Version 1.171.36.18t (release 05-06-2012 CrysAlis171 .NET)
(compiled Jun  5 2012,17:40:27)
;

_computing_structure_solution    'SHELXS-2013/1 (Sheldrick, 2013)'
_computing_structure_refinement  'SHELXL-2014/7 (Sheldrick, 2014)'
_computing_molecular_graphics     ?
_computing_publication_material   ?
_refine_special_details           ?
_refine_ls_structure_factor_coef  Fsqd
_refine_ls_matrix_type            full
_refine_ls_weighting_scheme       calc
_refine_ls_weighting_details
'w=1/[\s^2^(Fo^2^)+(0.1036P)^2^] where P=(Fo^2^+2Fc^2^)/3'
_atom_sites_solution_primary      ?
_atom_sites_solution_secondary    ?
_atom_sites_solution_hydrogens    .
_refine_ls_hydrogen_treatment     .
_refine_ls_extinction_method      none
_refine_ls_extinction_coef        .
_refine_ls_number_reflns          968
_refine_ls_number_parameters      97
_refine_ls_number_restraints      0
_refine_ls_R_factor_all           0.0759
_refine_ls_R_factor_gt            0.0628
_refine_ls_wR_factor_ref          0.1740
_refine_ls_wR_factor_gt           0.1635
_refine_ls_goodness_of_fit_ref    1.124
_refine_ls_restrained_S_all       1.124
_refine_ls_shift/su_max           0.000
_refine_ls_shift/su_mean          0.000
 
loop_
 _atom_site_label
 _atom_site_type_symbol
 _atom_site_fract_x
 _atom_site_fract_y
 _atom_site_fract_z
 _atom_site_U_iso_or_equiv
 _atom_site_adp_type
 _atom_site_occupancy
 _atom_site_site_symmetry_order  
 _atom_site_calc_flag
 _atom_site_refinement_flags_posn
 _atom_site_refinement_flags_adp
 _atom_site_refinement_flags_occupancy
 _atom_site_disorder_assembly
 _atom_site_disorder_group
Si1 Si 0.3455(3) 0.6507(4) 0.4585(4) 0.0117(4) Uiso 1 1 d . . . . .
O1 O 0.3400(7) 0.8503(11) 0.5268(10) 0.0139(8) Uiso 1 1 d . . . . .
Si2 Si 0.1950(3) 0.5148(4) 0.9956(3) 0.0126(4) Uiso 1 1 d . . . . .
O2 O 0.4681(7) 0.7891(11) 0.2613(9) 0.0125(8) Uiso 1 1 d . . . . .
Si3 Si 0.0987(3) 0.3168(4) 0.6523(4) 0.0123(4) Uiso 1 1 d . . . . .
O3 O 0.1515(7) 0.6828(10) 0.3278(9) 0.0114(8) Uiso 1 1 d . . . . .
Si4 Si 0.4973(3) 0.3148(4) 0.2769(3) 0.0132(4) Uiso 1 1 d . . . . .
O4 O 0.1791(7) 0.5305(11) 0.6189(9) 0.0149(9) Uiso 1 1 d . . . . .
Si5 Si 0.3484(3) 0.1254(4) 0.9178(3) 0.0120(4) Uiso 1 1 d . . . . .
O5 O 0.4558(7) 0.4323(10) 0.4141(8) 0.0124(8) Uiso 1 1 d . . . . .
Si6 Si 0.1946(3) 0.0642(4) 0.4476(4) 0.0130(4) Uiso 1 1 d . . . . .
O6 O 0.0918(7) 0.7407(10) 0.0437(9) 0.0118(8) Uiso 1 1 d . . . . .
Si7 Si 0.0399(3) 0.8619(4) 0.8374(3) 0.0120(4) Uiso 1 1 d . . . . .
O7 O 0.3741(7) 0.5149(11) 0.1283(9) 0.0122(8) Uiso 1 1 d . . . . .
Si8 Si 0.2877(3) 0.7692(4) 0.1399(3) 0.0118(4) Uiso 1 1 d . . . . .
O8 O 0.0375(7) 0.3760(11) 0.1414(9) 0.0137(8) Uiso 1 1 d . . . . .
O9 O 0.1853(7) 0.0256(10) 0.1019(9) 0.0119(8) Uiso 1 1 d . . . . .
O10 O 0.3615(7) 0.1416(11) 0.2885(9) 0.0142(8) Uiso 1 1 d . . . . .
O11 O 0.1576(7) 0.2732(11) 0.4817(10) 0.0163(9) Uiso 1 1 d . . . . .
O12 O 0.1755(7) 0.0945(10) 0.7954(9) 0.0125(8) Uiso 1 1 d . . . . .
O13 O 0.2752(7) 0.3620(11) 0.8974(9) 0.0143(8) Uiso 1 1 d . . . . .
O14 O 0.2844(7) 0.7172(10) 0.8208(9) 0.0122(8) Uiso 1 1 d . . . . .
O15 O 0.0041(7) 0.9632(11) 0.6376(9) 0.0134(8) Uiso 1 1 d . . . . .
O16 O 0.4477(6) 0.8710(10) 0.9698(9) 0.0114(8) Uiso 1 1 d . . . . .
 
_geom_special_details
;
 All esds (except the esd in the dihedral angle between two l.s. planes)
 are estimated using the full covariance matrix.  The cell esds are taken
 into account individually in the estimation of esds in distances, angles
 and torsion angles; correlations between esds in cell parameters are only
 used when they are defined by crystal symmetry.  An approximate (isotropic)
 treatment of cell esds is used for estimating esds involving l.s. planes.
;
 
loop_
 _geom_bond_atom_site_label_1
 _geom_bond_atom_site_label_2
 _geom_bond_distance
 _geom_bond_site_symmetry_2
 _geom_bond_publ_flag
Si1 O1 1.661(13) . ?
Si1 O4 1.684(5) . ?
Si1 O5 1.692(7) 2_666 ?
Si1 O5 1.716(9) . ?
Si1 O3 1.720(8) . ?
Si1 O2 1.772(5) . ?
Si1 Si8 2.597(4) . ?
Si1 Si1 2.645(3) 2_666 ?
Si1 Si4 2.671(6) 2_666 ?
O1 Si6 1.608(5) 1_565 ?
O1 Si4 1.988(6) 2_666 ?
Si2 O13 1.558(11) . ?
Si2 O8 1.628(5) 1_556 ?
Si2 O7 1.715(9) 1_556 ?
Si2 O14 1.751(4) . ?
Si2 O6 1.766(10) 1_556 ?
Si2 O8 1.924(7) 2_566 ?
Si2 Si7 2.436(2) . ?
Si2 Si2 2.568(4) 2_567 ?
Si2 Si8 2.625(6) 1_556 ?
O2 Si8 1.700(10) . ?
O2 Si5 1.799(5) 2_666 ?
Si3 O4 1.550(9) . ?
Si3 O11 1.574(11) . ?
Si3 O3 1.620(5) 2_566 ?
Si3 O12 1.643(4) . ?
Si3 Si5 2.767(3) . ?
Si3 Si6 2.824(6) . ?
O3 Si3 1.620(5) 2_566 ?
O3 Si8 1.686(6) . ?
Si4 O10 1.550(10) . ?
Si4 O14 1.589(6) 2_666 ?
Si4 O5 1.614(11) . ?
Si4 O7 1.687(4) . ?
Si4 O1 1.988(6) 2_666 ?
Si4 Si1 2.671(6) 2_666 ?
Si4 Si6 2.739(3) . ?
Si5 O13 1.585(9) . ?
Si5 O16 1.699(7) 1_545 ?
Si5 O12 1.700(10) . ?
Si5 O16 1.733(9) 2_667 ?
Si5 O9 1.765(5) 1_556 ?
Si5 O2 1.799(5) 2_666 ?
Si5 Si8 2.520(3) 2_666 ?
Si5 Si8 2.567(2) 1_546 ?
Si5 Si5 2.617(3) 2_657 ?
O5 Si1 1.692(7) 2_666 ?
Si6 O11 1.544(12) . ?
Si6 O1 1.608(5) 1_545 ?
Si6 O10 1.615(5) . ?
Si6 O15 1.618(9) 2_566 ?
Si6 O15 1.903(5) 1_545 ?
Si6 Si6 2.749(4) 2_556 ?
O6 Si8 1.662(9) . ?
O6 Si7 1.709(7) 1_554 ?
O6 Si2 1.766(10) 1_554 ?
Si7 O15 1.626(8) . ?
Si7 O9 1.674(6) 2_566 ?
Si7 O6 1.709(7) 1_556 ?
Si7 O8 1.722(10) 2_566 ?
Si7 O14 1.776(5) . ?
Si7 O12 1.841(9) 1_565 ?
O7 Si2 1.715(9) 1_554 ?
O7 Si8 1.794(9) . ?
Si8 O16 1.677(5) 1_554 ?
Si8 O9 1.727(7) 1_565 ?
Si8 Si5 2.520(3) 2_666 ?
Si8 Si5 2.567(2) 1_564 ?
Si8 Si2 2.625(6) 1_554 ?
O8 Si2 1.628(5) 1_554 ?
O8 Si7 1.722(10) 2_566 ?
O8 Si2 1.924(7) 2_566 ?
O9 Si7 1.674(6) 2_566 ?
O9 Si8 1.727(7) 1_545 ?
O9 Si5 1.765(5) 1_554 ?
O12 Si7 1.841(8) 1_545 ?
O14 Si4 1.589(6) 2_666 ?
O15 Si6 1.618(9) 2_566 ?
O15 Si6 1.903(5) 1_565 ?
O16 Si8 1.677(5) 1_556 ?
O16 Si5 1.699(7) 1_565 ?
O16 Si5 1.733(9) 2_667 ?
 
loop_
 _geom_angle_atom_site_label_1
 _geom_angle_atom_site_label_2
 _geom_angle_atom_site_label_3
 _geom_angle
 _geom_angle_site_symmetry_1
 _geom_angle_site_symmetry_3
 _geom_angle_publ_flag
O1 Si1 O4 92.1(5) . . ?
O1 Si1 O5 79.0(4) . 2_666 ?
O4 Si1 O5 90.7(3) . 2_666 ?
O1 Si1 O5 155.5(4) . . ?
O4 Si1 O5 97.0(4) . . ?
O5 Si1 O5 78.2(5) 2_666 . ?
O1 Si1 O3 112.8(4) . . ?
O4 Si1 O3 87.0(3) . . ?
O5 Si1 O3 168.0(5) 2_666 . ?
O5 Si1 O3 90.4(4) . . ?
O1 Si1 O2 91.8(4) . . ?
O4 Si1 O2 166.2(4) . . ?
O5 Si1 O2 103.0(3) 2_666 . ?
O5 Si1 O2 84.7(3) . . ?
O3 Si1 O2 79.3(3) . . ?
O1 Si1 Si8 112.6(2) . . ?
O4 Si1 Si8 126.2(4) . . ?
O5 Si1 Si8 139.0(2) 2_666 . ?
O5 Si1 Si8 79.9(3) . . ?
O3 Si1 Si8 39.82(17) . . ?
O2 Si1 Si8 40.5(3) . . ?
O1 Si1 Si1 118.0(3) . 2_666 ?
O4 Si1 Si1 94.97(17) . 2_666 ?
O5 Si1 Si1 39.4(3) 2_666 2_666 ?
O5 Si1 Si1 38.8(3) . 2_666 ?
O3 Si1 Si1 129.1(4) . 2_666 ?
O2 Si1 Si1 94.83(18) . 2_666 ?
Si8 Si1 Si1 111.6(2) . 2_666 ?
O1 Si1 Si4 48.0(2) . 2_666 ?
O4 Si1 Si4 77.9(4) . 2_666 ?
O5 Si1 Si4 35.1(3) 2_666 2_666 ?
O5 Si1 Si4 112.1(3) . 2_666 ?
O3 Si1 Si4 154.1(3) . 2_666 ?
O2 Si1 Si4 114.2(4) . 2_666 ?
Si8 Si1 Si4 152.97(14) . 2_666 ?
Si1 Si1 Si4 73.76(15) 2_666 2_666 ?
Si6 O1 Si1 121.3(6) 1_565 . ?
Si6 O1 Si4 143.7(7) 1_565 2_666 ?
Si1 O1 Si4 93.7(3) . 2_666 ?
O13 Si2 O8 101.1(4) . 1_556 ?
O13 Si2 O7 111.0(4) . 1_556 ?
O8 Si2 O7 96.2(4) 1_556 1_556 ?
O13 Si2 O14 88.1(4) . . ?
O8 Si2 O14 160.4(2) 1_556 . ?
O7 Si2 O14 96.6(3) 1_556 . ?
O13 Si2 O6 162.4(3) . 1_556 ?
O8 Si2 O6 90.6(4) 1_556 1_556 ?
O7 Si2 O6 80.4(4) 1_556 1_556 ?
O14 Si2 O6 77.0(3) . 1_556 ?
O13 Si2 O8 91.0(4) . 2_566 ?
O8 Si2 O8 87.8(3) 1_556 2_566 ?
O7 Si2 O8 156.3(5) 1_556 2_566 ?
O14 Si2 O8 74.7(2) . 2_566 ?
O6 Si2 O8 76.2(4) 1_556 2_566 ?
O13 Si2 Si7 117.9(2) . . ?
O8 Si2 Si7 114.11(18) 1_556 . ?
O7 Si2 Si7 113.8(3) 1_556 . ?
O14 Si2 Si7 46.73(17) . . ?
O6 Si2 Si7 44.6(2) 1_556 . ?
O8 Si2 Si7 44.6(3) 2_566 . ?
O13 Si2 Si2 97.7(4) . 2_567 ?
O8 Si2 Si2 48.5(2) 1_556 2_567 ?
O7 Si2 Si2 138.9(3) 1_556 2_567 ?
O14 Si2 Si2 113.5(2) . 2_567 ?
O6 Si2 Si2 80.1(2) 1_556 2_567 ?
O8 Si2 Si2 39.30(14) 2_566 2_567 ?
Si7 Si2 Si2 74.09(9) . 2_567 ?
O13 Si2 Si8 147.4(3) . 1_556 ?
O8 Si2 Si8 101.0(4) 1_556 1_556 ?
O7 Si2 Si8 42.7(3) 1_556 1_556 ?
O14 Si2 Si8 78.8(4) . 1_556 ?
O6 Si2 Si8 38.6(3) 1_556 1_556 ?
O8 Si2 Si8 113.6(3) 2_566 1_556 ?
Si7 Si2 Si8 73.36(14) . 1_556 ?
Si2 Si2 Si8 114.9(2) 2_567 1_556 ?
Si8 O2 Si1 96.8(3) . . ?
Si8 O2 Si5 92.1(4) . 2_666 ?
Si1 O2 Si5 163.9(3) . 2_666 ?
O4 Si3 O11 103.9(4) . . ?
O4 Si3 O3 115.5(4) . 2_566 ?
O11 Si3 O3 102.2(5) . 2_566 ?
O4 Si3 O12 126.3(5) . . ?
O11 Si3 O12 103.4(4) . . ?
O3 Si3 O12 102.5(2) 2_566 . ?
O4 Si3 Si5 91.5(3) . . ?
O11 Si3 Si5 119.32(19) . . ?
O3 Si3 Si5 123.1(2) 2_566 . ?
O12 Si3 Si5 34.8(4) . . ?
O4 Si3 Si6 126.0(3) . . ?
O11 Si3 Si6 24.8(2) . . ?
O3 Si3 Si6 98.6(4) 2_566 . ?
O12 Si3 Si6 80.4(4) . . ?
Si5 Si3 Si6 103.78(11) . . ?
Si3 O3 Si8 123.2(4) 2_566 . ?
Si3 O3 Si1 136.5(5) 2_566 . ?
Si8 O3 Si1 99.4(3) . . ?
O10 Si4 O14 110.2(5) . 2_666 ?
O10 Si4 O5 119.7(4) . . ?
O14 Si4 O5 124.8(5) 2_666 . ?
O10 Si4 O7 98.7(4) . . ?
O14 Si4 O7 101.5(2) 2_666 . ?
O5 Si4 O7 93.2(4) . . ?
O10 Si4 O1 96.5(3) . 2_666 ?
O14 Si4 O1 81.0(3) 2_666 2_666 ?
O5 Si4 O1 71.8(4) . 2_666 ?
O7 Si4 O1 162.6(5) . 2_666 ?
O10 Si4 Si1 123.9(3) . 2_666 ?
O14 Si4 Si1 95.6(4) 2_666 2_666 ?
O5 Si4 Si1 37.11(18) . 2_666 ?
O7 Si4 Si1 124.5(4) . 2_666 ?
O1 Si4 Si1 38.3(3) 2_666 2_666 ?
O10 Si4 Si6 30.8(3) . . ?
O14 Si4 Si6 135.3(4) 2_666 . ?
O5 Si4 Si6 89.1(2) . . ?
O7 Si4 Si6 105.0(2) . . ?
O1 Si4 Si6 84.09(18) 2_666 . ?
Si1 Si4 Si6 98.29(12) 2_666 . ?
Si3 O4 Si1 126.5(7) . . ?
O13 Si5 O16 169.8(5) . 1_545 ?
O13 Si5 O12 97.8(4) . . ?
O16 Si5 O12 91.9(4) 1_545 . ?
O13 Si5 O16 90.0(5) . 2_667 ?
O16 Si5 O16 80.6(5) 1_545 2_667 ?
O12 Si5 O16 170.6(4) . 2_667 ?
O13 Si5 O9 94.4(3) . 1_556 ?
O16 Si5 O9 82.2(3) 1_545 1_556 ?
O12 Si5 O9 91.7(3) . 1_556 ?
O16 Si5 O9 92.9(3) 2_667 1_556 ?
O13 Si5 O2 89.1(3) . 2_666 ?
O16 Si5 O2 93.8(3) 1_545 2_666 ?
O12 Si5 O2 91.2(4) . 2_666 ?
O16 Si5 O2 83.7(3) 2_667 2_666 ?
O9 Si5 O2 175.12(19) 1_556 2_666 ?
O13 Si5 Si8 86.0(2) . 2_666 ?
O16 Si5 Si8 89.54(19) 1_545 2_666 ?
O12 Si5 Si8 133.5(2) . 2_666 ?
O16 Si5 Si8 41.50(18) 2_667 2_666 ?
O9 Si5 Si8 134.4(3) 1_556 2_666 ?
O2 Si5 Si8 42.4(3) 2_666 2_666 ?
O13 Si5 Si8 136.0(3) . 1_546 ?
O16 Si5 Si8 40.18(18) 1_545 1_546 ?
O12 Si5 Si8 90.7(2) . 1_546 ?
O16 Si5 Si8 87.26(17) 2_667 1_546 ?
O9 Si5 Si8 42.1(2) 1_556 1_546 ?
O2 Si5 Si8 133.9(3) 2_666 1_546 ?
Si8 Si5 Si8 118.09(8) 2_666 1_546 ?
O13 Si5 Si5 129.7(4) . 2_657 ?
O16 Si5 Si5 40.8(3) 1_545 2_657 ?
O12 Si5 Si5 132.5(3) . 2_657 ?
O16 Si5 Si5 39.8(3) 2_667 2_657 ?
O9 Si5 Si5 86.91(16) 1_556 2_657 ?
O2 Si5 Si5 88.24(16) 2_666 2_657 ?
Si8 Si5 Si5 59.93(9) 2_666 2_657 ?
Si8 Si5 Si5 58.16(8) 1_546 2_657 ?
O13 Si5 Si3 67.9(4) . . ?
O16 Si5 Si3 122.3(4) 1_545 . ?
O12 Si5 Si3 33.45(19) . . ?
O16 Si5 Si3 150.2(2) 2_667 . ?
O9 Si5 Si3 107.9(2) 1_556 . ?
O2 Si5 Si3 76.6(2) 2_666 . ?
Si8 Si5 Si3 114.17(8) 2_666 . ?
Si8 Si5 Si3 122.50(15) 1_546 . ?
Si5 Si5 Si3 157.1(3) 2_657 . ?
Si4 O5 Si1 107.8(3) . 2_666 ?
Si4 O5 Si1 146.7(3) . . ?
Si1 O5 Si1 101.8(5) 2_666 . ?
O11 Si6 O1 133.4(6) . 1_545 ?
O11 Si6 O10 95.4(4) . . ?
O1 Si6 O10 91.3(3) 1_545 . ?
O11 Si6 O15 109.3(4) . 2_566 ?
O1 Si6 O15 113.8(5) 1_545 2_566 ?
O10 Si6 O15 103.0(5) . 2_566 ?
O11 Si6 O15 86.2(4) . 1_545 ?
O1 Si6 O15 86.5(2) 1_545 1_545 ?
O10 Si6 O15 177.9(3) . 1_545 ?
O15 Si6 O15 77.7(4) 2_566 1_545 ?
O11 Si6 Si4 69.6(2) . . ?
O1 Si6 Si4 98.8(2) 1_545 . ?
O10 Si6 Si4 29.4(4) . . ?
O15 Si6 Si4 124.0(2) 2_566 . ?
O15 Si6 Si4 151.4(4) 1_545 . ?
O11 Si6 Si6 98.6(2) . 2_556 ?
O1 Si6 Si6 101.3(2) 1_545 2_556 ?
O10 Si6 Si6 145.5(5) . 2_556 ?
O15 Si6 Si6 42.6(2) 2_566 2_556 ?
O15 Si6 Si6 35.1(3) 1_545 2_556 ?
Si4 Si6 Si6 159.53(10) . 2_556 ?
O11 Si6 Si3 25.3(2) . . ?
O1 Si6 Si3 115.6(4) 1_545 . ?
O10 Si6 Si3 116.9(4) . . ?
O15 Si6 Si3 113.7(3) 2_566 . ?
O15 Si6 Si3 64.4(3) 1_545 . ?
Si4 Si6 Si3 88.23(15) . . ?
Si6 Si6 Si3 86.40(16) 2_556 . ?
Si8 O6 Si7 127.7(3) . 1_554 ?
Si8 O6 Si2 99.9(2) . 1_554 ?
Si7 O6 Si2 89.0(5) 1_554 1_554 ?
O15 Si7 O9 94.6(3) . 2_566 ?
O15 Si7 O6 175.4(4) . 1_556 ?
O9 Si7 O6 89.8(3) 2_566 1_556 ?
O15 Si7 O8 94.4(5) . 2_566 ?
O9 Si7 O8 99.1(4) 2_566 2_566 ?
O6 Si7 O8 83.3(4) 1_556 2_566 ?
O15 Si7 O14 97.9(3) . . ?
O9 Si7 O14 167.5(4) 2_566 . ?
O6 Si7 O14 77.8(3) 1_556 . ?
O8 Si7 O14 79.4(3) 2_566 . ?
O15 Si7 O12 83.3(4) . 1_565 ?
O9 Si7 O12 93.2(4) 2_566 1_565 ?
O6 Si7 O12 98.0(4) 1_556 1_565 ?
O8 Si7 O12 167.6(3) 2_566 1_565 ?
O14 Si7 O12 88.9(3) . 1_565 ?
O15 Si7 Si2 129.2(4) . . ?
O9 Si7 Si2 123.92(16) 2_566 . ?
O6 Si7 Si2 46.4(3) 1_556 . ?
O8 Si7 Si2 51.7(2) 2_566 . ?
O14 Si7 Si2 45.88(13) . . ?
O12 Si7 Si2 121.30(18) 1_565 . ?
Si4 O7 Si2 130.3(6) . 1_554 ?
Si4 O7 Si8 126.1(6) . . ?
Si2 O7 Si8 96.8(2) 1_554 . ?
O6 Si8 O16 98.8(4) . 1_554 ?
O6 Si8 O3 90.4(4) . . ?
O16 Si8 O3 170.4(6) 1_554 . ?
O6 Si8 O2 172.7(3) . . ?
O16 Si8 O2 88.5(4) 1_554 . ?
O3 Si8 O2 82.4(4) . . ?
O6 Si8 O9 87.9(4) . 1_565 ?
O16 Si8 O9 84.0(3) 1_554 1_565 ?
O3 Si8 O9 93.5(3) . 1_565 ?
O2 Si8 O9 92.1(4) . 1_565 ?
O6 Si8 O7 81.0(4) . . ?
O16 Si8 O7 88.9(4) 1_554 . ?
O3 Si8 O7 95.4(3) . . ?
O2 Si8 O7 100.1(3) . . ?
O9 Si8 O7 165.8(4) 1_565 . ?
O6 Si8 Si5 141.8(2) . 2_666 ?
O16 Si8 Si5 43.2(3) 1_554 2_666 ?
O3 Si8 Si5 127.8(3) . 2_666 ?
O2 Si8 Si5 45.52(19) . 2_666 ?
O9 Si8 Si5 90.9(2) 1_565 2_666 ?
O7 Si8 Si5 92.40(19) . 2_666 ?
O6 Si8 Si5 92.87(17) . 1_564 ?
O16 Si8 Si5 40.8(2) 1_554 1_564 ?
O3 Si8 Si5 136.4(3) . 1_564 ?
O2 Si8 Si5 92.1(2) . 1_564 ?
O9 Si8 Si5 43.24(18) 1_565 1_564 ?
O7 Si8 Si5 128.1(2) . 1_564 ?
Si5 Si8 Si5 61.91(7) 2_666 1_564 ?
O6 Si8 Si1 130.29(18) . . ?
O16 Si8 Si1 130.6(3) 1_554 . ?
O3 Si8 Si1 40.8(3) . . ?
O2 Si8 Si1 42.64(16) . . ?
O9 Si8 Si1 101.1(3) 1_565 . ?
O7 Si8 Si1 92.9(3) . . ?
Si5 Si8 Si1 87.41(13) 2_666 . ?
Si5 Si8 Si1 126.7(2) 1_564 . ?
O6 Si8 Si2 41.5(3) . 1_554 ?
O16 Si8 Si2 88.2(4) 1_554 1_554 ?
O3 Si8 Si2 100.6(4) . 1_554 ?
O2 Si8 Si2 140.4(3) . 1_554 ?
O9 Si8 Si2 126.7(3) 1_565 1_554 ?
O7 Si8 Si2 40.5(3) . 1_554 ?
Si5 Si8 Si2 117.50(15) 2_666 1_554 ?
Si5 Si8 Si2 110.24(15) 1_564 1_554 ?
Si1 Si8 Si2 122.76(12) . 1_554 ?
Si2 O8 Si7 128.4(6) 1_554 2_566 ?
Si2 O8 Si2 92.2(2) 1_554 2_566 ?
Si7 O8 Si2 83.7(4) 2_566 2_566 ?
Si7 O9 Si8 133.4(3) 2_566 1_545 ?
Si7 O9 Si5 128.2(2) 2_566 1_554 ?
Si8 O9 Si5 94.7(4) 1_545 1_554 ?
Si4 O10 Si6 119.8(7) . . ?
Si6 O11 Si3 129.9(3) . . ?
Si3 O12 Si5 111.8(5) . . ?
Si3 O12 Si7 120.6(5) . 1_545 ?
Si5 O12 Si7 126.3(2) . 1_545 ?
Si2 O13 Si5 144.1(4) . . ?
Si4 O14 Si2 120.7(3) 2_666 . ?
Si4 O14 Si7 151.4(3) 2_666 . ?
Si2 O14 Si7 87.4(2) . . ?
Si6 O15 Si7 124.6(3) 2_566 . ?
Si6 O15 Si6 102.3(4) 2_566 1_565 ?
Si7 O15 Si6 130.9(4) . 1_565 ?
Si8 O16 Si5 99.0(4) 1_556 1_565 ?
Si8 O16 Si5 95.3(4) 1_556 2_667 ?
Si5 O16 Si5 99.4(5) 1_565 2_667 ?
 
_refine_diff_density_max    0.784
_refine_diff_density_min   -0.775
_refine_diff_density_rms    0.188

_shelx_res_file
;

    C:\XCALIB~1\HA3C17~1\Coesite\P2_s0\struct\tmp\sol\test.res created by SHELXL-2014/7

REM P-1 (#2 in standard setting)
TITL Coes_C1_P2_s0 in P-1
CELL 0.28965 6.5175 6.8754 8.4943 69.612 83.289 81.990
ZERR 16.0000 0.0008 0.0012 0.0015 0.016 0.012 0.012
LATT 1
SFAC O SI
DISP        Si    0.00816    0.01070        28.03
DISP        O    -0.00101    0.00082         6.64
UNIT 32 16
MERG 2
SHEL 99999.00 0.65
FMAP 2
GRID
PLAN 20
TEMP 23
SIZE 0.02 0.02 0.005
OMIT  -5   2   3
OMIT -2 -8 2
OMIT 6 1 1
OMIT  4  -7   3
OMIT  5  -4   7
OMIT  1  -7   5
OMIT  0  -2  10
OMIT -2 -3 4
OMIT   5  -1   4
L.S. 10
ACTA 21
WGHT    0.103600
FVAR       2.59764
SI1   2    0.345532    0.650684    0.458491    11.00000    0.01167
O1    1    0.340029    0.850256    0.526837    11.00000    0.01385
SI2   2    0.194985    0.514792    0.995630    11.00000    0.01263
O2    1    0.468094    0.789139    0.261269    11.00000    0.01251
SI3   2    0.098728    0.316796    0.652251    11.00000    0.01228
O3    1    0.151545    0.682770    0.327757    11.00000    0.01143
SI4   2    0.497296    0.314833    0.276861    11.00000    0.01319
O4    1    0.179070    0.530503    0.618850    11.00000    0.01495
SI5   2    0.348377    0.125425    0.917765    11.00000    0.01197
O5    1    0.455843    0.432284    0.414095    11.00000    0.01242
SI6   2    0.194613    0.064212    0.447578    11.00000    0.01301
O6    1    0.091788    0.740699    0.043707    11.00000    0.01184
SI7   2    0.039884    0.861916    0.837400    11.00000    0.01202
O7    1    0.374134    0.514864    0.128340    11.00000    0.01219
SI8   2    0.287699    0.769223    0.139950    11.00000    0.01177
O8    1    0.037494    0.375958    0.141401    11.00000    0.01366
O9    1    0.185328    0.025616    0.101929    11.00000    0.01186
O10   1    0.361503    0.141621    0.288518    11.00000    0.01422
O11   1    0.157609    0.273226    0.481692    11.00000    0.01628
O12   1    0.175504    0.094539    0.795365    11.00000    0.01251
O13   1    0.275239    0.362042    0.897441    11.00000    0.01426
O14   1    0.284385    0.717176    0.820831    11.00000    0.01216
O15   1    0.004055    0.963196    0.637647    11.00000    0.01342
O16   1    0.447674    0.871012    0.969779    11.00000    0.01141
HKLF 4

REM  Coes_C1_P2_s0 in P-1
REM R1 =  0.0628 for     798 Fo > 4sig(Fo)  and  0.0759 for all     968 data
REM     97 parameters refined using      0 restraints

END

WGHT      0.1036      0.0000

REM Highest difference peak  0.784,  deepest hole -0.775,  1-sigma level  0.188
Q1    1   0.1974  0.3246  0.5600  11.00000  0.05    0.78
Q2    1   0.1399  0.4160  0.6160  11.00000  0.05    0.77
Q3    1   0.3466  0.2225  0.8515  11.00000  0.05    0.69
Q4    1   0.1794  0.7598  0.3141  11.00000  0.05    0.65
Q5    1   0.0843  0.8989  0.0379  11.00000  0.05    0.61
Q6    1   0.0471  0.9013  0.9187  11.00000  0.05    0.61
Q7    1   0.3473  0.7491  0.5739  11.00000  0.05    0.60
Q8    1  -0.0085  0.3492  0.0739  11.00000  0.05    0.60
Q9    1   0.0264  0.7630  0.8598  11.00000  0.05    0.59
Q10   1   0.0226  0.7805  0.8968  11.00000  0.05    0.58
Q11   1   0.2092 -0.0331  0.3349  11.00000  0.05    0.56
Q12   1   0.2756  0.4199  0.9993  11.00000  0.05    0.56
Q13   1   0.2591  0.7444  0.4352  11.00000  0.05    0.55
Q14   1   0.1062  0.1774  0.5184  11.00000  0.05    0.54
Q15   1   0.3530  0.4241  0.0646  11.00000  0.05    0.53
Q16   1   0.1774  0.4418  0.8966  11.00000  0.05    0.53
Q17   1   0.3897  0.1418  0.3165  11.00000  0.05    0.53
Q18   1   0.3516  0.9465  0.5015  11.00000  0.05    0.52
Q19   1   0.0514  0.7981  0.7900  11.00000  0.05    0.52
Q20   1   0.2213  0.0229  0.4999  11.00000  0.05    0.52
;
_shelx_res_checksum    3424

_shelx_hkl_file
;
   0  -1   7 501.638 98.9899   1
   0  -1   6 2802.79 212.438   1
   0  -1   5 90.6214 37.6325   1
   0  -1   4 5962.89 250.611   1
   0   1  -3 25063.0 519.037   1
   0  -1   3 24675.2 463.643   1
   0  -1   2 2588.82 128.307   1
   0   1  -2 2679.38 134.529   1
   0   1  -1 42.2469 13.8140   1
   0  -1   1 33.4282 12.1657   1
   0  -2  10 8919.71 515.082   1
   0  -2   9 7757.80 447.528   1
   0  -2   8 334.952 91.3109   1
   0  -2   7 8586.31 415.601   1
   0  -2   6 4807.28 286.978   1
   0  -2   5 4546.56 257.237   1
   0   2  -5 4324.19 284.701   1
   0   2  -4 3375.39 212.352   1
   0  -2   4 3082.64 192.805   1
   0   2  -3 12956.5 379.672   1
   0  -2   3 12519.2 360.888   1
   0  -2   2 321.131 52.5031   1
   0   2  -2 340.577 55.7505   1
   0   2  -1 1613.28 122.367   1
   0  -2   1 1706.35 125.719   1
   0  -2   0 5321.55 305.562   1
   0   2   0 4850.55 249.155   1
   0  -3  12 371.537 125.468   1
   0  -3  11 90.1938 64.8472   1
   0  -3  10-46.4711 48.3897   1
   0  -3   9 5322.60 367.918   1
   0  -3   8 276.324 82.1864   1
   0  -3   7 369.887 88.7565   1
   0   3  -7 295.143 99.6455   1
   0  -3   6 906.495 131.117   1
   0   3  -6 853.104 139.770   1
   0  -3   5 7548.48 349.854   1
   0   3  -5 7941.75 376.375   1
   0  -3   4 1833.56 159.437   1
   0   3  -4 1751.73 167.080   1
   0  -3   3 7717.54 324.427   1
   0   3  -3 7915.15 321.744   1
   0   3  -2 6325.50 267.314   1
   0  -3   2 6772.69 308.299   1
   0  -3   1 3494.31 261.452   1
   0   3  -1 4210.20 232.936   1
   0  -3   0 27.2350 44.1238   1
   0   3   0 67.3967 40.8285   1
   0  -4  14 374.886 154.293   1
   0  -4  13 640.657 179.365   1
   0  -4  12 20.5849 50.9140   1
   0  -4  11 184.379 88.8859   1
   0  -4  10-5.04653 35.5895   1
   0  -4   9 102.757 61.0351   1
   0  -4   8 7003.31 413.355   1
   0   4  -8 6638.50 475.650   1
   0   4  -7 29.3234 41.7921   1
   0  -4   7 59.4817 42.8149   1
   0  -4   6 446.899 96.0849   1
   0   4  -6 526.262 112.622   1
   0   4  -5 5631.97 347.284   1
   0  -4   5 5689.49 327.207   1
   0   4  -4 80.8699 43.2344   1
   0  -4   4 94.2259 50.1593   1
   0   4  -3 387.653 82.2645   1
   0  -4   3 358.796 86.3831   1
   0   4  -2 3665.54 239.942   1
   0  -4   2 3401.33 274.543   1
   0   4  -1 1044.10 134.350   1
   0  -4   1 722.900 154.356   1
   0  -4   0 974.090 218.076   1
   0   4   0 992.812 154.479   1
   0  -5  13 263.114 117.259   1
   0  -5  12 171.272 90.1775   1
   0  -5  11 476.773 131.806   1
   0  -5  10 118.906 68.6466   1
   0  -5   9 663.204 139.235   1
   0   5  -9 601.556 163.080   1
   0   5  -8 3280.60 332.892   1
   0  -5   8 3781.61 314.149   1
   0   5  -7 17.4016 39.3475   1
   0  -5   7-31.2639 39.6523   1
   0   5  -6 680.135 143.057   1
   0  -5   6 726.762 141.694   1
   0  -5   5 840.444 159.783   1
   0   5  -5 793.013 140.677   1
   0  -5   4 1757.00 211.967   1
   0   5  -4 1703.07 196.619   1
   0  -5   3 1134.84 181.031   1
   0   5  -3 1146.42 150.477   1
   0   5  -2 11551.4 497.861   1
   0  -5   2 9908.25 604.407   1
   0  -5   1 221.575 102.386   1
   0   5  -1 247.767 75.5415   1
   0  -6  12 640.192 170.234   1
   0  -6  11 508.657 145.884   1
   0   6 -10 106.590 92.6037   1
   0  -6  10 346.615 117.654   1
   0   6  -9 85.0289 76.2884   1
   0  -6   9-35.2860 52.4623   1
   0  -6   8 859.433 180.072   1
   0   6  -8 1042.75 196.075   1
   0   6  -7 69.4325 62.5645   1
   0  -6   7 102.489 73.9009   1
   0   6  -6 2118.18 258.278   1
   0  -6   6 2257.89 273.786   1
   0  -6   5 930.329 175.520   1
   0   6  -5 942.385 164.022   1
   0   6  -4 2618.05 264.550   1
   0  -6   4 2393.58 292.674   1
   0   6  -3 7799.61 427.789   1
   0  -6   3 7349.34 568.894   1
   0  -6   2 180.098 109.773   1
   0   6  -2 298.082 94.0551   1
   0   6  -1 1075.20 164.428   1
   0  -6   1 1014.46 251.479   1
   0  -7  10-15.6910 59.7625   1
   0   7 -10 124.234 99.6812   1
   0  -7   9 2274.14 323.762   1
   0   7  -9 2256.60 319.943   1
   0   7  -8 1271.90 234.694   1
   0  -7   8 808.801 185.013   1
   0  -7   7 2740.52 328.752   1
   0   7  -7 2539.79 324.056   1
   0  -7   6-62.9389 68.1163   1
   0   7  -6-40.8966 54.4058   1
   0  -7   5 489.927 151.987   1
   0   7  -5 495.240 132.209   1
   0   7  -4-47.1620 50.3137   1
   0  -7   4 45.0236 76.8876   1
   0   7  -3 617.176 133.049   1
   0  -7   3 518.140 189.979   1
   0  -7   2-98.7018 101.178   1
   0   7  -2-19.5928 41.8616   1
   0   7  -1 1306.74 192.800   1
   0  -7   1 1341.95 354.373   1
   0  -8   9-43.8693 68.9413   1
   0   8  -9 300.681 133.427   1
   0  -8   8 37.4566 70.2287   1
   0   8  -8-20.8651 62.7636   1
   0  -8   7 339.345 143.286   1
   0   8  -7 381.834 140.446   1
   0  -8   6 223.170 125.774   1
   0   8  -6 386.739 133.088   1
   0   8  -5 87.1914 70.9338   1
   0  -8   5 29.4703 83.7527   1
   0   8  -4 1252.44 209.687   1
   0  -8   4 1207.32 304.840   1
   0   8  -3 295.322 101.496   1
   0  -8   3 555.281 208.865   1
   0   8  -2 3716.47 363.007   1
   0  -8   2 3725.27 577.738   1
   0   8  -1 22543.7 836.580   1
   0  -9   7-58.0355 102.357   1
   0   9  -7-24.7632 63.4695   1
   0   9  -6 176.327 101.752   1
   0  -9   6 264.083 165.165   1
   0   9  -5 2252.72 318.167   1
   0  -9   5 2078.39 425.648   1
   0   9  -4 189.724 92.7918   1
   0  -9   4 221.596 158.105   1
   0   9  -3 61.5103 58.1604   1
   0  -9   3 51.1774 125.780   1
   0  -9   2 1076.71 390.786   1
   0   9  -2 1275.17 222.113   1
   0 -10   5 614.952 255.796   1
   0  10  -5 159.758 100.870   1
   0  10  -4 87.1422 72.4136   1
   0 -10   4 327.330 220.527   1
   0  10  -3 62.4321 60.9574   1
   0 -10   3-439.411 287.842   1
   0  10  -2 214.246 99.6456   1
   1 -10   2 1224.30 452.163   1
  -1  10  -2 1118.12 213.930   1
  -1  10  -3 776.552 182.153   1
   1 -10   3 1075.79 375.805   1
   1 -10   4 656.457 270.222   1
  -1  10  -4 301.052 126.465   1
  -1   9  -1 2821.01 346.999   1
   1  -9   2 964.926 336.477   1
  -1   9  -2 1247.63 218.123   1
  -1   9  -3 641.397 158.378   1
   1  -9   3 834.644 276.169   1
   1  -9   4 451.074 215.380   1
  -1   9  -4 306.653 120.936   1
   1  -9   5 1208.01 324.783   1
  -1   9  -5 1378.25 256.413   1
  -1   9  -6 88.9514 82.5443   1
   1  -9   6 94.7300 117.651   1
   1  -9   7 1357.92 307.927   1
  -1   8  -1 149.115 83.1013   1
   1  -8   1 118.807 157.025   1
  -1   8  -2-79.3520 62.5366   1
   1  -8   2 1.85279 80.1990   1
  -1   8  -3-24.4947 44.6475   1
   1  -8   3-94.3674 115.382   1
   1  -8   4 103.300 112.387   1
  -1   8  -4 217.414 98.0929   1
   1  -8   5 53.1098 85.2527   1
  -1   8  -5-91.6764 73.2192   1
  -1   8  -6 90.0711 77.4999   1
   1  -8   6 235.596 125.830   1
  -1   8  -7 2374.51 344.745   1
   1  -8   7 2222.77 346.394   1
  -1   8  -8 153.332 105.126   1
   1  -8   8 80.3831 82.2777   1
  -1   7  -1 86.5928 62.7477   1
   1  -7   1-94.4877 111.279   1
   1  -7   2 117.715 107.840   1
  -1   7  -2 206.214 83.7229   1
   1  -7   3 278.011 140.314   1
  -1   7  -3 180.464 78.3797   1
   1  -7   4 6737.13 558.749   1
  -1   7  -4 6964.02 481.593   1
   1  -7   5 4695.84 454.329   1
  -1   7  -5 3816.12 364.834   1
   1  -7   6 182.865 96.3056   1
  -1   7  -6 71.8574 66.3170   1
  -1   7  -7 791.492 193.758   1
   1  -7   7 913.292 198.459   1
  -1   7  -8 229.507 111.728   1
   1  -7   8-9.85656 53.6742   1
  -1   7  -9 128.104 93.9909   1
   1  -7   9 203.514 115.198   1
   1  -7  10 1338.86 267.827   1
  -1   6   0 25.0536 38.2260   1
   1  -6   0 1117.70 299.811   1
  -1   6  -1 4914.06 371.593   1
   1  -6   1 5885.49 537.138   1
  -1   6  -2 1761.91 210.477   1
   1  -6   2 1334.00 256.822   1
  -1   6  -3 2089.05 228.541   1
   1  -6   3 2006.37 274.392   1
  -1   6  -4 582.859 134.116   1
   1  -6   4 615.067 148.498   1
   1  -6   5 4196.71 373.546   1
  -1   6  -5 4015.11 348.981   1
  -1   6  -6 359.267 115.892   1
   1  -6   6 406.649 130.514   1
   1  -6   7 131.640 81.4715   1
  -1   6  -7 115.782 76.5030   1
  -1   6  -8 472.939 140.310   1
   1  -6   8 354.690 119.496   1
  -1   6  -9 2397.14 332.988   1
   1  -6   9 2966.00 327.684   1
  -1   6 -10 34.1762 73.9133   1
   1  -6  10 250.654 104.601   1
   1  -6  11-83.5266 70.3229   1
  -1   5   0 1012.70 157.176   1
   1  -5   0 922.891 222.060   1
   1  -5   1 8952.76 611.828   1
  -1   5  -1 10321.1 499.899   1
  -1   5  -2 3988.23 286.493   1
   1  -5   2 3894.59 345.698   1
   1  -5   3 8159.90 465.055   1
  -1   5  -3 8156.73 418.885   1
  -1   5  -4 7216.75 412.283   1
   1  -5   4 6935.50 446.240   1
   1  -5   5 128.483 68.6777   1
  -1   5  -5 88.1614 56.1647   1
  -1   5  -6 3191.82 313.334   1
   1  -5   6 3285.33 296.030   1
   1  -5   7 16.8892 35.6768   1
  -1   5  -7 38.8301 48.3672   1
   1  -5   8 1144.67 181.867   1
  -1   5  -8 1109.32 204.137   1
   1  -5   9 315.768 102.499   1
  -1   5  -9 368.526 136.025   1
   1  -5  10 10.0165 38.1811   1
   1  -5  11 524.141 142.124   1
   1  -5  12 93.0995 73.8018   1
   1  -4   0 17119.1 743.073   1
  -1   4   0 14792.9 541.301   1
   1  -4   1 19174.2 729.334   1
  -1   4  -1 19835.8 636.318   1
  -1   4  -2 33.7735 29.1792   1
   1  -4   2 60.3173 41.6695   1
   1  -4   3 3438.89 284.472   1
  -1   4  -3 3606.89 259.655   1
   1  -4   4 1812.72 192.719   1
  -1   4  -4 1719.05 187.282   1
  -1   4  -5 1350.72 181.628   1
   1  -4   5 1176.71 154.933   1
  -1   4  -6 186.375 73.6552   1
   1  -4   6 156.430 62.4372   1
   1  -4   7 33.5529 38.7016   1
  -1   4  -7-45.7400 49.0101   1
  -1   4  -8 77.2266 67.2884   1
   1  -4   8 1.17305 29.4887   1
   1  -4   9 239.133 90.3015   1
   1  -4  10 249.018 96.7682   1
   1  -4  11 1199.79 211.838   1
   1  -4  12 213.821 101.466   1
   1  -4  13-131.227 90.0575   1
   1  -3   0 42472.3 1006.00   1
  -1   3   0 41505.9 794.772   1
   1  -3   1 9733.64 397.618   1
  -1   3  -1 10910.0 391.914   1
   1  -3   2 2008.34 183.948   1
  -1   3  -2 2354.55 174.255   1
  -1   3  -3 789.976 108.794   1
   1  -3   3 757.834 104.365   1
   1  -3   4 3082.17 220.399   1
  -1   3  -4 3383.47 248.297   1
  -1   3  -5 15546.7 552.265   1
   1  -3   5 16528.6 555.981   1
  -1   3  -6 583.779 122.231   1
   1  -3   6 597.937 112.633   1
   1  -3   7 2141.11 218.439   1
  -1   3  -7 1753.40 237.953   1
   1  -3   8-74.4886 50.5767   1
   1  -3   9 1369.03 196.393   1
   1  -3  10 210.245 86.4077   1
   1  -3  11 974.842 185.584   1
   1  -3  12-23.0244 49.0378   1
   1  -2   0 19008.9 530.572   1
  -1   2   0 19441.2 446.279   1
  -1   2  -1 5066.63 205.157   1
   1  -2   1 4586.07 226.406   1
   1  -2   2 6059.27 240.791   1
  -1   2  -2 6085.17 247.603   1
   1  -2   3 144.279 44.1536   1
  -1   2  -3 93.6117 38.5711   1
  -1   2  -4 14389.7 465.420   1
   1  -2   4 13903.2 447.812   1
   1  -2   5 2448.01 203.479   1
  -1   2  -5 2508.06 228.434   1
   1  -2   6 2322.29 214.712   1
   1  -2   7 325.285 89.8681   1
   1  -2   8 180.862 72.3249   1
   1  -2   9 430.493 112.436   1
   1  -2  10 103.953 65.4460   1
   1  -1   0 17.9057 10.9157   1
  -1   1   0 13.0409 9.95242   1
   1  -1   1 14030.8 286.805   1
  -1   1  -1 14589.2 288.099   1
  -1   1  -2 24238.3 447.638   1
   1  -1   2 23730.0 445.451   1
   1  -1   3 108.323 35.4911   1
  -1   1  -3 86.7015 35.3201   1
   1  -1   4 23924.5 546.084   1
   1  -1   5 946.057 119.154   1
   1  -1   6 9185.16 402.847   1
   1  -1   7 327.989 84.5168   1
  -1  -1   7 2345.72 201.248   1
  -1  -1   6 3.58669 18.9064   1
  -1  -1   5 303.663 59.6597   1
  -1  -1   4 15169.1 362.216   1
   1   1  -3 2818.35 164.057   1
  -1  -1   3 2955.67 143.873   1
  -1  -1   2 812.430 59.8806   1
   1   1  -2 923.813 68.6695   1
  -1  -2  11 1761.79 249.172   1
  -1  -2  10 684.182 144.074   1
  -1  -2   9 4068.73 318.041   1
  -1  -2   8 1863.85 199.882   1
  -1  -2   7 220.336 65.8879   1
  -1  -2   6 96.1047 41.5870   1
  -1  -2   5 786.647 99.4216   1
   1   2  -5 769.263 116.757   1
  -1  -2   4 485.537 71.5097   1
   1   2  -4 564.242 82.0340   1
   1   2  -3 404.750 62.2178   1
  -1  -2   3 395.570 57.2227   1
  -1  -2   2 4585.50 210.104   1
   1   2  -2 4985.69 184.932   1
  -1  -2   1 9810.28 361.846   1
   1   2  -1 11410.4 301.868   1
  -1  -3  13 111.166 88.7112   1
  -1  -3  12-14.5895 48.3565   1
  -1  -3  11 412.099 119.697   1
  -1  -3  10 860.953 154.779   1
  -1  -3   9 390.471 98.1598   1
  -1  -3   8 4.86463 25.8249   1
   1   3  -7 343.828 102.561   1
  -1  -3   7 336.255 81.1829   1
   1   3  -6 116.314 54.9371   1
  -1  -3   6 93.6446 43.5988   1
  -1  -3   5 1083.57 122.078   1
   1   3  -5 1146.62 136.310   1
   1   3  -4 239.338 59.8531   1
  -1  -3   4 313.998 64.4525   1
  -1  -3   3 36552.7 749.183   1
   1   3  -3 38575.0 676.004   1
  -1  -3   2 1873.33 168.309   1
   1   3  -2 2145.18 151.705   1
   1   3  -1 489.306 81.8716   1
  -1  -3   1 518.079 105.094   1
  -1  -4  14 125.166 107.750   1
  -1  -4  13-48.1448 69.7652   1
  -1  -4  12 305.688 116.530   1
  -1  -4  11 153.570 79.6018   1
  -1  -4  10 955.158 166.526   1
  -1  -4   9 196.928 75.1219   1
   1   4  -8 2479.28 282.914   1
  -1  -4   8 2662.78 237.360   1
   1   4  -7 2257.16 237.977   1
  -1  -4   7 2317.88 211.486   1
  -1  -4   6 2461.85 210.982   1
   1   4  -6 2517.32 229.721   1
   1   4  -5 18.2075 29.7966   1
  -1  -4   5 12.9016 27.3747   1
   1   4  -4 1687.24 166.187   1
  -1  -4   4 1586.28 182.491   1
  -1  -4   3 39780.6 892.589   1
   1   4  -3 40887.2 762.866   1
   1   4  -2 23956.9 641.998   1
  -1  -4   2 23924.5 813.058   1
  -1  -4   1 1567.04 234.824   1
   1   4  -1 1558.72 167.434   1
  -1  -5  13 76.1357 74.7379   1
  -1  -5  12 200.553 94.9069   1
  -1  -5  11 10.1860 39.8968   1
  -1  -5  10 260.823 91.8347   1
   1   5  -9 111.953 80.1599   1
  -1  -5   9 276.057 89.7432   1
   1   5  -8 311.802 105.076   1
  -1  -5   8 372.240 100.060   1
  -1  -5   7 33.5151 41.4505   1
   1   5  -7 23.6704 39.7784   1
  -1  -5   6 781.521 151.713   1
   1   5  -6 284.427 90.7571   1
  -1  -5   5 3105.84 276.900   1
   1   5  -5 2765.85 247.983   1
   1   5  -4 20.5339 31.9962   1
  -1  -5   4 38.7769 44.4451   1
  -1  -5   3 570.529 140.616   1
   1   5  -3 647.132 110.377   1
  -1  -5   2 5557.34 460.592   1
   1   5  -2 5263.27 350.261   1
   1   5  -1 35136.8 866.914   1
  -1  -5   1 31570.9 1308.91   1
  -1  -6  12 1488.25 252.942   1
  -1  -6  11 24.8252 51.1414   1
   1   6 -10 89.6161 85.6572   1
  -1  -6  10 136.268 80.3804   1
   1   6  -9-73.5289 70.6244   1
  -1  -6   9 26.4234 50.8794   1
   1   6  -8-12.6535 42.9888   1
  -1  -6   8-35.5616 54.6819   1
   1   6  -7 565.401 140.321   1
  -1  -6   7 580.450 139.923   1
  -1  -6   6-13.3068 40.7739   1
   1   6  -6 57.2696 52.1231   1
   1   6  -5 445.621 111.200   1
  -1  -6   5 450.985 128.842   1
   1   6  -4 923.205 152.664   1
  -1  -6   4 957.492 198.226   1
  -1  -6   3 666.812 189.340   1
   1   6  -3 713.036 128.696   1
  -1  -6   2 5197.96 507.766   1
   1   6  -2 4588.83 354.399   1
   1   6  -1 1031.71 162.229   1
  -1  -7  11 881.207 215.670   1
   1   7 -11 457.525 179.499   1
  -1  -7  10 248.141 114.176   1
   1   7 -10 288.854 131.732   1
   1   7  -9 189.940 99.9240   1
  -1  -7   9 320.106 119.226   1
  -1  -7   8 22.0984 51.3901   1
   1   7  -8 119.252 80.9259   1
   1   7  -7 610.331 157.461   1
  -1  -7   7 675.417 168.653   1
  -1  -7   6 3744.35 396.001   1
   1   7  -6 3756.07 355.938   1
   1   7  -5 36.1294 48.9966   1
  -1  -7   5 483.641 164.614   1
  -1  -7   4 935.315 240.928   1
   1   7  -4 835.600 154.848   1
  -1  -7   3 2397.13 373.879   1
   1   7  -3 1807.61 221.101   1
   1   7  -2 26.1982 44.4552   1
  -1  -7   2-19.6026 98.5272   1
   1   7  -1 2895.11 282.013   1
  -1  -8  10 61.6578 74.5684   1
  -1  -8   9 320.831 136.141   1
   1   8  -9 313.270 131.467   1
  -1  -8   8 199.882 113.033   1
   1   8  -8-34.8759 65.0181   1
   1   8  -7-0.49032 46.3910   1
  -1  -8   7 147.723 106.431   1
  -1  -8   6 60.1914 92.8768   1
   1   8  -6 188.285 94.4486   1
  -1  -8   5 690.345 231.014   1
   1   8  -5 725.090 169.126   1
  -1  -8   4 566.036 209.401   1
   1   8  -4 373.242 112.800   1
  -1  -8   3 2225.83 428.271   1
   1   8  -3 1988.46 246.680   1
   1   8  -2 1490.36 231.410   1
  -1  -9   8-18.8425 85.1231   1
   1   9  -8 158.428 110.226   1
  -1  -9   7-53.2140 102.221   1
   1   9  -7-31.1006 63.8239   1
  -1  -9   6 201.184 154.309   1
   1   9  -6 237.987 110.340   1
   1   9  -5 6.38607 46.0415   1
  -1  -9   5 46.4893 104.859   1
  -1  -9   4 309.045 192.339   1
   1   9  -4 348.641 115.541   1
  -1  -9   3-155.699 188.913   1
   1   9  -3 45.5080 51.6455   1
   1   9  -2 225.509 100.248   1
   1  10  -6 364.525 140.346   1
  -1 -10   6 181.908 156.528   1
  -1 -10   5 234.232 191.404   1
   1  10  -5 244.429 114.032   1
   1  10  -4 169.464 88.6146   1
  -1 -10   4 169.276 204.743   1
   1  10  -3 517.408 140.179   1
   1  11  -3 391.653 125.762   1
   2 -10   2 34.2372 158.606   1
  -2  10  -2 55.8682 62.9620   1
   2 -10   3 4088.31 660.371   1
  -2  10  -3 1959.79 294.635   1
   2  -9   1 121.216 178.183   1
  -2   9  -1 100.342 76.7308   1
   2  -9   2 260.319 182.525   1
  -2   9  -2 289.733 110.556   1
   2  -9   3 424.302 209.898   1
  -2   9  -3 107.113 75.6497   1
   2  -9   4 189.349 159.784   1
  -2   9  -4 182.754 101.439   1
   2  -9   5 157.379 142.595   1
  -2   9  -5 108.573 86.0275   1
   2  -9   6 651.349 229.600   1
  -2   8   0 1644.14 238.932   1
   2  -8   1 19.1589 100.135   1
  -2   8  -1 124.944 78.6808   1
   2  -8   2 97.9482 114.018   1
  -2   8  -2 75.2538 60.4440   1
   2  -8   3 827.166 258.379   1
  -2   8  -3 964.705 186.243   1
   2  -8   4 484.014 193.833   1
  -2   8  -4 471.870 144.129   1
   2  -8   5-71.5572 87.0712   1
  -2   8  -5-19.2257 51.3257   1
  -2   8  -6-46.7847 66.6315   1
   2  -8   6 126.829 101.032   1
   2  -8   7 85.5966 85.9874   1
  -2   8  -7-202.866 116.475   1
  -2   7   0 7048.59 461.167   1
   2  -7   0 5889.02 721.327   1
  -2   7  -1 146.926 79.1091   1
   2  -7   1 335.162 156.137   1
  -2   7  -2 374.901 108.894   1
   2  -7   2 414.729 174.689   1
   2  -7   3 3461.55 433.651   1
  -2   7  -3 3313.17 321.467   1
   2  -7   4 142.429 94.6757   1
  -2   7  -4 28.1779 48.5813   1
   2  -7   5-82.5245 75.1118   1
  -2   7  -5-10.2221 43.3289   1
  -2   7  -6 17.0022 49.7930   1
   2  -7   6 103.090 79.5193   1
  -2   7  -7-50.1978 68.3801   1
   2  -7   7 80.7153 77.1546   1
  -2   7  -8 141.754 94.8983   1
   2  -7   8 80.6326 83.3044   1
  -2   7  -9 384.196 149.047   1
   2  -7   9 34.2047 68.0947   1
  -2   6   0 8656.64 476.987   1
   2  -6   0 9074.64 737.621   1
   2  -6   1 379.751 153.859   1
  -2   6  -1 307.877 99.8566   1
  -2   6  -2 2590.01 254.993   1
   2  -6   2 2333.80 327.822   1
   2  -6   3-69.5944 64.7238   1
  -2   6  -3-1.03591 29.7672   1
  -2   6  -4 890.995 166.438   1
   2  -6   4 832.361 172.715   1
   2  -6   5 2174.20 287.162   1
  -2   6  -5 2129.83 266.098   1
  -2   6  -6 332.028 117.441   1
   2  -6   6 249.685 110.337   1
   2  -6   7 2038.13 282.388   1
  -2   6  -7 2012.53 283.631   1
   2  -6   8 918.702 189.132   1
  -2   6  -8 899.673 196.871   1
  -2   6  -9 241.368 120.638   1
   2  -6   9 366.680 124.144   1
   2  -6  10 412.387 133.502   1
  -2   6 -10 406.775 166.311   1
  -2   5   1 8373.54 485.472   1
  -2   5   0 816.373 137.462   1
   2  -5   0 984.887 206.825   1
  -2   5  -1 327.475 91.0697   1
   2  -5   1 309.770 118.324   1
  -2   5  -2 396.178 94.0836   1
   2  -5   2 397.455 113.436   1
   2  -5   3 1324.20 192.140   1
  -2   5  -3 1313.77 180.013   1
  -2   5  -4-44.4789 44.1146   1
   2  -5   4 10.6956 40.7691   1
   2  -5   5-93.6584 61.4740   1
  -2   5  -5 480.935 121.453   1
   2  -5   6-81.9752 56.8100   1
  -2   5  -6 35.2983 49.2340   1
   2  -5   7 107.245 63.2362   1
  -2   5  -7 146.354 78.7531   1
   2  -5   8 80.2505 59.2103   1
  -2   5  -8 49.9756 62.2303   1
   2  -5   9 58.7978 55.0044   1
  -2   5  -9 53.6796 71.7757   1
   2  -5  10 618.490 152.016   1
   2  -5  11-81.6975 68.4553   1
  -2   4   1 19304.6 692.186   1
   2  -4  -1 17410.3 949.053   1
  -2   4   0 676.778 113.265   1
   2  -4   0 432.076 127.862   1
   2  -4   1 10285.4 495.606   1
  -2   4  -1 11131.3 445.219   1
   2  -4   2 1597.39 185.027   1
  -2   4  -2 1468.62 160.970   1
  -2   4  -3 4.52021 23.1604   1
   2  -4   3 78.1165 49.6718   1
  -2   4  -4 9637.65 464.057   1
   2  -4   4 9739.93 455.773   1
  -2   4  -5-9.27759 33.3346   1
   2  -4   5 40.2679 38.4774   1
   2  -4   6 1745.29 206.397   1
  -2   4  -6 1838.90 224.589   1
   2  -4   7 12131.0 575.096   1
  -2   4  -7 11320.2 603.564   1
   2  -4   8 600.625 137.948   1
  -2   4  -8 947.166 198.539   1
   2  -4   9 943.517 180.329   1
   2  -4  10 80.7698 64.2882   1
   2  -4  11 2116.06 286.036   1
   2  -4  12 62.1231 65.2737   1
   2  -3  -1 900.254 183.101   1
  -2   3   1 429.638 95.1115   1
  -2   3   0 41.9005 29.6438   1
   2  -3   0 51.4173 42.3140   1
   2  -3   1 610.466 98.9453   1
  -2   3  -1 621.784 90.6947   1
   2  -3   2 312.493 73.0158   1
  -2   3  -2 344.787 74.3158   1
  -2   3  -3 10692.5 425.289   1
   2  -3   3 10831.8 412.824   1
  -2   3  -4 4193.23 295.498   1
   2  -3   4 4337.90 284.211   1
  -2   3  -5 2169.02 217.415   1
   2  -3   5 2238.11 221.375   1
   2  -3   6 3483.75 282.559   1
  -2   3  -6 3028.91 286.511   1
  -2   3  -7 1469.29 227.743   1
   2  -3   7 1587.04 199.745   1
   2  -3   8 1099.65 175.767   1
   2  -3   9 211.137 85.3880   1
   2  -3  10 669.276 151.647   1
   2  -3  11 98.7345 69.3628   1
   2  -3  12 434.452 136.276   1
  -2   2   1 950.826 117.061   1
   2  -2  -1 928.183 143.336   1
  -2   2   0 8374.92 302.791   1
   2  -2   0 8152.20 313.344   1
   2  -2   1 2845.51 173.439   1
  -2   2  -1 3141.11 179.057   1
   2  -2   2 6119.18 264.926   1
  -2   2  -2 6630.41 283.191   1
  -2   2  -3 3633.98 235.538   1
   2  -2   3 3716.50 229.750   1
   2  -2   4 1259.16 146.043   1
  -2   2  -4 1299.13 149.732   1
  -2   2  -5 514.058 111.185   1
   2  -2   5 609.819 110.133   1
   2  -2   6 13981.9 556.246   1
   2  -2   7 419.136 106.578   1
   2  -2   8 907.843 159.372   1
   2  -2   9 86.2257 59.2138   1
   2  -1  -1 16888.5 436.368   1
  -2   1   1 17502.7 352.752   1
   2  -1   0 7709.79 223.319   1
  -2   1   0 8121.75 208.931   1
  -2   1  -1 112.975 30.3548   1
   2  -1   1 87.5928 26.8697   1
   2  -1   2 34705.7 598.965   1
  -2   1  -2 34761.9 584.118   1
   2  -1   3 21641.1 531.032   1
  -2   1  -3 22030.0 562.806   1
   2  -1   4 1277.08 136.806   1
   2  -1   5 578.278 99.6366   1
   2  -1   6 5613.75 325.436   1
   2  -1   7 85.3526 48.4025   1
   2   0   1 6106.71 202.447   1
  -2  -1   8 123.814 54.2324   1
  -2  -1   7 182.870 56.7914   1
  -2  -1   6 2625.97 178.713   1
  -2  -1   5 3538.96 180.740   1
  -2  -1   4 149.043 33.6110   1
  -2  -1   3 131027. 795.203   1
  -2  -2  11 1333.63 218.153   1
  -2  -2  10 897.271 161.297   1
  -2  -2   9 135.240 62.0527   1
  -2  -2   8 589.970 106.878   1
  -2  -2   7 167.452 53.9114   1
  -2  -2   6 4491.47 237.322   1
  -2  -2   5 15574.6 396.976   1
  -2  -2   4 15433.4 362.076   1
   2   2  -4 16319.0 401.984   1
   2   2  -3 10369.7 279.068   1
  -2  -2   3 9592.55 268.911   1
  -2  -2   2 335.795 56.6118   1
   2   2  -2 377.847 46.1332   1
   2   2  -1 884.081 96.3968   1
  -2  -3  13 591.258 178.955   1
  -2  -3  12 211.621 98.7619   1
  -2  -3  11 205.148 85.7137   1
  -2  -3  10 654.302 130.714   1
  -2  -3   9 1734.64 192.840   1
  -2  -3   8 10790.0 448.921   1
  -2  -3   7 81.6880 41.6769   1
   2   3  -6 1709.43 179.088   1
  -2  -3   6 1768.54 155.211   1
   2   3  -5 3509.12 221.531   1
  -2  -3   5 3432.08 202.797   1
  -2  -3   4 2500.07 184.631   1
   2   3  -4 2266.54 165.565   1
  -2  -3   3 3487.09 215.664   1
   2   3  -3 3718.65 194.908   1
   2   3  -2 1293.21 123.177   1
  -2  -3   2 1099.05 152.309   1
   2   3  -1 8283.15 356.347   1
  -2  -4  15-329.356 204.135   1
  -2  -4  14 8826.73 745.313   1
  -2  -4  13 125.735 92.2483   1
  -2  -4  12 65.5973 63.8074   1
  -2  -4  11 30.7249 46.2288   1
  -2  -4  10 130.145 63.9553   1
  -2  -4   9 43.1699 39.3855   1
   2   4  -8 24.8383 46.7361   1
  -2  -4   8 91.3947 47.6870   1
  -2  -4   7 986.051 133.114   1
   2   4  -7 870.042 144.214   1
  -2  -4   6 5035.23 301.656   1
   2   4  -6 5892.48 331.721   1
   2   4  -5 216.134 64.9056   1
  -2  -4   5 292.730 81.8378   1
   2   4  -4 1354.93 141.948   1
  -2  -4   4 1416.84 162.925   1
   2   4  -3 4516.76 243.285   1
  -2  -4   3 4298.42 325.157   1
  -2  -4   2 12209.2 581.790   1
   2   4  -2 11568.2 432.778   1
   2   4  -1 63.2964 43.0096   1
  -2  -5  14 565.297 186.118   1
  -2  -5  12 56.8689 59.0939   1
  -2  -5  11 296.518 99.6280   1
  -2  -5  10 149.936 70.6460   1
  -2  -5   9 1192.10 173.986   1
   2   5  -9 860.820 181.899   1
  -2  -5   8 23.6393 38.7543   1
   2   5  -8-35.3526 47.9559   1
  -2  -5   7 1662.25 215.983   1
   2   5  -7 1521.76 192.850   1
  -2  -5   6 2558.29 247.717   1
   2   5  -6 2326.45 236.709   1
   2   5  -5-44.6820 38.8558   1
  -2  -5   5 1.12377 30.8868   1
  -2  -5   4 2803.06 287.138   1
   2   5  -4 2949.69 236.513   1
  -2  -5   3-223.242 104.539   1
   2   5  -3 99.1797 46.4973   1
  -2  -5   2 1294.09 251.987   1
   2   5  -2 1492.26 170.446   1
   2   5  -1 5334.70 348.504   1
  -2  -6  13 542.354 170.034   1
  -2  -6  12 729.468 181.817   1
  -2  -6  11-24.0924 53.0492   1
   2   6 -10-123.963 92.0190   1
  -2  -6  10-17.4220 49.8210   1
   2   6  -9 203.424 96.8876   1
  -2  -6   9 299.905 109.489   1
   2   6  -8 32.6562 48.2079   1
  -2  -6   8 19.6508 43.3101   1
  -2  -6   7 1031.03 176.920   1
   2   6  -7 1017.37 177.625   1
   2   6  -6 1792.48 220.232   1
  -2  -6   6 1771.66 241.213   1
   2   6  -5 2795.25 260.975   1
  -2  -6   5 2675.31 315.536   1
  -2  -6   4-171.718 104.562   1
   2   6  -4 41.3655 40.0274   1
   2   6  -3 805.149 134.600   1
  -2  -6   3 916.927 212.500   1
   2   6  -2 1626.38 193.217   1
  -2  -6   2 1547.80 339.614   1
  -2  -7  12 33.4567 66.3309   1
  -2  -7  11-115.387 82.4478   1
  -2  -7  10 95.8113 73.1589   1
   2   7 -10-213.511 112.850   1
   2   7  -9 204.145 98.6113   1
  -2  -7   9 144.014 83.7064   1
   2   7  -8 36.1173 54.6440   1
  -2  -7   8 122.583 81.7281   1
  -2  -7   7 2306.47 303.674   1
   2   7  -7 2357.97 290.384   1
  -2  -7   6 386.414 145.434   1
   2   7  -6 390.146 116.018   1
   2   7  -5 6969.61 455.650   1
  -2  -7   5 5672.14 556.896   1
   2   7  -4 941.710 157.727   1
  -2  -7   4 1014.51 244.601   1
   2   7  -3 390.204 104.658   1
  -2  -7   3 271.334 161.270   1
   2   7  -2 31.2778 40.9724   1
  -2  -8  11 1271.78 254.222   1
  -2  -8  10 1138.44 238.585   1
   2   8 -10 1282.16 260.970   1
  -2  -8   9 26.2077 62.9776   1
   2   8  -9-13.2562 54.2459   1
  -2  -8   8 744.098 202.320   1
   2   8  -8 911.841 205.158   1
  -2  -8   7-1.43255 69.4424   1
   2   8  -7 22.3526 53.4687   1
   2   8  -6 2766.66 315.957   1
  -2  -8   6 2628.17 419.406   1
  -2  -8   5 447.230 185.748   1
   2   8  -5 124.328 75.6318   1
  -2  -8   4 987.784 283.973   1
   2   8  -4 798.019 156.031   1
   2   8  -3 941.133 169.209   1
  -2  -8   3 1041.47 348.526   1
   2   8  -2 345279. 3194.87   1
  -2  -9   9-185.655 134.930   1
   2   9  -8 25011.9 1138.66   1
  -2  -9   8 45933.7 1782.74   1
   2   9  -7-2.39705 49.2993   1
  -2  -9   7 154.146 134.770   1
   2   9  -6 135.424 85.6001   1
  -2  -9   6-187.138 142.109   1
   2   9  -5-53.2291 60.6771   1
  -2  -9   5 276.157 180.185   1
  -2  -9   4 1118.39 373.828   1
   2   9  -4 1166.42 196.898   1
   2   9  -3 2747.51 295.516   1
   2   9  -2 816.197 168.119   1
   2  10  -7 760.204 200.340   1
  -2 -10   7 486.610 216.599   1
  -2 -10   6 641.870 270.297   1
   2  10  -6 1054.17 221.324   1
   2  10  -5 1048.84 211.456   1
  -2 -10   5 803.459 339.262   1
   2  10  -4 178.724 86.4859   1
   2  10  -3 367.083 114.443   1
   2  11  -4 104.465 71.6203   1
  -3  10  -1 168.323 93.9435   1
   3 -10   1 685.859 356.908   1
  -3  10  -2 660.355 174.366   1
   3 -10   2 1117.95 384.397   1
  -3   9   0 160.530 96.2854   1
  -3   9  -1 62.7530 62.3544   1
   3  -9   1 207.275 188.531   1
   3  -9   2 2074.16 428.903   1
  -3   9  -2 1372.11 234.229   1
   3  -9   3 643.059 258.936   1
  -3   9  -3 864.121 197.403   1
   3  -9   4 482.424 223.031   1
  -3   9  -4 235.926 117.588   1
   3  -9   5 1046.05 303.308   1
   3  -8   0 3293.55 602.145   1
  -3   8   0 3900.60 400.265   1
   3  -8   1 381.707 186.267   1
  -3   8  -1 228.693 96.5133   1
  -3   8  -2 63.0459 58.2864   1
   3  -8   2-34.2249 95.3170   1
   3  -8   3 192.136 139.710   1
  -3   8  -3 60.1196 62.2610   1
  -3   8  -4 1120.34 223.391   1
   3  -8   4 1178.24 279.523   1
  -3   8  -5 1597.47 272.608   1
   3  -8   5 1435.52 295.720   1
   3  -8   6 1306.94 279.036   1
  -3   8  -6 1171.37 247.187   1
   3  -8   7 613.670 190.507   1
  -3   7   0 848.487 177.853   1
   3  -7   0 919.217 272.942   1
   3  -7   1 171.365 123.307   1
  -3   7  -1 165.406 77.6240   1
   3  -7   2 332.436 155.287   1
  -3   7  -2 301.731 100.882   1
  -3   7  -3 4154.93 379.910   1
   3  -7   3 4355.05 468.320   1
   3  -7   4 2773.19 365.040   1
  -3   7  -4 2989.64 333.837   1
   3  -7   5 97.7620 80.7411   1
  -3   7  -5 25.6322 52.0241   1
  -3   7  -6 605.448 170.971   1
   3  -7   6 698.854 185.142   1
  -3   7  -7 63.9414 75.3440   1
   3  -7   7 65.2199 78.8863   1
   3  -7   8 1024.18 247.351   1
  -3   7  -8 789.322 204.562   1
   3  -6  -1 712.796 263.245   1
  -3   6   1 725.926 144.393   1
  -3   6   0 9.86849 36.8846   1
   3  -6   0 281.254 134.565   1
   3  -6   1 288.807 133.133   1
  -3   6  -1 193.401 76.2429   1
  -3   6  -2 3.74119 29.6671   1
   3  -6   2 46.3292 62.3562   1
  -3   6  -3 7945.34 493.056   1
   3  -6   3 7366.13 526.429   1
   3  -6   4 3054.85 334.118   1
  -3   6  -4 2888.17 303.702   1
  -3   6  -5 524.458 141.529   1
   3  -6   5 122.135 83.9750   1
   3  -6   6 3351.58 381.732   1
  -3   6  -6 3628.74 390.167   1
  -3   6  -7 220.925 104.415   1
   3  -6   7 327.254 122.723   1
   3  -6   8 316.015 119.004   1
  -3   6  -8 173.018 99.0731   1
  -3   6  -9-31.5691 68.3242   1
   3  -6   9 73.3112 67.9898   1
   3  -5  -1 1330.80 293.742   1
  -3   5   1 1394.19 184.620   1
  -3   5   0 5271.77 376.360   1
   3  -5   0 4633.30 458.522   1
   3  -5   1 1078.71 199.487   1
  -3   5  -1 1105.99 157.392   1
   3  -5   2 568.574 133.759   1
  -3   5  -2 672.524 126.610   1
   3  -5   3 645.736 142.202   1
  -3   5  -3 560.914 124.134   1
   3  -5   4 1572.02 232.808   1
  -3   5  -4 1644.56 217.415   1
  -3   5  -5 4174.99 366.475   1
   3  -5   5 4865.98 388.145   1
   3  -5   6 3643.37 335.315   1
  -3   5  -6 3516.85 348.839   1
   3  -5   7 631.053 145.249   1
  -3   5  -7 596.538 151.736   1
   3  -5   8 214.716 91.7805   1
  -3   5  -8 95.8811 78.9523   1
  -3   5  -9-18.1883 63.2324   1
   3  -5   9 156.293 82.8215   1
   3  -5  10-10.9284 43.2361   1
   3  -5  11 368.420 129.970   1
  -3   4   1 79.1635 45.5048   1
   3  -4  -1 13.8070 54.4022   1
  -3   4   0 13347.3 530.950   1
   3  -4   0 13914.4 677.403   1
  -3   4  -1 725.362 114.880   1
   3  -4   1 678.474 129.880   1
   3  -4   2 10536.4 506.637   1
  -3   4  -2 11407.1 482.403   1
   3  -4   3 1110.91 165.106   1
  -3   4  -3 1176.96 161.257   1
   3  -4   4 746.863 133.409   1
  -3   4  -4 549.023 120.184   1
  -3   4  -5 3789.58 328.142   1
   3  -4   5 3863.37 309.224   1
  -3   4  -6 3802.37 335.611   1
   3  -4   6 3558.39 311.330   1
   3  -4   7 3576.20 330.761   1
  -3   4  -7 3181.66 338.672   1
  -3   4  -8 19.9553 56.1156   1
   3  -4   8 78.8124 61.2516   1
   3  -4   9 336.025 115.397   1
   3  -4  10 200.818 95.0559   1
   3  -4  11 307.033 118.086   1
   3  -4  12 723.875 180.838   1
  -3   3   2 14918.7 580.980   1
  -3   3   1 307.471 70.5261   1
   3  -3  -1 371.224 105.886   1
  -3   3   0 10832.0 400.440   1
   3  -3   0 10282.7 444.336   1
   3  -3   1 3.48809 22.0419   1
  -3   3  -1 10.7012 20.2409   1
   3  -3   2 678.567 107.325   1
  -3   3  -2 788.300 115.440   1
  -3   3  -3-57.9472 39.6615   1
   3  -3   3 989.061 133.127   1
  -3   3  -4 4812.69 328.000   1
   3  -3   4 5091.35 326.212   1
  -3   3  -5 580.626 120.149   1
   3  -3   5 590.450 121.632   1
   3  -3   6-69.2393 49.6667   1
  -3   3  -6 34.5001 45.5567   1
   3  -3   7 525.778 123.397   1
  -3   3  -7 498.108 143.787   1
   3  -3   8 540.527 131.148   1
   3  -3   9 1201.54 200.324   1
   3  -3  10 342.704 115.190   1
   3  -3  11 70.4777 63.6944   1
  -3   2   2 610.520 103.025   1
   3  -2  -1 4439.93 303.130   1
  -3   2   1 5671.75 249.460   1
   3  -2   0 19930.2 486.965   1
  -3   2   0 19559.6 439.679   1
   3  -2   1 92.4050 34.8859   1
  -3   2  -1 120.943 39.8491   1
  -3   2  -2 16446.8 482.284   1
   3  -2   2 16106.1 468.118   1
  -3   2  -3 915.124 123.516   1
   3  -2   3 1013.01 129.046   1
  -3   2  -4 1141.87 149.409   1
   3  -2   4 1058.52 143.280   1
  -3   2  -5 181.636 73.4188   1
   3  -2   5 127.088 57.2578   1
   3  -2   6 5836.54 377.348   1
   3  -2   7 144.707 69.1408   1
   3  -2   8 545.311 131.440   1
   3  -2   9 309.661 104.690   1
  -3   1   2 11695.1 347.678   1
  -3   1   1 17081.4 321.097   1
   3  -1  -1 15933.7 419.478   1
   3  -1   0 5888.70 201.718   1
  -3   1   0 6084.69 206.899   1
   3  -1   1 2969.70 166.195   1
  -3   1  -1 3272.35 179.164   1
   3  -1   2 151.282 44.8773   1
  -3   1  -2 146.875 43.2731   1
  -3   1  -3 17044.8 531.896   1
   3  -1   3 16184.8 499.429   1
   3  -1   4 10980.6 427.079   1
   3  -1   5 2647.54 221.779   1
   3  -1   6 6488.40 365.772   1
   3  -1   7 194.659 70.6644   1
  -3   0   0 1232.83 86.9036   1
   3   0   0 1151.59 77.3943   1
   3   0   1 4245.64 179.441   1
   3   0   2 102.153 35.6944   1
   3   0   3 19382.8 526.882   1
  -3  -1   9 3154.48 266.923   1
  -3  -1   8 54.6630 38.9091   1
  -3  -1   7 98.6139 40.9650   1
  -3  -1   6 7629.80 276.115   1
  -3  -1   5 2954.24 148.256   1
  -3  -1   4 7975.75 206.504   1
  -3  -2  12-102.062 88.8535   1
  -3  -2  11 76.8750 65.9936   1
  -3  -2  10 2041.10 229.902   1
  -3  -2   9 8.04619 29.1630   1
  -3  -2   8 843.971 118.012   1
  -3  -2   7 717.938 97.4716   1
  -3  -2   6 52.8122 27.5878   1
  -3  -2   5 2529.77 147.009   1
  -3  -2   4 3093.38 147.333   1
   3   2  -4 3104.47 164.676   1
   3   2  -3 175.130 34.2082   1
  -3  -2   3 155.865 37.7617   1
   3   2  -2 19877.6 302.710   1
  -3  -3  14 23.3999 101.269   1
  -3  -3  13 77.0956 86.6147   1
  -3  -3  12 1984.33 271.524   1
  -3  -3  11 443.622 117.330   1
  -3  -3  10 400.354 100.704   1
  -3  -3   9 2138.11 205.433   1
  -3  -3   8 3967.18 252.131   1
  -3  -3   7 708.145 97.9985   1
  -3  -3   6 908.765 103.961   1
   3   3  -6 721.749 113.013   1
  -3  -3   5 691.941 96.1176   1
   3   3  -5 861.411 103.071   1
   3   3  -4 1588.69 129.252   1
  -3  -3   4 1742.49 148.297   1
  -3  -3   3 5437.10 316.778   1
   3   3  -3 6437.52 234.448   1
   3   3  -2 36572.6 599.864   1
  -3  -4  14 13.7273 73.0473   1
  -3  -4  13-44.6397 64.5018   1
  -3  -4  12 611.254 143.253   1
  -3  -4  11 1692.05 208.868   1
  -3  -4  10 182.835 68.2278   1
  -3  -4   9 13.1290 28.8090   1
  -3  -4   8 26.6241 31.4443   1
  -3  -4   7 1386.02 158.598   1
   3   4  -7 1163.64 157.983   1
  -3  -4   6 6565.94 359.294   1
   3   4  -6 6923.88 337.750   1
  -3  -4   5 1607.05 169.319   1
   3   4  -5 1482.11 152.886   1
   3   4  -4 93.6494 39.3371   1
  -3  -4   4 35.7085 42.5842   1
   3   4  -3-7.57733 19.0213   1
  -3  -4   3 4.17543 39.1651   1
   3   4  -2 154.274 49.7863   1
  -3  -5  14 312.545 137.399   1
  -3  -5  13-26.8270 55.5992   1
  -3  -5  12 91.2457 65.9054   1
  -3  -5  11 155.898 73.3828   1
  -3  -5  10 443.443 111.815   1
  -3  -5   9 10.1267 36.4085   1
  -3  -5   8 513.738 120.044   1
   3   5  -8 427.289 111.976   1
  -3  -5   7 49.4418 44.2802   1
   3   5  -7 36.4211 40.0451   1
  -3  -5   6 1797.10 207.747   1
   3   5  -6 1877.49 203.118   1
   3   5  -5 1765.11 180.903   1
  -3  -5   5 1674.18 218.312   1
  -3  -5   4 7655.81 533.241   1
   3   5  -4 9131.11 393.786   1
   3   5  -3 5192.26 293.453   1
  -3  -5   3 5378.66 479.270   1
   3   5  -2 1441.84 159.798   1
  -3  -6  13 41.6846 70.7690   1
  -3  -6  12-34.3827 62.2132   1
  -3  -6  11 1063.26 202.471   1
  -3  -6  10 45.6801 53.8894   1
  -3  -6   9 453.992 118.173   1
   3   6  -9 260.677 102.931   1
  -3  -6   8 266.299 93.3658   1
   3   6  -8 71.2946 56.9358   1
   3   6  -7 5144.39 373.349   1
  -3  -6   7 5001.60 391.162   1
   3   6  -6 1217.54 175.070   1
  -3  -6   6 1334.75 221.415   1
  -3  -6   5 355.185 137.134   1
   3   6  -5 294.540 85.6002   1
  -3  -6   4 3142.80 375.144   1
   3   6  -4 2730.14 235.034   1
   3   6  -3 1201.54 162.810   1
  -3  -6   3 1539.89 331.224   1
   3   6  -2 2524.30 228.294   1
  -3  -7  12 87.6707 74.2699   1
  -3  -7  11 39.7588 56.9973   1
  -3  -7  10 198.847 94.2955   1
   3   7 -10 97.2567 83.8163   1
  -3  -7   9-1.83908 44.6325   1
   3   7  -9 181.625 92.0065   1
  -3  -7   8 399.645 130.361   1
   3   7  -8 496.344 132.744   1
   3   7  -7 449.008 127.404   1
  -3  -7   7 408.374 148.157   1
  -3  -7   6-184.422 118.573   1
   3   7  -6-61.5538 54.9169   1
   3   7  -5 109.027 64.6728   1
  -3  -7   5 320.343 144.079   1
   3   7  -4 248.008 82.1103   1
  -3  -7   4 242.402 153.986   1
   3   7  -3 181.712 74.3390   1
   3   7  -2 678.119 127.312   1
  -3  -8  11 15.7235 58.7383   1
   3   8 -11-84.9506 95.9260   1
   3   8 -10 459.645 157.032   1
  -3  -8  10 633.964 178.212   1
  -3  -8   9 332.935 143.588   1
   3   8  -9 294.134 118.166   1
   3   8  -8 250.703 110.248   1
  -3  -8   8 116.408 103.284   1
  -3  -8   7 857.846 238.299   1
   3   8  -7 1214.78 215.662   1
   3   8  -6 184.252 87.5981   1
  -3  -8   6 825.429 231.174   1
  -3  -8   5 900.533 269.344   1
   3   8  -5 1288.53 205.249   1
  -3  -8   4 1089.63 347.027   1
   3   8  -4 1271.73 188.444   1
   3   8  -3 200.975 81.6975   1
   3   8  -2 1270.96 180.220   1
  -3  -9  10 684.976 219.325   1
  -3  -9   9-11.3416 81.1814   1
   3   9  -9 11.6826 57.1878   1
   3   9  -8 64.5037 77.0745   1
  -3  -9   8 17.6337 82.8588   1
   3   9  -7 47.3674 64.8496   1
  -3  -9   7-39.8628 92.4302   1
  -3  -9   6 53.5899 115.733   1
   3   9  -6 178.861 92.0046   1
  -3  -9   5 377.968 235.022   1
   3   9  -5 187.335 89.9321   1
   3   9  -4 587.754 136.292   1
   3   9  -3 1868.11 238.663   1
  -3 -10   8 128.411 129.048   1
   3  10  -7 101.378 84.6372   1
  -3 -10   7 350.726 205.240   1
   3  10  -6 98.3509 77.5528   1
  -3 -10   6-313.833 229.719   1
   3  10  -5 103.124 73.8576   1
   3  10  -4 338.965 108.942   1
   3  10  -3 0.17848 32.4138   1
   3  11  -5 69.4430 65.8736   1
   3  11  -4 228.165 93.0622   1
  -4  10  -1 207.958 103.168   1
   4 -10   1-195.725 221.620   1
  -4   9   0 2.18874 41.5484   1
   4  -9   0 71.0107 173.356   1
  -4   9  -1 103.688 74.0235   1
   4  -9   1 193.519 174.328   1
  -4   9  -2 302.616 118.116   1
   4  -9   2 436.337 215.384   1
   4  -9   3 495.216 237.332   1
  -4   9  -3 370.273 140.274   1
   4  -9   4 2040.93 436.824   1
  -4   8   1 6.86812 42.0288   1
   4  -8   0 1011.37 326.547   1
  -4   8   0 994.280 197.988   1
  -4   8  -1 139.938 78.0892   1
   4  -8   1 220.110 150.357   1
  -4   8  -2 652.886 158.491   1
   4  -8   2 772.538 260.862   1
  -4   8  -3 579.798 162.441   1
   4  -8   3 658.489 232.215   1
  -4   8  -4 154.897 93.6106   1
   4  -8   4 110.034 104.664   1
  -4   8  -5 375.489 143.985   1
   4  -8   5 168.981 118.627   1
   4  -8   6 1848.29 335.769   1
  -4   7   1 4932.03 406.123   1
   4  -7  -1 5835.33 780.140   1
   4  -7   0-16.1595 83.3636   1
  -4   7   0 68.1558 58.9146   1
   4  -7   1 1966.13 368.703   1
  -4   7  -1 2447.50 274.191   1
  -4   7  -2 504.872 133.278   1
   4  -7   2 529.783 189.881   1
   4  -7   3 203070. 3160.13   1
  -4   7  -3 189715. 2696.74   1
   4  -7   4 247.239 120.721   1
  -4   7  -4 256.693 107.684   1
   4  -7   5 28.7522 60.7996   1
  -4   7  -5-38.3925 60.0228   1
  -4   7  -6 182.958 107.432   1
   4  -7   6 186.540 109.731   1
  -4   7  -7 206.332 114.399   1
   4  -7   7 239.896 131.500   1
   4  -6  -1 2062.79 402.466   1
  -4   6   1 2223.49 255.287   1
   4  -6   0 3902.73 464.509   1
  -4   6   0 3333.56 309.254   1
  -4   6  -1 30.2058 39.9476   1
   4  -6   1-74.8307 83.9729   1
   4  -6   2 2476.34 319.038   1
  -4   6  -2 2583.90 279.279   1
   4  -6   3 1341.10 229.744   1
  -4   6  -3 1467.63 220.657   1
   4  -6   4 484.477 143.043   1
  -4   6  -4 753.748 166.930   1
  -4   6  -5 233.986 103.518   1
   4  -6   5 181.727 103.075   1
   4  -6   6 52.9160 67.4299   1
  -4   6  -6 69.9702 70.6291   1
   4  -6   7 210.076 104.806   1
  -4   6  -7 110.682 82.8144   1
   4  -6   8 139.701 88.5035   1
  -4   6  -8 82.1647 80.1229   1
   4  -6   9 1133.01 228.484   1
  -4   5   2 480.562 114.189   1
   4  -5  -1 1503.27 285.036   1
  -4   5   1 1446.59 192.854   1
   4  -5   0 37.9357 67.6253   1
  -4   5   0 93.6785 53.3305   1
   4  -5   1 3746.58 354.440   1
  -4   5  -1 3848.74 296.601   1
   4  -5   2 173.792 79.6458   1
  -4   5  -2 229.678 82.7224   1
  -4   5  -3 452.222 115.072   1
   4  -5   3 497.481 133.818   1
   4  -5   4-20.8638 45.9858   1
  -4   5  -4 9.21058 37.3513   1
   4  -5   5 1456.52 220.272   1
  -4   5  -5 1128.68 205.417   1
   4  -5   6 4372.36 383.371   1
  -4   5  -6 3761.89 370.750   1
   4  -5   7 1788.44 252.767   1
  -4   5  -7 1491.43 246.451   1
   4  -5   8 574.958 150.677   1
  -4   5  -8 671.563 185.590   1
  -4   5  -9 22.5720 70.6407   1
   4  -5   9 100.488 73.7077   1
   4  -5  10 147.172 88.6660   1
  -4   4   2 3019.37 255.027   1
   4  -4  -1 5280.40 446.584   1
  -4   4   1 4531.14 317.327   1
  -4   4   0-16.0487 27.7206   1
   4  -4   0 67.0117 59.5422   1
   4  -4   1 1881.99 213.859   1
  -4   4  -1 2000.40 199.220   1
   4  -4   2 11102.7 551.754   1
  -4   4  -2 11613.1 506.015   1
  -4   4  -3 246.958 82.2508   1
   4  -4   3 264.640 86.0002   1
  -4   4  -4 392.235 110.354   1
   4  -4   4 444.491 108.651   1
  -4   4  -5 52.5940 50.8643   1
   4  -4   5 138.669 67.5752   1
  -4   4  -6-5.79846 37.6242   1
   4  -4   6 33.9545 44.5655   1
  -4   4  -7-10.5799 47.0481   1
   4  -4   7-12.0473 39.6341   1
  -4   4  -8 292.357 129.841   1
   4  -4   8 362.636 120.436   1
   4  -4   9 248.606 105.873   1
   4  -4  10 42.5496 58.9868   1
   4  -4  11 186.307 99.8308   1
  -4   3   2 214.076 63.5691   1
  -4   3   1 6172.47 322.978   1
   4  -3  -1 5303.74 406.603   1
  -4   3   0 256.849 63.4160   1
   4  -3   0 215.511 70.1017   1
   4  -3   1 23800.5 701.115   1
  -4   3  -1 24234.4 645.405   1
  -4   3  -2 118.954 51.7999   1
   4  -3   2 86.8982 44.6111   1
  -4   3  -3 3427.36 276.797   1
   4  -3   3 3531.52 262.733   1
  -4   3  -4 25.2693 35.5880   1
   4  -3   4 30.7152 36.4089   1
  -4   3  -5 5676.73 387.264   1
   4  -3   5 5581.79 385.804   1
   4  -3   6 493.581 121.334   1
  -4   3  -6 340.378 112.037   1
   4  -3   7 13.1181 37.0787   1
  -4   3  -7-20.1680 54.4685   1
   4  -3   8 683.044 153.163   1
   4  -3   9 682.686 159.166   1
   4  -3  10 2366.93 301.017   1
   4  -3  11-24.4362 50.3974   1
  -4   2   2 369.611 66.7706   1
  -4   2   1-14.3153 18.2005   1
   4  -2  -1-0.43448 27.3997   1
   4  -2   0 2866.42 201.018   1
  -4   2   0 3095.98 192.907   1
   4  -2   1 15498.6 442.154   1
  -4   2  -1 15317.4 456.841   1
  -4   2  -2 48654.8 901.927   1
   4  -2   2 47121.8 850.751   1
  -4   2  -3 36889.6 809.841   1
   4  -2   3 37210.8 824.642   1
   4  -2   4 871.455 136.827   1
  -4   2  -4 706.967 128.315   1
  -4   2  -5 443.419 117.557   1
   4  -2   5 101.785 55.3174   1
   4  -2   6 722.619 140.675   1
   4  -2   7 5945.56 417.875   1
   4  -2   8 513.990 132.386   1
   4  -2   9 170.183 84.9317   1
  -4   1   3 814.920 95.0947   1
  -4   1   2 622.482 69.9314   1
   4  -1  -1 15383.4 391.463   1
  -4   1   1 15828.7 336.295   1
   4  -1   0 2431.15 140.197   1
  -4   1   0 2705.55 155.230   1
  -4   1  -1 8307.55 296.303   1
   4  -1   1 7699.70 291.110   1
  -4   1  -2 1898.48 165.037   1
   4  -1   2 1838.77 159.744   1
   4  -1   3 47573.1 907.083   1
  -4   1  -3 46783.9 955.171   1
   4  -1   4 2254.36 207.998   1
   4  -1   5 706.699 122.029   1
   4  -1   6 290.389 83.7724   1
   4  -1   7 60.7680 45.9140   1
   4   0  -1 0.04445 7.90519   1
  -4   0   1-16.4410 12.1059   1
   4   0   0 116.900 29.2746   1
   4   0   1 17193.3 393.938   1
   4   0   2 14068.7 402.154   1
   4   0   3 344.845 72.4195   1
  -4  -1  10 2286.64 267.199   1
  -4  -1   9 452.187 103.119   1
  -4  -1   8 33.5625 32.9150   1
  -4  -1   7 2633.47 172.612   1
  -4  -1   6 14285.6 344.891   1
  -4  -1   5 253.686 38.6351   1
  -4  -2  13 2168.91 413.354   1
  -4  -2  12 90.9932 85.4070   1
  -4  -2  11-21.9467 48.1209   1
  -4  -2  10 1248.63 168.705   1
  -4  -2   9 67.1905 41.1824   1
  -4  -2   8 329.642 67.6221   1
  -4  -2   7 1661.78 132.604   1
  -4  -2   6 24587.7 448.025   1
  -4  -2   5-15.0844 15.8695   1
  -4  -2   4 161.047 37.3683   1
   4   2  -3 16.4688 11.0539   1
  -4  -3  13 193.266 110.292   1
  -4  -3  12 1657.83 234.506   1
  -4  -3  11 114.501 61.6666   1
  -4  -3  10 12.7102 30.1395   1
  -4  -3   9 82.9323 41.2905   1
  -4  -3   8 245.781 58.8770   1
  -4  -3   7 154.705 45.5586   1
  -4  -3   6 10042.6 362.146   1
  -4  -3   5 16.1609 23.9523   1
   4   3  -5 24.8872 23.7980   1
   4   3  -4 2781.82 158.713   1
  -4  -3   4 2245.11 202.210   1
   4   3  -3 278.577 46.0647   1
   4   3  -2 336.786 56.3917   1
  -4  -4  13 82.9760 66.9777   1
  -4  -4  12 189.959 77.6602   1
  -4  -4  11 467.622 103.424   1
  -4  -4  10 245.709 72.1824   1
  -4  -4   9 877.005 126.122   1
  -4  -4   8 69.4414 44.0288   1
   4   4  -7 87.2045 49.5818   1
  -4  -4   7 75.3569 44.1107   1
  -4  -4   6 1934.58 182.802   1
   4   4  -6 1777.59 160.757   1
   4   4  -5 724.921 102.844   1
  -4  -4   5 771.771 137.071   1
  -4  -4   4 9965.47 502.208   1
   4   4  -4 9274.71 324.811   1
   4   4  -3 96.5640 36.2345   1
   4   4  -2 603.704 92.3891   1
  -4  -5  12 46.6819 52.8927   1
  -4  -5  11 668.437 139.538   1
  -4  -5  10 97.9819 61.3845   1
  -4  -5   9 423.791 102.183   1
  -4  -5   8 41.4793 41.8316   1
   4   5  -8-4.44209 37.3276   1
  -4  -5   7 320.048 91.8603   1
   4   5  -7 1200.44 154.179   1
   4   5  -6 394.425 89.7223   1
  -4  -5   6 372.789 110.433   1
  -4  -5   5 4392.34 391.726   1
   4   5  -5 4978.22 286.915   1
  -4  -5   4 5287.56 476.467   1
   4   5  -4 6259.08 310.977   1
   4   5  -3 40.7850 34.1798   1
   4   5  -2 254.916 69.4427   1
  -4  -6  12 452.707 124.461   1
  -4  -6  11 653.570 139.352   1
  -4  -6  10 74.5021 55.6642   1
   4   6  -9 82.8468 66.2414   1
  -4  -6   9 80.2097 59.2583   1
  -4  -6   8-37.4865 50.2806   1
   4   6  -8 10.9043 38.8659   1
   4   6  -7 87.3332 55.9964   1
  -4  -6   7 78.3320 73.5858   1
   4   6  -6 1123.90 160.534   1
  -4  -6   6 1157.78 227.524   1
  -4  -6   5 2857.32 351.494   1
   4   6  -5 2836.65 241.610   1
   4   6  -4 627.795 110.260   1
   4   6  -3 3456.85 271.554   1
   4   6  -2 1833.71 189.462   1
  -4  -7  11 22.9706 50.5879   1
  -4  -7  10-10.4059 46.2505   1
   4   7 -10 121.872 87.4971   1
  -4  -7   9 240.379 106.883   1
   4   7  -9 121.928 77.4100   1
   4   7  -8 511.640 127.754   1
  -4  -7   8 434.888 147.495   1
   4   7  -7-14.2299 44.6902   1
  -4  -7   7 50.4171 79.9885   1
  -4  -7   6 960.473 222.015   1
   4   7  -6 818.561 151.381   1
  -4  -7   5 89.1485 119.437   1
   4   7  -5 111.248 62.8291   1
   4   7  -4 1246.26 168.293   1
   4   7  -3 3922.85 311.593   1
   4   7  -2 3052.37 253.286   1
   4   8 -10 371.334 137.379   1
  -4  -8  10 274.002 129.369   1
  -4  -8   9 296.794 139.524   1
   4   8  -9 386.673 127.418   1
  -4  -8   8 1050.42 240.043   1
   4   8  -8 1224.67 212.472   1
   4   8  -7-0.44307 41.7894   1
  -4  -8   7 91.9171 96.2153   1
  -4  -8   6 2172.45 396.710   1
   4   8  -6 3015.69 305.581   1
   4   8  -5 126.993 70.6023   1
   4   8  -4 830.164 146.990   1
   4   8  -3 491.119 119.715   1
   4   9 -10 273.099 127.311   1
  -4  -9   9-129.535 106.916   1
   4   9  -9 78.3359 75.6386   1
   4   9  -8-99.3194 82.6166   1
  -4  -9   8 65.1017 95.7634   1
  -4  -9   7 344.184 186.901   1
   4   9  -7 782.380 179.027   1
   4   9  -6 94.7769 69.9851   1
   4   9  -5 257.558 99.3766   1
   4   9  -4 1387.37 196.316   1
   4   9  -3 87.5743 59.5866   1
  -4 -10   9 762.649 245.906   1
   4  10  -8 18.5402 62.8716   1
  -4 -10   8 163.004 155.588   1
   4  10  -7 734.257 182.755   1
   4  10  -6 91.5264 72.8436   1
   4  10  -5 54.3719 58.0373   1
   4  10  -4 139.342 70.4860   1
   4  11  -6-95.0069 76.5550   1
   4  11  -5 749.706 168.180   1
   4  11  -4 271.245 95.1258   1
  -5   9   1 446.187 146.120   1
   5  -9   0 1428.32 445.911   1
  -5   9   0 1551.93 251.486   1
  -5   9  -1-68.1605 65.5242   1
   5  -9   1-204.152 171.724   1
   5  -9   2 106.640 137.767   1
  -5   9  -2 30.7733 58.1926   1
   5  -9   3 847.721 300.119   1
  -5   8   1 78.1769 68.8383   1
  -5   8   0 70.0814 61.3212   1
   5  -8   0-7.97680 103.711   1
  -5   8  -1 122.837 75.6377   1
   5  -8   1-78.1498 113.583   1
   5  -8   2 1015.06 297.832   1
  -5   8  -2 1145.33 220.353   1
  -5   8  -3 425.899 145.209   1
   5  -8   3 274.119 163.216   1
   5  -8   4-197.267 129.901   1
  -5   8  -4-35.4218 62.1325   1
   5  -8   5 480.809 187.760   1
  -5   7   2-55.0008 54.0909   1
   5  -7  -1 11626.0 1069.78   1
  -5   7   1 701.457 161.915   1
  -5   7   0 416.304 118.820   1
   5  -7   0 512.183 198.950   1
   5  -7   1 755.912 239.772   1
  -5   7  -1 690.384 152.581   1
   5  -7   2 339.798 158.033   1
  -5   7  -2 386.179 125.726   1
  -5   7  -3 954.338 197.351   1
   5  -7   3 1027.07 238.508   1
   5  -7   4 349.510 142.140   1
  -5   7  -4 261.817 114.956   1
  -5   7  -5 3342.67 401.426   1
   5  -7   5 3894.80 448.042   1
  -5   7  -6 815.231 215.046   1
   5  -7   6 789.064 217.208   1
  -5   6   2 162.240 74.2379   1
  -5   6   1 657.131 144.745   1
   5  -6  -1 714.098 236.816   1
   5  -6   0 1621.53 312.661   1
  -5   6   0 1699.96 215.438   1
   5  -6   1 17906.5 959.667   1
  -5   6  -1 19310.0 742.639   1
  -5   6  -2 3399.32 339.827   1
   5  -6   2 3326.67 377.656   1
   5  -6   3 6.18002 45.6533   1
  -5   6  -3-20.6957 44.6089   1
   5  -6   4 1118.83 221.010   1
  -5   6  -4 966.335 196.952   1
  -5   6  -5 96.4997 79.1890   1
   5  -6   5 52.0755 72.7041   1
  -5   6  -6 155699. 2645.79   1
   5  -6   6 154077. 2737.90   1
   5  -6   7 166.098 100.411   1
  -5   6  -7 154.407 97.9132   1
   5  -6   8-0.54788 45.5263   1
  -5   6  -8 442.147 164.385   1
  -5   5   3 469.364 114.362   1
  -5   5   2 3564.81 295.223   1
  -5   5   1 587.224 123.149   1
   5  -5  -1 984.192 227.310   1
  -5   5   0 239.671 78.3830   1
   5  -5   0 222.954 113.616   1
   5  -5   1 316.193 111.929   1
  -5   5  -1 161.630 70.7276   1
  -5   5  -2 3436.82 311.318   1
   5  -5   2 3211.44 320.384   1
   5  -5   3 5076.61 432.559   1
  -5   5  -3 4858.09 388.364   1
   5  -5   4 411.719 130.671   1
  -5   5  -4 405.448 124.358   1
   5  -5   5 953.515 187.230   1
  -5   5  -5 868.205 186.090   1
   5  -5   6 97.1694 70.0101   1
  -5   5  -6 56.6216 62.8118   1
   5  -5   7 979.068 197.546   1
  -5   5  -7 993.644 214.353   1
   5  -5   8 695.764 172.635   1
  -5   5  -8 359.811 148.052   1
  -5   5  -9 1071.03 269.773   1
   5  -5   9 1379.78 245.920   1
  -5   4   3 388.636 96.1180   1
   5  -4  -2 1625.18 333.945   1
  -5   4   2 2329.50 225.947   1
  -5   4   1 628.900 111.944   1
   5  -4  -1 670.002 172.797   1
  -5   4   0 220.269 68.7011   1
   5  -4   0 293.475 100.429   1
   5  -4   1 770.846 142.226   1
  -5   4  -1 756.079 133.561   1
  -5   4  -2 16.9782 33.6419   1
   5  -4   2 25.0020 43.2261   1
   5  -4   3 12064.5 573.639   1
  -5   4  -3 11935.2 571.995   1
   5  -4   4 953.676 163.465   1
  -5   4  -4 895.936 169.493   1
   5  -4   5 287.232 96.9759   1
  -5   4  -5 265.103 97.8418   1
   5  -4   6 266.099 99.0538   1
  -5   4  -6 292.675 110.120   1
  -5   4  -7 17047.3 864.791   1
   5  -4   7 16770.3 781.016   1
  -5   4  -8 2285.05 354.842   1
   5  -4   8 2786.95 334.518   1
   5  -4   9 253.601 112.640   1
   5  -4  10 200.033 104.309   1
  -5   3   3 20591.5 598.357   1
   5  -3  -2 8417.59 625.077   1
  -5   3   2 9083.33 406.353   1
  -5   3   1 5788.04 290.443   1
   5  -3  -1 5283.65 404.600   1
  -5   3   0 4596.51 279.788   1
   5  -3   0 4106.03 292.122   1
   5  -3   1 1501.76 186.750   1
  -5   3  -1 1747.17 179.467   1
   5  -3   2 1007.76 142.500   1
  -5   3  -2 1072.28 152.275   1
  -5   3  -3 309.458 90.4442   1
   5  -3   3 203.682 69.9714   1
  -5   3  -4 915.416 154.569   1
   5  -3   4 884.842 151.786   1
  -5   3  -5 2751.52 290.987   1
   5  -3   5 2887.52 291.280   1
  -5   3  -6 2538.95 307.781   1
   5  -3   6 2949.79 302.981   1
   5  -3   7 56.9811 54.5062   1
   5  -3   8 2195.64 279.673   1
   5  -3   9 270.923 107.968   1
   5  -3  10 1427.14 243.351   1
   5  -3  11 326.402 125.503   1
  -5   2   3 999999. 3444.33   1
  -5   2   2 1556.99 130.132   1
   5  -2  -2 981.639 180.494   1
   5  -2  -1 705.027 116.675   1
  -5   2   1 701.036 91.3441   1
   5  -2   0 513.549 94.1214   1
  -5   2   0 557.932 86.9752   1
   5  -2   1 1563.21 149.412   1
  -5   2  -1 164.485 54.7607   1
  -5   2  -2 1967.54 185.416   1
   5  -2   2 1909.36 179.305   1
  -5   2  -3 950.518 139.020   1
   5  -2   3 871.504 135.169   1
   5  -2   4 250.545 78.6508   1
  -5   2  -4 205.848 77.6199   1
  -5   2  -5 2104.83 262.827   1
   5  -2   5 2244.31 240.972   1
   5  -2   6 252.382 88.9098   1
   5  -2   7-11.7475 36.7734   1
   5  -2   8 6736.63 475.383   1
   5  -2   9 359.323 120.114   1
  -5   1   4 113.561 41.9665   1
  -5   1   3 5813.95 216.286   1
   5  -1  -2-6.69780 35.1234   1
  -5   1   2 29.8307 18.2798   1
   5  -1  -1 39264.9 641.304   1
  -5   1   1 39035.0 568.226   1
  -5   1   0 49.3296 26.6145   1
   5  -1   0 83.5377 31.1475   1
  -5   1  -1 9857.96 348.420   1
   5  -1   1 8961.52 336.507   1
   5  -1   2 38.7997 30.2558   1
  -5   1  -2 69.8157 40.2624   1
   5  -1   3 2675.77 220.755   1
   5  -1   4 3376.62 268.952   1
   5  -1   5 9086.90 453.875   1
   5  -1   6 207.093 74.7862   1
   5  -1   7 93.1751 55.6575   1
  -5   0   2 8698.74 187.682   1
   5   0  -1 241.861 38.0033   1
   5   0   0 79.7540 27.1539   1
   5   0   1 286.636 58.6685   1
   5   0   2 5656.59 262.786   1
   5   0   3 119.367 44.6686   1
   5   0   4 98.5820 45.6587   1
  -5  -1  11-66.0397 90.4210   1
  -5  -1  10 312.095 103.969   1
  -5  -1   9-36.5836 40.7171   1
  -5  -1   8 10419.5 368.739   1
  -5  -1   7 105.344 33.9646   1
  -5  -1   6 1658.43 94.2747   1
   5   1  -1 2570.55 101.742   1
   5   1   0 10330.0 255.948   1
  -5  -2  13 986.441 241.624   1
  -5  -2  12 74.8415 67.5733   1
  -5  -2  11 1200.54 167.700   1
  -5  -2  10 1721.18 170.919   1
  -5  -2   9-38.2171 30.2666   1
  -5  -2   8 783.952 89.9447   1
  -5  -2   7 4096.85 174.873   1
  -5  -2   6 11.6585 15.8556   1
  -5  -2   5 531.926 64.2719   1
  -5  -3  12 153.671 66.0021   1
  -5  -3  11 111.334 50.0535   1
  -5  -3  10-28.3218 28.9532   1
  -5  -3   9 23.1296 24.8840   1
  -5  -3   8 95.7942 38.1463   1
  -5  -3   7 697.531 95.1951   1
  -5  -3   6 957.180 110.172   1
  -5  -3   5 1217.55 147.887   1
   5   3  -4 1638.45 101.421   1
   5   3  -3 5385.57 172.928   1
   5   3  -2 55.1077 25.9907   1
  -5  -4  11 1.69567 26.8086   1
  -5  -4  10 2084.76 195.863   1
  -5  -4   9 1907.10 185.045   1
  -5  -4   8 68.7694 39.6441   1
  -5  -4   7 470.174 92.8655   1
  -5  -4   6 199.874 77.2637   1
   5   4  -6 178.990 51.8648   1
  -5  -4   5 309.965 102.452   1
   5   4  -5 238.566 53.8081   1
   5   4  -4 262.772 52.4397   1
   5   4  -3 9487.49 299.188   1
   5   4  -2 0.73026 20.5374   1
  -5  -5  11 147.101 64.3461   1
  -5  -5  10 100.407 52.0764   1
  -5  -5   9 1379.92 169.236   1
  -5  -5   8 461.702 104.783   1
  -5  -5   7 112.042 71.2371   1
   5   5  -7 119.952 53.1297   1
  -5  -5   6 784.924 161.444   1
   5   5  -6 714.991 107.007   1
  -5  -5   5 1050.80 232.736   1
   5   5  -5 1526.99 150.323   1
   5   5  -4 402.515 76.9648   1
   5   5  -3 155.747 53.5184   1
   5   5  -2 865.626 115.875   1
  -5  -6  10-4.65781 36.0304   1
  -5  -6   9 142.809 75.7736   1
  -5  -6   8 692.960 159.638   1
   5   6  -8 723.160 134.347   1
  -5  -6   7-90.9771 78.2949   1
   5   6  -7 49.8029 43.2533   1
   5   6  -6 46.3883 42.3684   1
  -5  -6   6 184.094 112.519   1
   5   6  -5 1930.85 189.021   1
   5   6  -4 233.064 66.7267   1
   5   6  -3 274.663 79.2988   1
   5   6  -2 199.461 63.7943   1
  -5  -7   9 58.6245 72.8611   1
   5   7  -9 185.744 86.1370   1
  -5  -7   8 1588.40 256.830   1
   5   7  -8 1708.35 213.551   1
   5   7  -7-11.7117 40.0889   1
  -5  -7   7 5.62017 68.5132   1
  -5  -7   6-80.3971 121.554   1
   5   7  -6-19.3222 38.9453   1
   5   7  -5 151.593 66.8326   1
   5   7  -4 568.177 110.482   1
   5   7  -3 1200.69 169.633   1
   5   8 -10 55.1333 70.2679   1
  -5  -8   9 133.822 93.3671   1
   5   8  -9 153.244 84.9380   1
  -5  -8   8 122.252 105.788   1
   5   8  -8 27.4100 50.4814   1
   5   8  -7-0.45432 40.6752   1
  -5  -8   7-197.522 150.333   1
   5   8  -6 930.202 166.096   1
   5   8  -5 100.581 61.9813   1
   5   8  -4 764.954 135.163   1
   5   8  -3 717.506 138.818   1
   5   9  -9 729.653 171.994   1
   5   9  -8-33.6951 59.0255   1
  -5  -9   8 148.826 139.256   1
   5   9  -7 1052.02 197.025   1
   5   9  -6-52.9870 56.1119   1
   5   9  -5-85.2387 61.4759   1
   5   9  -4 113.468 60.6440   1
   5   9  -3 78.0054 54.7613   1
   5  10  -9 421.743 141.984   1
   5  10  -8 63.6059 73.5452   1
   5  10  -7 4.02796 47.9839   1
   5  10  -6 76.3236 65.6715   1
   5  10  -5 593.829 140.668   1
   5  10  -4 203.454 78.3533   1
   5  11  -7 234.914 108.315   1
   5  11  -6-7.88533 44.7735   1
   5  11  -5 795.532 164.429   1
   5  11  -4 162.834 72.0806   1
  -6   9   1 105.964 75.7402   1
  -6   9   0 127.646 81.9821   1
   6  -9   0-212.939 210.912   1
   6  -9   1 679.594 272.005   1
  -6   9  -1 866.613 200.124   1
   6  -9   2 1514.55 389.271   1
  -6   8   2 577.913 159.212   1
  -6   8   1-53.7257 56.6669   1
   6  -8  -1 254.962 228.326   1
  -6   8   0 120.144 75.4254   1
   6  -8   0-229.131 171.712   1
   6  -8   1 407.839 201.015   1
  -6   8  -1 294.212 116.178   1
   6  -8   2 300.326 177.914   1
  -6   8  -2 565.439 166.009   1
  -6   8  -3 578.642 170.389   1
   6  -8   3 502.196 210.240   1
   6  -8   4 977.300 264.421   1
  -6   7   2 52.1879 58.3591   1
  -6   7   1 1624.31 228.594   1
   6  -7  -1 1321.43 365.858   1
   6  -7   0 1647.86 344.586   1
  -6   7   0 1314.09 208.136   1
   6  -7   1 607.044 218.728   1
  -6   7  -1 719.200 165.697   1
  -6   7  -2 577.728 157.001   1
   6  -7   2 582.280 199.334   1
  -6   7  -3 467.772 147.151   1
   6  -7   3 303.254 141.874   1
   6  -7   4 177.835 111.955   1
  -6   7  -4 70.4251 74.2265   1
   6  -7   5 720.609 205.500   1
  -6   7  -5 658.040 195.091   1
   6  -7   6 1270.13 280.227   1
  -6   6   3 753.185 149.560   1
  -6   6   2 326.787 106.020   1
   6  -6  -1 384.982 177.142   1
  -6   6   1 333.595 99.9675   1
   6  -6   0 3155.95 447.245   1
  -6   6   0 3789.92 327.876   1
   6  -6   1 157.487 108.819   1
  -6   6  -1 130.067 74.1278   1
   6  -6   2 691.963 181.446   1
  -6   6  -2 668.798 156.061   1
   6  -6   3 14.8182 51.2533   1
  -6   6  -3 117.790 77.9849   1
  -6   6  -4-123.328 84.6381   1
   6  -6   4-43.0239 65.0393   1
  -6   6  -5-69.9961 75.1932   1
   6  -6   5-105.002 93.3471   1
   6  -6   6 851.118 219.655   1
  -6   6  -6 480.836 159.017   1
   6  -6   7 2099.85 332.928   1
  -6   6  -7 1650.68 297.530   1
  -6   5   3 9967.30 495.094   1
   6  -5  -2-89.7869 138.349   1
  -6   5   2 9.48798 33.8144   1
  -6   5   1 1025.34 155.126   1
   6  -5  -1 1097.88 245.250   1
   6  -5   0 103.256 89.5684   1
  -6   5   0-24.2346 38.1062   1
   6  -5   1 119.484 77.8630   1
  -6   5  -1 29.2599 42.8726   1
   6  -5   2 343.061 113.650   1
  -6   5  -2 328.302 105.300   1
  -6   5  -3-91.1775 66.8381   1
   6  -5   3 186.058 95.4646   1
   6  -5   4 2658.61 330.077   1
  -6   5  -4 2434.62 310.020   1
  -6   5  -5 281.711 112.963   1
   6  -5   5 271.303 110.060   1
   6  -5   6 151.166 87.1463   1
  -6   5  -6 202.200 102.959   1
   6  -5   7 129.454 83.8211   1
  -6   5  -7 112.916 91.7426   1
   6  -5   8 116.043 82.8937   1
  -6   5  -8-154.461 112.775   1
  -6   4   4 1839.91 204.214   1
  -6   4   3 200.562 71.8373   1
  -6   4   2 3435.30 258.168   1
   6  -4  -2 2629.82 409.041   1
   6  -4  -1 1989.92 303.603   1
  -6   4   1 954.414 137.541   1
   6  -4   0 67.6650 59.4691   1
  -6   4   0 48.7414 42.3246   1
   6  -4   1 737.099 144.150   1
  -6   4  -1 807.832 140.618   1
  -6   4  -2 298.280 94.3174   1
   6  -4   2 290.084 102.489   1
  -6   4  -3 126.052 71.7935   1
   6  -4   3 124.947 68.2923   1
   6  -4   4 924.892 167.787   1
  -6   4  -4 919.781 174.277   1
  -6   4  -5 2625.42 303.569   1
   6  -4   5 2636.69 290.803   1
   6  -4   6-30.6443 48.1069   1
  -6   4  -6-7.67473 47.7314   1
  -6   4  -7 116.728 92.5129   1
   6  -4   7 122.705 79.6544   1
   6  -4   8 432.783 141.135   1
   6  -4   9 1626.22 275.263   1
  -6   3   4 1431.58 159.201   1
  -6   3   3 1535.38 168.719   1
  -6   3   2 3679.67 230.542   1
   6  -3  -2 1907.75 290.546   1
  -6   3   1-39.3732 33.0682   1
   6  -3  -1 42.8524 57.1131   1
   6  -3   0 547.540 112.849   1
  -6   3   0 457.507 92.7879   1
   6  -3   1 12786.6 563.079   1
  -6   3  -1 14078.5 536.384   1
   6  -3   2 1126.67 157.421   1
  -6   3  -2 1146.93 168.241   1
  -6   3  -3 1463.42 191.998   1
   6  -3   3 1491.46 186.513   1
  -6   3  -4 2916.62 286.182   1
   6  -3   4 3179.66 289.408   1
  -6   3  -5 945.435 183.830   1
   6  -3   5 1004.96 177.650   1
   6  -3   6 737.679 160.516   1
  -6   3  -6 601.272 166.117   1
   6  -3   7 151.655 80.8887   1
   6  -3   8 191.674 91.7756   1
   6  -3   9 53.1744 59.8242   1
   6  -3  10 142.179 87.5540   1
  -6   2   4 728.995 93.8070   1
  -6   2   3 4367.14 213.714   1
   6  -2  -2 22366.6 792.776   1
  -6   2   2 20953.4 484.671   1
  -6   2   1 4619.75 240.081   1
   6  -2  -1 4494.78 293.580   1
   6  -2   0 8843.87 401.816   1
  -6   2   0 9295.02 372.266   1
   6  -2   1 2465.25 197.908   1
  -6   2  -1 2450.34 204.570   1
   6  -2   2 103.362 47.6625   1
  -6   2  -2 68.6557 42.4512   1
  -6   2  -3 2811.54 256.822   1
   6  -2   3 2886.52 253.380   1
  -6   2  -4 3630.64 325.266   1
   6  -2   4 3572.12 292.202   1
   6  -2   5 886.546 156.208   1
   6  -2   6 63.5921 52.9075   1
   6  -2   7 214.993 88.8960   1
   6  -2   8 66.3360 58.7582   1
   6  -2   9 1135.12 208.141   1
  -6   1   5 522.028 79.3891   1
  -6   1   4 3567.89 156.802   1
  -6   1   3 27.9276 17.7080   1
   6  -1  -2 3389.88 248.430   1
  -6   1   2 2966.59 151.342   1
  -6   1   1 161.318 41.9753   1
   6  -1   0 3126.98 185.781   1
  -6   1   0 3178.35 190.625   1
  -6   1  -1 10526.2 400.905   1
   6  -1   1 10301.8 373.405   1
   6  -1   2 253.835 66.1191   1
  -6   1  -2 257.882 76.7823   1
   6  -1   3 1740.87 182.501   1
   6  -1   4 251.206 77.8582   1
   6  -1   5 7297.68 423.464   1
   6  -1   6 1888.98 223.495   1
   6  -1   7 359.138 103.272   1
   6   0  -2 251.750 55.2398   1
   6   0  -1 4224.30 175.717   1
   6   0   0 17831.7 403.004   1
   6   0   1 652.864 88.3236   1
   6   0   2 4005.64 237.279   1
   6   0   3 1564.27 153.179   1
   6   0   4 1764.16 171.926   1
  -6  -1  11 1888.91 235.471   1
  -6  -1  10-101.334 51.7564   1
  -6  -1   9 568.251 83.0881   1
  -6  -1   8 79.1626 27.5520   1
  -6  -1   7 1804.28 93.5797   1
   6   1  -1 952.565 67.4439   1
   6   1   1 223341. 1414.89   1
  -6  -2  11 113.283 47.2998   1
  -6  -2  10-56.0933 30.9618   1
  -6  -2   9 267.103 49.1688   1
  -6  -2   8 33.7756 19.7115   1
  -6  -2   7 108.013 30.3258   1
  -6  -2   6 348.752 59.4555   1
  -6  -3  10 335.218 65.8619   1
  -6  -3   9 171091. 1448.80   1
  -6  -3   8-35.6804 26.7058   1
  -6  -3   7 1829.12 157.581   1
  -6  -3   6 361.906 86.2603   1
   6   3  -3 43.9698 14.1696   1
   6   3  -2 672.485 73.9742   1
  -6  -4  10 269.462 64.7467   1
  -6  -4   9 216.509 61.4061   1
  -6  -4   8 1132.82 144.859   1
  -6  -4   7 365.079 97.8212   1
   6   4  -5 294.356 50.3467   1
   6   4  -4 58.7231 25.5419   1
   6   4  -3 1158.69 95.4642   1
   6   4  -2 953.299 108.177   1
  -6  -5   9 108.218 62.8458   1
  -6  -5   8 58.2586 59.1770   1
  -6  -5   7 294.145 109.397   1
   6   5  -6 71.4232 36.1089   1
   6   5  -5 1232.87 125.580   1
   6   5  -4 15.0471 23.9244   1
   6   5  -3 13813.4 427.572   1
   6   5  -2 316.498 70.0276   1
  -6  -6   9 650.752 144.975   1
   6   6  -8 468.658 103.956   1
  -6  -6   8 861.638 173.995   1
   6   6  -7 771.837 117.836   1
   6   6  -6 356.124 84.3324   1
   6   6  -5 1741.12 168.675   1
   6   6  -4 2979.35 212.380   1
   6   6  -3 4390.71 283.316   1
   6   7  -9-137.629 73.9783   1
  -6  -7   8 167.995 117.904   1
   6   7  -8 196.470 76.4464   1
   6   7  -7 429.138 102.275   1
   6   7  -6 726.919 128.903   1
   6   7  -5 989.600 145.647   1
   6   7  -4 395.904 88.8207   1
   6   7  -3 507.305 108.536   1
   6   8  -9 2.78592 43.0864   1
   6   8  -8-55.6092 54.2067   1
   6   8  -7 445.544 120.395   1
   6   8  -6 6.19257 37.2571   1
   6   8  -5 299.745 91.9780   1
   6   8  -4 229.944 74.3692   1
   6   8  -3 496.979 111.514   1
   6   9  -8 246.781 99.0589   1
   6   9  -7 52.2019 58.8417   1
   6   9  -6 392.712 112.881   1
   6   9  -5 81.5867 58.2047   1
   6   9  -4 326.067 89.8877   1
   6   9  -3 317.939 91.9661   1
   6  10  -7-97.4555 72.3474   1
   6  10  -6 12.7407 43.0677   1
   6  10  -5 321.812 102.001   1
   6  10  -4 40.4581 41.8447   1
   6  11  -6 13.5786 43.4697   1
   6  11  -5-87.5508 61.2365   1
  -7   9   2 9.05260 43.8369   1
  -7   9   1-9.09705 44.7492   1
  -7   9   0 45.3221 61.5090   1
   7  -9   0 45.8160 154.258   1
  -7   8   2-33.3378 50.6616   1
   7  -8  -1 1364.76 440.349   1
  -7   8   1 1553.11 239.894   1
   7  -8   0 58.0160 121.636   1
  -7   8   0 27.5928 51.8510   1
   7  -8   1 31.8324 104.628   1
  -7   8  -1 164.046 97.3557   1
   7  -8   2 45.3652 108.435   1
  -7   8  -2 4.31434 48.3271   1
   7  -8   3 1477.11 351.467   1
  -7   7   3 1450.77 231.602   1
  -7   7   2 49.2585 52.4053   1
   7  -7  -1 595.990 260.324   1
  -7   7   1 537.548 135.721   1
   7  -7   0 337.365 175.761   1
  -7   7   0 412.318 127.810   1
   7  -7   1 148.774 132.204   1
  -7   7  -1 82.9059 71.5497   1
   7  -7   2 846.552 243.441   1
  -7   7  -2 991.881 207.311   1
  -7   7  -3 160.112 98.4688   1
   7  -7   3 144.671 110.190   1
  -7   7  -4 91.1320 87.3527   1
   7  -7   4 132.944 104.362   1
   7  -7   5 672.373 203.286   1
  -7   6   4 30.6532 45.6565   1
  -7   6   3 1598.50 223.759   1
  -7   6   2 1712.22 217.862   1
  -7   6   1 153.009 72.6160   1
   7  -6  -1 190.295 138.448   1
   7  -6   0 179.937 131.722   1
  -7   6   0 304.963 105.226   1
  -7   6  -1-29.3868 48.6789   1
   7  -6   1 83.5452 91.6342   1
  -7   6  -2 581.707 153.610   1
   7  -6   2 591.412 174.135   1
   7  -6   3 77.6772 75.8459   1
  -7   6  -3 156.464 91.5613   1
   7  -6   4 1713.60 289.565   1
  -7   6  -4 1270.54 251.590   1
  -7   6  -5 1303.77 256.065   1
   7  -6   5 791.134 220.794   1
   7  -6   6-254.753 135.035   1
  -7   6  -6-199.346 115.169   1
  -7   5   4 936.841 159.645   1
  -7   5   3 837.296 146.864   1
  -7   5   2 4767.30 329.486   1
   7  -5  -2 4212.66 606.268   1
   7  -5  -1-42.9224 84.2553   1
  -7   5   1 94.4094 56.6452   1
  -7   5   0 8149.28 481.725   1
   7  -5   0 7751.08 622.771   1
   7  -5   1 116.246 80.4460   1
  -7   5  -1 130.437 70.7692   1
   7  -5   2 627.657 154.858   1
  -7   5  -2 591.450 145.128   1
   7  -5   3 2209.31 304.275   1
  -7   5  -3 2112.26 288.959   1
  -7   5  -4 68.3881 66.9510   1
   7  -5   4 182.977 101.087   1
   7  -5   5 855.179 193.260   1
  -7   5  -5 854.473 194.248   1
   7  -5   6-5.27818 45.3939   1
  -7   5  -6-11.7836 55.9446   1
   7  -5   7 530.447 158.563   1
  -7   5  -7 258.174 133.931   1
  -7   4   5 643.741 121.323   1
  -7   4   4 363.500 96.5023   1
  -7   4   3 9145.21 414.122   1
  -7   4   2 205.861 66.7724   1
   7  -4  -2 567.972 202.647   1
   7  -4  -1 145.701 103.873   1
  -7   4   1 58.3883 44.6857   1
  -7   4   0 3068.01 266.551   1
   7  -4   0 2907.94 310.449   1
   7  -4   1 756.176 151.500   1
  -7   4  -1 692.546 138.003   1
  -7   4  -2 119.706 69.4854   1
   7  -4   2 67.2926 61.2439   1
   7  -4   3 1126.91 193.573   1
  -7   4  -3 1131.60 192.087   1
   7  -4   4-44.4833 50.2404   1
  -7   4  -4-17.3021 44.2992   1
   7  -4   5 1110.21 195.670   1
  -7   4  -5 1171.66 218.969   1
   7  -4   6 75.4065 63.8629   1
  -7   4  -6-23.5617 59.7580   1
  -7   4  -7 109.222 98.8050   1
   7  -4   7 145.023 85.6013   1
   7  -4   8 384.492 136.171   1
   7  -4   9 336.633 131.867   1
  -7   3   5 116.308 49.6780   1
  -7   3   4 2385.83 198.650   1
  -7   3   3 1126.91 126.407   1
   7  -3  -2 102.264 89.2139   1
  -7   3   2 145.170 52.6554   1
  -7   3   1 3754.27 253.475   1
   7  -3  -1 3894.41 368.389   1
   7  -3   0 395.676 101.671   1
  -7   3   0 541.985 106.054   1
  -7   3  -1 272.648 84.6508   1
   7  -3   1 338.187 100.269   1
  -7   3  -2 83.8427 53.0867   1
   7  -3   2 22.0975 35.8861   1
   7  -3   3 666.905 129.781   1
  -7   3  -3 746.283 144.056   1
   7  -3   4 73.1779 52.9630   1
  -7   3  -4 4.18750 38.8272   1
  -7   3  -5-118.813 80.4268   1
   7  -3   5 48.8257 50.9597   1
   7  -3   6 54.1315 56.5874   1
   7  -3   7 2418.48 300.686   1
   7  -3   8 131.239 80.6794   1
   7  -3   9 32.8812 53.6089   1
   7  -3  10 726.006 180.730   1
  -7   2   6 6312.10 311.887   1
  -7   2   5 45.4877 30.5584   1
  -7   2   4 3990.64 192.464   1
  -7   2   3 7819.39 286.886   1
  -7   2   2 264.443 58.1667   1
   7  -2  -2 364.633 112.400   1
  -7   2   1 7513.43 324.708   1
   7  -2  -1 7612.38 401.898   1
  -7   2   0 245.645 66.3626   1
   7  -2   0 2025.44 201.637   1
   7  -2   1 1086.04 139.088   1
  -7   2  -1 1162.26 144.475   1
   7  -2   2 35.6197 34.3029   1
  -7   2  -2-2.53347 28.1948   1
  -7   2  -3 965.594 163.049   1
   7  -2   3 957.367 148.950   1
   7  -2   4 8138.47 452.784   1
   7  -2   5 1064.40 170.872   1
   7  -2   6 71.5113 55.8006   1
   7  -2   7 6602.22 462.552   1
   7  -2   8 320.373 111.267   1
   7  -2   9-27.8481 48.7885   1
  -7   1   6 1875.25 118.927   1
  -7   1   5 263.408 36.4196   1
  -7   1   4 1204.22 81.0594   1
  -7   1   3 199.841 39.8893   1
   7  -1  -2 164.255 69.4867   1
  -7   1   2 88.6654 31.3314   1
   7  -1  -1 683.715 99.2701   1
  -7   1   1 620.772 84.1320   1
   7  -1   0 674.214 94.1504   1
  -7   1   0 717.466 104.226   1
   7  -1   1 281.896 65.6990   1
   7  -1   2 522.326 96.5406   1
   7  -1   3 1554.62 174.591   1
   7  -1   4 152.392 62.6436   1
   7  -1   5 904.536 150.675   1
   7  -1   6 1838.19 227.096   1
   7  -1   7 4993.47 382.977   1
  -7   0   9 26.4257 42.7750   1
  -7   0   8 254.755 51.8472   1
   7   0  -2 8611.30 346.530   1
   7   0  -1 708.964 84.0242   1
   7   0   0 5212.46 228.895   1
   7   0   1-27.6268 25.0779   1
   7   0   2 821.007 111.500   1
   7   0   3 1110.82 136.540   1
   7   0   4 2465.27 205.960   1
  -7  -1  10 404.326 60.0570   1
  -7  -1   9-14.4412 13.0631   1
  -7  -1   8 9.81131 8.32600   1
   7   1  -1 4375.12 160.865   1
   7   1   0 1540.59 114.093   1
   7   1   1 2084.77 138.690   1
   7   1   2 53.1286 28.3808   1
  -7  -2   9 3786.98 163.750   1
  -7  -2   8 96.8251 28.4231   1
   7   2  -1 454.198 44.0402   1
  -7  -3   9 167.926 46.6458   1
  -7  -3   8 12.2270 29.6572   1
  -7  -4   8 440.378 114.927   1
   7   4  -4 2872.19 124.567   1
   7   4  -3 159.078 32.0587   1
   7   4  -2 301.507 57.3276   1
   7   5  -6 44.1012 27.6463   1
   7   5  -5 87.2077 33.6701   1
   7   5  -4 89.5444 33.5685   1
   7   5  -3 56.3241 31.4853   1
   7   6  -7 409.371 81.4246   1
   7   6  -6 749.662 102.937   1
   7   6  -5 282807. 1972.58   1
   7   6  -4 1035.61 120.115   1
   7   6  -3 1133.26 136.016   1
   7   7  -8 80.1382 51.5623   1
   7   7  -7 591.327 106.696   1
   7   7  -6 1874.45 192.477   1
   7   7  -5-69.3560 44.0899   1
   7   7  -4 66.7069 41.0899   1
   7   7  -3 110.818 53.7108   1
   7   8  -7 114.526 62.5000   1
   7   8  -6 205.474 75.9340   1
   7   8  -5 371.918 95.5785   1
   7   8  -4-88.2564 48.5820   1
   7   8  -3 953.636 143.658   1
   7   9  -6 125.802 67.5902   1
   7   9  -5 1549.21 198.258   1
   7   9  -4 357.541 89.4132   1
   7  10  -5 106.357 62.3876   1
   7  10  -4 300.871 84.3560   1
   7  11  -5 260.614 89.1878   1
  -8   9   2 1934.51 282.956   1
  -8   9   1 464.646 147.379   1
  -8   8   3-139.229 80.0667   1
  -8   8   2 1458.93 232.973   1
   8  -8  -1 259.847 238.784   1
  -8   8   1 299.329 115.745   1
   8  -8   0 568.155 251.595   1
  -8   8   0 340.657 131.236   1
   8  -8   1 104.833 135.889   1
  -8   8  -1 145.802 94.2200   1
   8  -8   2 1130.62 326.399   1
  -8   7   4 224.034 96.5779   1
  -8   7   3 211.883 88.7152   1
  -8   7   2 3.82909 37.3824   1
  -8   7   1-80.3413 66.2198   1
   8  -7  -1 207.842 182.084   1
   8  -7   0-113.242 126.846   1
  -8   7   0-3.42669 43.5214   1
   8  -7   1 105.019 123.267   1
  -8   7  -1 135.480 85.8755   1
  -8   7  -2 245.487 116.098   1
   8  -7   2 629.451 221.002   1
  -8   7  -3 961.632 226.644   1
   8  -7   3 860.234 238.547   1
   8  -7   4 1157.09 268.751   1
  -8   6   4 167.233 78.2220   1
  -8   6   3 777.220 146.850   1
  -8   6   2 3039.52 290.926   1
   8  -6  -1 67.5020 108.397   1
  -8   6   1 107.375 68.8917   1
   8  -6   0 2399.62 413.774   1
  -8   6   0 3245.56 332.543   1
  -8   6  -1 176.920 90.6453   1
   8  -6   1 201.642 128.469   1
  -8   6  -2-44.1575 61.3323   1
   8  -6   2 37.5889 70.1847   1
  -8   6  -3 64.4313 74.1789   1
   8  -6   3-39.7527 67.0868   1
  -8   6  -4 798.395 203.149   1
   8  -6   4 1169.29 245.658   1
   8  -6   5 1385.45 291.693   1
  -8   6  -5 1087.70 240.640   1
  -8   5   5 1646.91 215.913   1
  -8   5   4 376.709 97.6269   1
  -8   5   3 684.004 126.177   1
   8  -5  -2 237.780 184.248   1
  -8   5   2 198.619 75.8925   1
   8  -5  -1 890.238 238.363   1
  -8   5   1 784.314 150.183   1
  -8   5   0-81.9640 59.2513   1
   8  -5   0 39.4484 78.9107   1
  -8   5  -1 547.579 138.413   1
   8  -5   1 730.626 180.670   1
   8  -5   2 89.0855 72.2907   1
  -8   5  -2 47.0550 59.1423   1
   8  -5   3 1287.41 235.136   1
  -8   5  -3 1317.81 231.610   1
   8  -5   4 2094.72 319.076   1
  -8   5  -4 2118.86 297.961   1
   8  -5   5 375.150 137.811   1
  -8   5  -5 270.428 121.093   1
   8  -5   6 1372.15 251.412   1
  -8   5  -6 872.253 224.930   1
   8  -5   7 659.537 178.086   1
  -8   4   6 2560.58 227.011   1
  -8   4   5 82.0382 50.9314   1
  -8   4   4 3047.86 229.800   1
  -8   4   3 1176.86 146.581   1
  -8   4   2 68.7516 46.8287   1
   8  -4  -2-165.322 133.672   1
   8  -4  -1 68.1416 89.3026   1
  -8   4   1 54.1898 43.9705   1
  -8   4   0 283.786 89.4153   1
   8  -4   0 248.043 104.088   1
  -8   4  -1 5.27493 37.1765   1
   8  -4   1 94.4149 66.1383   1
  -8   4  -2-55.1576 54.4175   1
   8  -4   2 120.609 76.4423   1
   8  -4   3 3507.68 353.631   1
  -8   4  -3 3301.34 329.293   1
   8  -4   4 684.919 155.188   1
  -8   4  -4 635.166 158.925   1
   8  -4   5 251.797 99.8829   1
  -8   4  -5 328.229 130.272   1
   8  -4   6 574.505 151.103   1
  -8   4  -6 650.988 194.490   1
   8  -4   7 14.2246 46.1400   1
   8  -4   8 45.0435 60.5598   1
  -8   3   6 1768.55 166.398   1
  -8   3   5-0.79754 20.3796   1
  -8   3   4 21.0197 25.0736   1
  -8   3   3 277.263 67.8333   1
   8  -3  -2 1422.95 256.941   1
  -8   3   2 1034.17 129.520   1
  -8   3   1 1757.22 180.591   1
   8  -3  -1 1813.21 266.145   1
  -8   3   0 1312.27 170.566   1
   8  -3   0 1409.73 195.784   1
  -8   3  -1 378.136 96.4722   1
   8  -3   1 397.990 110.243   1
   8  -3   2 44.6303 46.1397   1
  -8   3  -2 69.5976 51.9350   1
   8  -3   3 245.703 84.0250   1
  -8   3  -3 281.745 99.2464   1
   8  -3   4 50.6006 47.9755   1
  -8   3  -4 47.0060 58.5877   1
  -8   3  -5 1690.75 276.950   1
   8  -3   5 2207.88 263.220   1
   8  -3   6 1999.54 266.038   1
   8  -3   7 231.547 101.922   1
   8  -3   8-158.888 88.5156   1
   8  -3   9 109.949 78.3875   1
  -8   2   7 583.843 80.6699   1
  -8   2   6 169.358 42.1142   1
  -8   2   5 4050.46 176.410   1
  -8   2   4 83.0365 31.7852   1
  -8   2   3 22.5057 23.2108   1
  -8   2   2 255.517 61.6794   1
   8  -2  -2 269.768 104.704   1
  -8   2   1 824.837 111.116   1
   8  -2  -1 1030.28 159.578   1
   8  -2   0 6121.04 354.651   1
  -8   2   0 5851.48 310.802   1
   8  -2   1 60.4949 42.8703   1
  -8   2  -1 105.935 54.0335   1
  -8   2  -2 3668.77 303.690   1
   8  -2   2 3638.88 268.419   1
  -8   2  -3 1111.93 188.914   1
   8  -2   3 1240.62 169.478   1
   8  -2   4 271.575 89.2225   1
   8  -2   5 1154.56 179.891   1
   8  -2   6 468.167 120.681   1
   8  -2   7 1367.76 211.604   1
   8  -2   8 363.604 117.121   1
  -8   1   7 16.9121 11.5656   1
  -8   1   6 39.0995 13.3970   1
  -8   1   5 1457.81 82.0534   1
  -8   1   4 2459.78 124.461   1
  -8   1   3 8139.00 259.279   1
   8  -1  -2 4070.48 311.631   1
  -8   1   2 3592.42 204.487   1
  -8   1   1 1090.36 131.703   1
   8  -1  -1 1212.14 140.751   1
   8  -1   0 2392.67 191.422   1
   8  -1   1 16.0871 25.1958   1
   8  -1   2 1676.43 174.663   1
   8  -1   3 638.177 113.522   1
   8  -1   4 4236.16 303.435   1
   8  -1   5-45.8779 42.0643   1
   8  -1   6 138.040 65.9675   1
   8  -1   7-57.4513 50.5787   1
   8   0  -2 1743.10 169.828   1
   8   0  -1 600.731 90.0816   1
   8   0   0 976.462 102.318   1
   8   0   1 233.771 57.7556   1
   8   0   2 3717.03 235.293   1
   8   0   3 34.5061 31.9923   1
   8   0   4 2788.22 228.117   1
   8   0   5 64.5825 41.2560   1
   8   1  -2 569.727 69.5082   1
   8   1  -1 850.119 75.9249   1
   8   1   0 182.431 42.7769   1
   8   1   1 1084.93 110.718   1
   8   1   2 994.164 105.996   1
   8   1   3 2410.80 171.445   1
   8   2  -1 172.094 31.6098   1
   8   2   0 26.8862 16.9457   1
   8   5  -5-54.8430 21.4134   1
   8   5  -4 258.842 43.9660   1
   8   5  -3 1045.67 92.7221   1
   8   6  -6 1019.10 103.926   1
   8   6  -5 434.117 72.9849   1
   8   6  -4 1000.93 109.638   1
   8   6  -3-42.8013 32.2444   1
   8   7  -6 7.15358 27.4617   1
   8   7  -5 2211.06 184.152   1
   8   7  -4 1241.68 135.526   1
   8   7  -3 789.674 115.140   1
   8   8  -5 251.781 73.7908   1
   8   8  -4 19.4324 30.6093   1
   8   8  -3 34.7498 36.0756   1
   8   9  -5 1981.43 209.817   1
   8   9  -4 314.322 79.8666   1
   8  10  -4 482.434 99.4200   1
  -9   9   3 316.441 120.921   1
  -9   8   4 327.335 113.932   1
  -9   8   3 100.134 71.5685   1
  -9   8   2 224.707 103.456   1
   9  -8  -1 202.997 232.016   1
  -9   8   1 247.093 114.515   1
   9  -8   0 385.190 222.118   1
  -9   8   0 126.785 89.4375   1
  -9   7   4 101.593 65.5256   1
  -9   7   3 45.8127 51.8134   1
  -9   7   2 354.100 118.144   1
  -9   7   1 354.155 123.787   1
   9  -7  -1 450.720 248.673   1
  -9   7   0 135.185 85.0896   1
   9  -7   0 203.018 155.804   1
   9  -7   1 63.3694 115.825   1
  -9   7  -1 109.921 84.5446   1
  -9   7  -2 428.221 154.590   1
   9  -7   2 487.207 205.916   1
  -9   6   5 859.756 153.330   1
  -9   6   4 528.120 120.089   1
  -9   6   3 192.855 79.1522   1
  -9   6   2 813.297 162.219   1
   9  -6  -1 282.320 171.558   1
  -9   6   1 161.662 80.8668   1
   9  -6   0-30.1445 97.6947   1
  -9   6   0 104.782 73.0724   1
  -9   6  -1-8.15122 46.5974   1
   9  -6   1-23.9925 82.9121   1
  -9   6  -2 128.286 91.1145   1
   9  -6   2 247.878 127.833   1
  -9   6  -3 693.124 187.190   1
   9  -6   3 603.917 182.155   1
   9  -6   4 209.453 116.096   1
  -9   6  -4 43.5361 69.7857   1
  -9   5   6 1331.83 180.913   1
  -9   5   5 2940.96 245.692   1
  -9   5   4 354.111 89.1689   1
  -9   5   3 132.702 62.7469   1
  -9   5   2 64.1610 50.4443   1
   9  -5  -2 12.4668 128.629   1
   9  -5  -1 1901.49 349.814   1
  -9   5   1 1572.60 210.074   1
  -9   5   0 248.231 94.3529   1
   9  -5   0 418.939 169.387   1
  -9   5  -1-8.67687 45.4044   1
   9  -5   1 182.746 103.014   1
  -9   5  -2 184.923 93.7114   1
   9  -5   2 55.4712 66.6837   1
   9  -5   3 1914.90 285.753   1
  -9   5  -3 2387.79 309.434   1
   9  -5   4-116.553 92.8799   1
  -9   5  -4 41.7038 63.8929   1
   9  -5   5-36.6325 65.4518   1
  -9   5  -5 61.5226 79.0472   1
   9  -5   6 544.765 165.214   1
  -9   4   7 38.6537 40.8073   1
  -9   4   6 138.031 52.4112   1
  -9   4   5 122.601 48.1002   1
  -9   4   4 85.2216 44.3466   1
  -9   4   3 84.1414 46.4361   1
   9  -4  -2 1878.78 365.587   1
  -9   4   2 1129.16 153.460   1
   9  -4  -1 1374.95 283.235   1
  -9   4   1 1485.04 186.582   1
  -9   4   0 3324.16 303.299   1
   9  -4   0 3618.81 383.716   1
  -9   4  -1-14.5996 41.5323   1
   9  -4   1-64.3873 63.7856   1
   9  -4   2 2659.08 307.154   1
  -9   4  -2 1849.17 240.457   1
   9  -4   3 104.313 77.1707   1
  -9   4  -3 75.1338 64.8512   1
   9  -4   4 84.8608 67.3750   1
  -9   4  -4-43.0347 63.8846   1
   9  -4   5 47.1173 55.5755   1
  -9   4  -5 12.5489 60.6822   1
   9  -4   6 4.44243 40.1698   1
   9  -4   7-9.99086 43.9152   1
  -9   3   7-22.8944 26.0338   1
  -9   3   6 5.06710 18.1571   1
  -9   3   5 140.034 43.1742   1
  -9   3   4 774.356 99.1914   1
  -9   3   3 1355.05 140.160   1
   9  -3  -2 218.958 124.170   1
  -9   3   2 157.552 56.5699   1
  -9   3   1-13.7859 30.9242   1
   9  -3  -1 2.20988 58.4111   1
   9  -3   0 372.049 112.584   1
  -9   3   0 159.726 63.2517   1
  -9   3  -1 184.625 72.3315   1
   9  -3   1 406.610 112.032   1
   9  -3   2 968.568 172.072   1
  -9   3  -2 795.872 154.851   1
   9  -3   3 44.9384 47.1632   1
  -9   3  -3 133.610 78.7177   1
   9  -3   4 281.633 94.1129   1
  -9   3  -4 152.650 93.1419   1
   9  -3   5 1372.58 205.212   1
   9  -3   6 735.057 161.997   1
   9  -3   7 392.908 126.149   1
   9  -3   8 367.965 128.578   1
  -9   2   7 395.361 47.2224   1
  -9   2   6 163.383 34.4665   1
  -9   2   5 2031.72 124.805   1
  -9   2   4 6.99610 18.8926   1
  -9   2   3 624.555 86.4662   1
   9  -2  -2 1923.93 260.120   1
  -9   2   2 1203.29 126.397   1
   9  -2  -1 465.680 119.405   1
  -9   2   1 339.253 76.7218   1
   9  -2   0 73.7755 50.2526   1
  -9   2   0 25.6314 35.7990   1
   9  -2   1 225.272 77.5387   1
  -9   2  -1 267.054 87.2342   1
   9  -2   2 3928.27 286.241   1
   9  -2   3-40.6821 39.6525   1
   9  -2   4 54.3305 47.3045   1
   9  -2   5-3.88049 32.2198   1
   9  -2   6 265.681 93.0028   1
   9  -2   7 220.209 87.9655   1
   9  -2   8 452.324 127.252   1
  -9   1   5 142.928 40.5565   1
   9  -1  -2 90.9583 65.9036   1
   9  -1  -1 1068.09 145.829   1
   9  -1   0 76.3503 46.8477   1
   9  -1   1 2429.45 196.593   1
   9  -1   2 512.475 98.5693   1
   9  -1   3 3819.73 279.143   1
   9  -1   4 472.480 102.388   1
   9  -1   5 551.664 115.834   1
   9  -1   6 631.276 128.591   1
   9  -1   7-12.4553 33.4997   1
   9   0  -2 5.31027 35.7125   1
   9   0  -1 371.183 74.7154   1
   9   0   0 234.727 55.4074   1
   9   0   1 1757.19 157.692   1
   9   0   2 7883.61 342.229   1
   9   0   3 3973.44 257.361   1
   9   0   4 22.7689 30.2578   1
   9   0   5 223.234 71.4211   1
   9   1  -2 22.4209 24.4736   1
   9   1  -1 6469.73 231.187   1
   9   1   0 427.459 67.3551   1
   9   1   1 827.471 97.4469   1
   9   1   2 99.2828 40.1964   1
   9   1   3 2093.20 164.743   1
   9   2  -1 159.022 33.0019   1
   9   2   0 661.484 74.2381   1
   9   2   1-7.70632 14.8421   1
   9   3  -1 34.6385 14.0273   1
   9   5  -4-2.95519 5.79250   1
   9   5  -3 13.8648 12.7109   1
   9   6  -5 48.6861 21.3692   1
   9   6  -4 928.338 88.3211   1
   9   6  -3 264.166 52.1605   1
   9   7  -4 1088.66 118.561   1
   9   7  -3 56.1808 34.5237   1
   9   8  -3 190.969 57.8531   1
 -10   8   4 52.0259 57.8662   1
 -10   8   3 17.9163 50.3000   1
 -10   8   2 95.8959 78.6052   1
  10  -8  -1 267.768 264.311   1
 -10   8   1 145.597 92.2015   1
 -10   7   5-51.8942 51.9228   1
 -10   7   4 19.6802 43.3220   1
 -10   7   3-19.0984 46.3953   1
 -10   7   2 321.428 114.316   1
  10  -7  -1 450.853 263.850   1
 -10   7   1 554.269 151.674   1
 -10   7   0 373.028 134.197   1
  10  -7   0 610.645 244.679   1
 -10   7  -1-35.4310 64.9781   1
  10  -7   1 153.221 150.730   1
 -10   6   6 14.9887 34.5935   1
 -10   6   5 36.3960 41.3806   1
 -10   6   4 549.638 122.829   1
 -10   6   3 238.125 88.8771   1
 -10   6   2-57.7192 53.7102   1
  10  -6  -1 14.0275 107.682   1
 -10   6   1-11.2982 42.7405   1
 -10   6   0 34.0602 54.8099   1
  10  -6   0 264.375 166.954   1
 -10   6  -1 155.412 94.4664   1
  10  -6   1-0.69471 79.3073   1
 -10   6  -2 605.123 169.673   1
  10  -6   2 933.966 237.191   1
  10  -6   3 356.455 151.360   1
 -10   6  -3 225.862 114.341   1
 -10   5   6 108.507 49.1907   1
 -10   5   5 45.1641 38.4485   1
 -10   5   4-22.1998 34.9857   1
 -10   5   3 49.6308 43.2009   1
 -10   5   2 23.9587 39.2131   1
  10  -5  -2 55.3945 152.905   1
 -10   5   1 34.4681 45.8765   1
  10  -5  -1 183.584 136.694   1
 -10   5   0 88.4542 66.2716   1
  10  -5   0 210.658 135.939   1
 -10   5  -1 589.545 146.551   1
  10  -5   1 846.287 209.379   1
  10  -5   2 52.3457 69.8277   1
 -10   5  -2 69.4601 65.3498   1
  10  -5   3 742.092 183.862   1
 -10   5  -3 659.087 170.375   1
 -10   5  -4 380.102 146.646   1
  10  -5   4 651.083 186.542   1
  10  -5   5 841.780 215.600   1
 -10   4   6 3600.86 213.002   1
 -10   4   5 47.0419 33.4122   1
 -10   4   4-47.1991 34.5221   1
 -10   4   3 248.097 70.6534   1
 -10   4   2 55.1925 43.7183   1
  10  -4  -2 52.9544 123.072   1
 -10   4   1 48.2277 45.4471   1
  10  -4  -1 93.8457 105.371   1
 -10   4   0 1156.79 172.584   1
  10  -4   0 1505.29 268.816   1
 -10   4  -1 2762.98 278.412   1
  10  -4   1 2825.44 330.248   1
  10  -4   2 923.876 184.289   1
 -10   4  -2 609.197 146.277   1
  10  -4   3 56.8130 67.5630   1
 -10   4  -3 161.125 91.3839   1
  10  -4   4 214.720 100.034   1
 -10   4  -4 160.629 101.352   1
  10  -4   5 443.006 132.981   1
  10  -4   6 278.096 108.804   1
 -10   3   5 589.999 79.7917   1
 -10   3   4 249.300 58.7739   1
 -10   3   3 7.51064 24.7705   1
  10  -3  -2-116.361 111.933   1
 -10   3   2 7.83225 26.1842   1
 -10   3   1-17.0128 31.2687   1
  10  -3  -1 51.0962 80.4435   1
  10  -3   0 43.8252 58.1279   1
 -10   3   0-106.541 56.5009   1
  10  -3   1 202.012 84.7765   1
 -10   3  -1 185.563 78.3296   1
  10  -3   2 762.495 164.365   1
 -10   3  -2 667.409 151.662   1
  10  -3   3 1467.30 209.526   1
  10  -3   4-32.5545 43.8328   1
  10  -3   5-33.4025 45.0649   1
  10  -3   6-56.8604 53.8532   1
  10  -3   7 263.144 103.102   1
 -10   2   5-52.6868 25.8590   1
 -10   2   4 82.9033 34.9178   1
 -10   2   3 207.656 57.5239   1
  10  -2  -2 1221.10 217.852   1
 -10   2   2 791.706 117.500   1
  10  -2  -1 99.9748 75.6685   1
 -10   2   1-44.4357 43.3074   1
  10  -2   0-1.15610 34.2580   1
  10  -2   1 496.514 121.100   1
  10  -2   2 818.549 138.215   1
  10  -2   3 1291.93 172.793   1
  10  -2   4 399.004 102.131   1
  10  -2   5-0.39114 30.0261   1
  10  -2   6-39.6436 45.9639   1
  10  -2   7 308.256 101.602   1
  10  -2   8 218.062 89.5876   1
  10  -1  -2 33.0967 55.9820   1
  10  -1  -1 1332.08 174.946   1
  10  -1   0 119.828 59.6267   1
  10  -1   1 175.622 60.6464   1
  10  -1   2 165.007 59.2565   1
  10  -1   3 171.577 63.8327   1
  10  -1   4 208.302 71.6317   1
  10  -1   5 540.673 112.065   1
  10  -1   6 737.768 135.680   1
  10  -1   7 16.3068 33.9379   1
  10   0  -2 333.438 86.2164   1
  10   0  -1 130.846 51.4087   1
  10   0   0 77.7694 38.9895   1
  10   0   1 275.551 64.8446   1
  10   0   2 20.9503 28.2298   1
  10   0   3 1206.32 142.233   1
  10   0   4 52.1401 37.1814   1
  10   0   5 187.768 63.9717   1
  10   1  -2 52.9349 33.6319   1
  10   1  -1 4489.45 230.120   1
  10   1   0 146.959 42.5570   1
  10   1   1 1417.11 129.389   1
  10   1   2 464.410 79.1015   1
  10   1   3-30.5406 28.0638   1
  10   2  -1 4.44914 13.1574   1
  10   2   0 499.730 66.2535   1
  10   2   1 58.0634 28.4085   1
  10   2   2 483.737 68.7638   1
  10   3  -1 530.740 53.5497   1
  10   3   0 2501.22 121.167   1
  10   6  -3 2090.10 116.285   1
 -11   8   4 468.103 139.922   1
 -11   8   3 141.093 85.8862   1
 -11   8   2 798.252 186.530   1
 -11   7   4 108.722 69.0468   1
 -11   7   3-134.949 75.4376   1
 -11   7   2 25.5277 50.1688   1
 -11   7   1 223.778 102.910   1
  11  -7  -1 463.534 285.146   1
  11  -7   0-179.353 161.954   1
 -11   7   0 43.9170 65.1526   1
 -11   6   4 9.45718 34.7461   1
 -11   6   3 30.4383 43.9928   1
 -11   6   2 416.489 115.788   1
 -11   6   1-30.0773 50.7794   1
  11  -6  -1 244.383 192.363   1
 -11   6   0 61.8188 66.2388   1
  11  -6   0 1927.94 398.028   1
 -11   6  -1 177.673 94.8653   1
  11  -6   1 404.787 191.972   1
  11  -6   2 94.0045 102.109   1
 -11   6  -2 217.943 107.151   1
 -11   5   4 246.882 72.0077   1
 -11   5   3 324.524 87.4109   1
 -11   5   2 174.022 72.8799   1
 -11   5   1 103.511 62.9497   1
  11  -5  -1 439.494 195.608   1
  11  -5   0 469.028 199.367   1
 -11   5   0 480.024 123.704   1
  11  -5   1-71.9437 90.4779   1
 -11   5  -1 29.6499 48.9614   1
  11  -5   2 145.697 99.5068   1
 -11   5  -2 132.873 82.5076   1
  11  -5   3 333.935 130.755   1
 -11   5  -3 255.013 118.119   1
  11  -5   4 432.308 149.641   1
 -11   4   3 22.1242 32.1904   1
 -11   4   2 189.545 65.7800   1
  11  -4  -2 478.989 228.125   1
  11  -4  -1 472.410 184.745   1
 -11   4   1 267.268 80.8769   1
 -11   4   0 858.816 149.003   1
  11  -4   0 1337.27 275.605   1
  11  -4   1-63.4286 71.5574   1
 -11   4  -1-151.671 77.0838   1
  11  -4   2 22.5032 52.1661   1
 -11   4  -2 63.3656 63.6422   1
 -11   4  -3 142.133 93.1694   1
  11  -4   3 38.0829 59.9138   1
  11  -4   4 102.612 79.7018   1
  11  -4   5 141.664 84.0782   1
 -11   3   3 2240.55 179.835   1
 -11   3   2 674.992 111.586   1
  11  -3  -2 879.990 241.401   1
 -11   3   1 922.233 142.469   1
  11  -3  -1 1562.53 293.060   1
  11  -3   0-19.5408 56.0064   1
 -11   3   0-10.6829 37.9967   1
  11  -3   1-0.04498 39.6263   1
 -11   3  -1 60.7577 58.8358   1
  11  -3   2 192.783 90.5440   1
  11  -3   3-28.1920 47.8619   1
  11  -3   4-39.9498 47.6602   1
  11  -3   5 80.3900 58.0801   1
  11  -3   6 38.2757 47.1601   1
  11  -2  -2 542.653 164.011   1
  11  -2  -1 12.6796 63.1054   1
  11  -2   0 208.783 86.4542   1
  11  -2   1 152.501 74.3229   1
  11  -2   2 53.7281 48.9191   1
  11  -2   3-75.8481 50.4164   1
  11  -2   4 855.259 145.254   1
  11  -2   5 306.605 92.6695   1
  11  -2   6 130.843 67.3887   1
  11  -2   7-93.2212 61.7438   1
  11  -1  -2 344191. 3062.78   1
  11  -1  -1-72.7180 60.7316   1
  11  -1   0 12.4260 35.6312   1
  11  -1   1 3357.09 266.087   1
  11  -1   2-32.1065 34.6066   1
  11  -1   3 51.8160 39.7636   1
  11  -1   4 66.4297 45.4265   1
  11  -1   5 463.397 105.392   1
  11  -1   6 0.86500 25.3548   1
  11  -1   7 108.597 57.5766   1
  11   0  -2 2315.30 207.032   1
  11   0  -1 9.97973 35.2215   1
  11   0   0 2658.55 219.707   1
  11   0   1 20.4655 27.7654   1
  11   0   2-20.3419 28.5594   1
  11   0   3 45.9927 35.4794   1
  11   0   4 123.167 51.4531   1
  11   0   5 315.043 79.6332   1
  11   1  -2 919.201 100.664   1
  11   1  -1 50.4074 33.7146   1
  11   1   0 0.86922 19.4008   1
  11   1   1 1717.56 149.520   1
  11   1   2-10.9922 21.6019   1
  11   1   3 353.945 72.6355   1
  11   1   4 40.0398 30.8434   1
  11   2  -1 56.4012 27.0282   1
  11   2   0 1388.30 116.059   1
  11   2   1 106.647 36.4786   1
  11   2   2 433.686 71.1737   1
  11   3  -1 12.5085 13.6745   1
  11   3   0 372.460 53.7454   1
  11   4  -1 146.652 27.8843   1
 -12   7   1 140.632 86.9046   1
  12  -7  -1 241.202 249.582   1
 -12   6   1 467.125 125.386   1
  12  -6  -1 988.601 350.858   1
  12  -6   0-92.6862 128.953   1
 -12   6   0 43.8008 54.3570   1
  12  -6   1-166.478 148.438   1
 -12   6  -1 225.555 101.004   1
  12  -5  -1-214.161 165.175   1
 -12   5   1 16.2258 36.5234   1
  12  -5   0 30.2476 102.273   1
 -12   5   0 81.7440 58.8960   1
  12  -5   1 124.633 117.074   1
 -12   5  -1-37.7464 53.9170   1
  12  -5   2 516.381 171.509   1
 -12   5  -2 245.072 109.227   1
  12  -5   3 646.512 182.226   1
  12  -4  -1-103.801 113.944   1
 -12   4   1 32.8053 41.0588   1
 -12   4   0 78.1858 57.8328   1
  12  -4   0-218.180 136.138   1
  12  -4   1 49.5263 72.9029   1
 -12   4  -1-95.7147 69.5926   1
  12  -4   2 277.499 114.796   1
  12  -4   3 188.563 95.1619   1
  12  -4   4 200.191 105.356   1
  12  -3  -2 480.558 198.657   1
  12  -3  -1 270.150 139.310   1
  12  -3   0 1067.63 227.178   1
  12  -3   1 193.872 94.4427   1
  12  -3   2 266.166 100.736   1
  12  -3   3 382.096 125.780   1
  12  -3   4 724.410 157.033   1
  12  -3   5 572.740 135.617   1
  12  -2  -2 197.639 119.445   1
  12  -2  -1 155.835 106.583   1
  12  -2   0-69.3851 65.3945   1
  12  -2   1 115.218 66.8266   1
  12  -2   2 153.102 78.0133   1
  12  -2   3 132.723 65.0018   1
  12  -2   4 183.514 71.8428   1
  12  -2   5-47.7917 44.0355   1
  12  -2   6-28.5332 38.9319   1
  12  -1  -2-36.6562 64.4916   1
  12  -1  -1 413.034 127.802   1
  12  -1   0 99.2300 60.2841   1
  12  -1   1-104.110 63.2939   1
  12  -1   2 77.3179 47.8827   1
  12  -1   3-25.3546 33.2363   1
  12  -1   4 176.064 64.6724   1
  12  -1   5 94.3181 52.0198   1
  12  -1   6 91.2578 52.6863   1
  12   0  -1 1347.51 172.484   1
  12   0   0 31.0442 40.0699   1
  12   0   1 164.088 58.0758   1
  12   0   2-21.2354 28.7336   1
  12   0   3 184.483 61.0136   1
  12   0   4 852.197 126.043   1
  12   0   5 321.457 78.9029   1
  12   1  -1 113.206 48.7923   1
  12   1   0 65.4880 39.2539   1
  12   1   1 41.1990 30.4180   1
  12   1   2 606.479 96.0689   1
  12   1   3-45.7275 31.3894   1
  12   1   4 14.3899 23.6154   1
  12   2  -1 120.012 39.2757   1
  12   2   0 243.133 52.1973   1
  12   2   1 114.048 39.9945   1
  12   2   2-28.5444 24.6051   1
  12   3   0 195.594 42.6833   1
  12   3   1 188.488 43.4190   1
  12   4   0 275.599 45.0640   1
  13  -6  -1 1739.48 483.023   1
  13  -6   0 410.378 210.895   1
  13  -5  -1 569.170 253.602   1
  13  -5   0 282.916 170.770   1
  13  -5   1-82.8032 111.849   1
 -13   5  -2 418.535 141.848   1
  13  -5   2 559.633 188.621   1
  13  -4   0 762.534 240.348   1
  13  -4   1 91.3394 95.7170   1
  13  -4   2 49.2672 69.9202   1
  13  -4   3 88.9640 74.4288   1
  13  -3   0 187.500 121.164   1
  13  -3   1 35.3928 63.2114   1
  13  -3   2-13.2858 47.0344   1
  13  -3   3 90.7926 71.2546   1
  13  -3   4 565.983 148.553   1
  13  -2   0 42.3752 66.7546   1
  13  -2   1 51.1173 56.5417   1
  13  -2   2 14.2142 44.2632   1
  13  -2   3 308.401 101.395   1
  13  -2   4 119.058 62.2181   1
  13  -2   5 48.8676 43.8402   1
  13  -1   0 310.231 101.099   1
  13  -1   1 124.406 65.6687   1
  13  -1   2-8.96126 35.4427   1
  13  -1   3 211.160 71.8591   1
  13  -1   4 0.76893 25.4458   1
  13  -1   5 156.217 62.2546   1
  13  -1   6 349.170 92.0657   1
  13   0   1 85.6241 53.2663   1
  13   0   2 451.327 92.1147   1
  13   0   3 246.436 68.4457   1
  13   0   4 513.839 99.7557   1
  13   0   5-13.9864 27.8768   1
  13   1   1 100.328 44.4687   1
  13   1   2 36.2919 30.6161   1
  13   1   3-5.60911 22.8424   1
  13   1   4 53.9597 34.2820   1
  13   2   2 360.844 69.4153   1
  14  -3   3-13.9153 46.0304   1
  14  -2   3 68.3536 62.6893   1
  14  -2   4 81.5067 58.9207   1
  14  -2   5 657.961 132.442   1
  14  -1   3 211.307 77.4444   1
  14  -1   4-25.5077 34.6633   1
  14  -1   5 149.821 60.8896   1
  14   0   4 29.6654 31.8443   1
  14   0   5 36.7012 34.1857   1
  14   1   4 331.325 76.2734   1
   0   0   0    0.00    0.00   0
TITL Coes_C1_P2_s0 in P-1
REM P-1 (#2 in standard setting)
CELL 0.28965   6.517466   6.875424   8.494309  69.6119  83.2886  81.9903
ZERR   16.00   0.000805   0.001151   0.001483   0.0157   0.0124   0.0122
LATT  1
SFAC O Si
UNIT 32.00 16.00
TREF
HKLF 4
END
;
_shelx_hkl_checksum   33020

# start Validation Reply Form
_vrf_ATOM007_Coesite-IV_49.31GPa
;
PROBLEM: _atom_site_aniso_label is missing
RESPONSE: Due to incompleteness of the dataset thermal parameters were refined
 in isotropic approximation.

;
_vrf_PLAT029_Coesite-IV_49.31GPa
;
PROBLEM: _diffrn_measured_fraction_theta_full value Low .      0.366 Why?  
RESPONSE: The dataset was incomplete since the data were collected in
 a diamond anvil cell metallic body of which shadows
 more than 60% of the reflections.

;
_vrf_PLAT911_Coesite-IV_49.31GPa
;
PROBLEM: Missing FCF Refl Between Thmin & STh/L=    0.600        795 Report
RESPONSE: Certain part of the reflections is missing due to geometry 
of the experiment. The metallic body of the diamond anvil cell 
absorbs more than 60% of the reflections.

;
# end Validation Reply Form
